# Supplementary material for: Profile and triage validity of trauma patients triaged green: a prospective cohort study from a secondary care hospital in India
Source: PubMed Central journal article supplement (PMC10173999; doi:10.1136/bmjopen-2022-065036), 2023-05-08
Supplement: bmjopen-2022-065036.draft_revisions.pdf [file bmjopen-2022-065036.draft_revisions.pdf]

# BMJ Open

BMJ Open is committed to open peer review. As part of this commitment we make the peer review history of every article we publish publicly available.

When an article is published we post the peer reviewers' comments and the authors' responses online. We also post the versions of the paper that were used during peer review. These are the versions that the peer review comments apply to.

The versions of the paper that follow are the versions that were submitted during the peer review process. They are not the versions of record or the final published versions. They should not be cited or distributed as the published version of this manuscript.

BMJ Open is an open access journal and the full, final, typeset and author-corrected version of record of the manuscript is available on our site with no access controls, subscription charges or pay-per-view fees (<http://bmjopen.bmj.com>).

If you have any questions on BMJ Open's open peer review process please email [info.bmjopen@bmj.com](mailto:info.bmjopen@bmj.com)

# BMJ Open

## Profile and Triage Appropriateness of Trauma Patients Triage Green: A Prospective Cohort Study from a Secondary Care Hospital in India

|                               |                                                                                                                                                                                                                                                                                                                                                                                                                                                                                                                                                                                                                                                                                                                                                                                                                                                                                                                                                                                                                                                                                                                                                                                                                                                                                                                                                                                                                                                                                                                                                                                       |
|-------------------------------|---------------------------------------------------------------------------------------------------------------------------------------------------------------------------------------------------------------------------------------------------------------------------------------------------------------------------------------------------------------------------------------------------------------------------------------------------------------------------------------------------------------------------------------------------------------------------------------------------------------------------------------------------------------------------------------------------------------------------------------------------------------------------------------------------------------------------------------------------------------------------------------------------------------------------------------------------------------------------------------------------------------------------------------------------------------------------------------------------------------------------------------------------------------------------------------------------------------------------------------------------------------------------------------------------------------------------------------------------------------------------------------------------------------------------------------------------------------------------------------------------------------------------------------------------------------------------------------|
| Journal:                      | <i>BMJ Open</i>                                                                                                                                                                                                                                                                                                                                                                                                                                                                                                                                                                                                                                                                                                                                                                                                                                                                                                                                                                                                                                                                                                                                                                                                                                                                                                                                                                                                                                                                                                                                                                       |
| Manuscript ID                 | bmjopen-2022-065036                                                                                                                                                                                                                                                                                                                                                                                                                                                                                                                                                                                                                                                                                                                                                                                                                                                                                                                                                                                                                                                                                                                                                                                                                                                                                                                                                                                                                                                                                                                                                                   |
| Article Type:                 | Original research                                                                                                                                                                                                                                                                                                                                                                                                                                                                                                                                                                                                                                                                                                                                                                                                                                                                                                                                                                                                                                                                                                                                                                                                                                                                                                                                                                                                                                                                                                                                                                     |
| Date Submitted by the Author: | 06-Jun-2022                                                                                                                                                                                                                                                                                                                                                                                                                                                                                                                                                                                                                                                                                                                                                                                                                                                                                                                                                                                                                                                                                                                                                                                                                                                                                                                                                                                                                                                                                                                                                                           |
| Complete List of Authors:     | <p>Anthony, Aroke; Doctors For You<br/> Dutta, Rohini; - World Health Organization Collaborating Center for Research in Surgical Care Delivery in Low-and-Middle Income Countries; - Christian Medical College and Hospital, Sarang, Bhakti; World Health Organization Collaborating Centre on Research in Surgical Care Delivery in Low-Middle-Income Countries; Terna Medical College &amp; Hospital, Department of Surgery<br/> David, Siddarth; Karolinska Institutet, Department of Global Public Health<br/> O'Reilly, Gerard; Monash University, Emergency medicine<br/> Raykar, Nakul; Harvard Medical School, Department of Global Health and Social Medicine; Brigham and Women's Hospital, Emergency Surgery<br/> Khajanchi, Monty; Seth Gowardhandas Sunderdas Medical College and King Edward Memorial Hospital, Department of Surgery<br/> Attergrim, Jonatan; Karolinska Institutet<br/> Soni, Kapil; All India Institute of Medical Sciences, Critical Care<br/> Sharma, Naveen; All India Institute of Medical Sciences, Surgery<br/> Mohan, Monali; WHO Collaboration Centre for Research in Surgical Care Delivery in LMICs, Mumbai, India,<br/> Gadgil, Anita; World Health Organization Collaborating Center for Research in Surgical Care Delivery in Low-and-Middle Income Countries<br/> Roy, Nobhojit; World Health Organization Collaborating Center for Research in Surgical Care Delivery in Low-and-Middle Income Countries<br/> Gerdin Wärnberg, Martin ; Karolinska Institutet, Department of Global Public Health; Karolinska University Hospital</p> |
| Keywords:                     | TRAUMA MANAGEMENT, ACCIDENT & EMERGENCY MEDICINE, Trauma management < ORTHOPAEDIC & TRAUMA SURGERY                                                                                                                                                                                                                                                                                                                                                                                                                                                                                                                                                                                                                                                                                                                                                                                                                                                                                                                                                                                                                                                                                                                                                                                                                                                                                                                                                                                                                                                                                    |
|                               |                                                                                                                                                                                                                                                                                                                                                                                                                                                                                                                                                                                                                                                                                                                                                                                                                                                                                                                                                                                                                                                                                                                                                                                                                                                                                                                                                                                                                                                                                                                                                                                       |

SCHOLARONE™  
Manuscripts

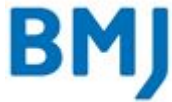

I, the Submitting Author has the right to grant and does grant on behalf of all authors of the Work (as defined in the below author licence), an exclusive licence and/or a non-exclusive licence for contributions from authors who are: i) UK Crown employees; ii) where BMJ has agreed a CC-BY licence shall apply, and/or iii) in accordance with the terms applicable for US Federal Government officers or employees acting as part of their official duties; on a worldwide, perpetual, irrevocable, royalty-free basis to BMJ Publishing Group Ltd ("BMJ") its licensees and where the relevant Journal is co-owned by BMJ to the co-owners of the Journal, to publish the Work in this journal and any other BMJ products and to exploit all rights, as set out in our [licence](#).

The Submitting Author accepts and understands that any supply made under these terms is made by BMJ to the Submitting Author unless you are acting as an employee on behalf of your employer or a postgraduate student of an affiliated institution which is paying any applicable article publishing charge ("APC") for Open Access articles. Where the Submitting Author wishes to make the Work available on an Open Access basis (and intends to pay the relevant APC), the terms of reuse of such Open Access shall be governed by a Creative Commons licence – details of these licences and which [Creative Commons](#) licence will apply to this Work are set out in our licence referred to above.

Other than as permitted in any relevant BMJ Author's Self Archiving Policies, I confirm this Work has not been accepted for publication elsewhere, is not being considered for publication elsewhere and does not duplicate material already published. I confirm all authors consent to publication of this Work and authorise the granting of this licence.

## Profile and Triage Appropriateness of Trauma Patients Triage Green: A Prospective Cohort Study from a Secondary Care Hospital in India

Aroke Anna Anthony,<sup>1,2</sup> Rohini Dutta,<sup>2,3</sup> Bhakti Sarang,<sup>2,4</sup> Siddarth David,<sup>5</sup> Gerard O'Reilly,<sup>6,7,8</sup> Nakul Raykar,<sup>9,10,11</sup> Monty Khajanchi,<sup>2,12</sup> Jonatan Attergrim,<sup>13</sup> Kapil Dev Soni,<sup>14</sup> Naveen Sharma,<sup>15</sup> Monali Mohan,<sup>2</sup> Anita Gadgil,<sup>2</sup> Nobhojit Roy,<sup>2,5,7</sup> Martin Gerdin Wörnberg<sup>5,13</sup>

<sup>1</sup> Doctors For You, Mumbai, India

<sup>2</sup> Trauma Research Group, World Health Organization Collaborating Centre on Research in Surgical Care Delivery in Low-Middle-Income Countries, Mumbai, India

<sup>3</sup> MBBS, Christian Medical College and Hospital, Ludhiana, India

<sup>4</sup> Department of Surgery, Terna Medical College & Hospital, New Mumbai, India

<sup>5</sup> Department of Global Public Health, Karolinska Institutet, Stockholm, Sweden

<sup>6</sup> Epidemiology & Biostatistics, National Trauma Research Institute, The Alfred, Melbourne, Australia

<sup>7</sup> School of Public Health & Preventive Medicine, Monash University, Melbourne, Australia

<sup>8</sup> Global programs, Emergency & Trauma Centre, The Alfred, Melbourne, Australia

<sup>9</sup> Program in Global Surgery and Social Change, Harvard Medical School, Boston, USA

<sup>10</sup> Trauma, Emergency Surgery & Surgical Critical Care, Brigham and Women's Hospital, Boston, MA, USA

<sup>11</sup> Center for Surgery and Public Health, Brigham and Women's Hospital, Boston, MA, USA

<sup>12</sup> Department of Surgery, Seth.G.S. Medical College & K.E.M. Hospital, Parel, Mumbai, India

<sup>13</sup> Function Perioperative Medicine and Intensive Care, Karolinska University Hospital, Stockholm, Sweden

<sup>14</sup> Critical & Intensive Care, JPN Apex Trauma Centre, AIIMS, New Delhi, India

<sup>15</sup> Department of Surgery, All India Institute of Medical Sciences, Jodhpur, India

**Corresponding Author:** Martin Gerdin Wörnberg

Department of Global Public Health, Karolinska Institutet, Stockholm, Sweden; Function Perioperative Medicine and Intensive Care, Karolinska University Hospital, Stockholm, Sweden.

Address: Department of Global Public Health

Karolinska Institutet

171 77 Stockholm

Email: martin.gerdin@ki.se

Phone Number: +46 708539598

1  
2  
3  
4  
5 **Short title:** Profile and Triage Appropriateness of Trauma Patients Triage Green in a Secondary  
6 Care Hospital in India  
7

8  
9 **Word Count (Abstract):** 239 words  
10

11  
12 **Word Count (Manuscript):** 4472 words  
13  
14  
15  
16  
17  
18  
19  
20  
21  
22  
23  
24  
25  
26  
27  
28  
29  
30  
31  
32  
33  
34  
35  
36  
37  
38  
39  
40  
41  
42  
43  
44  
45  
46  
47  
48  
49  
50  
51  
52  
53  
54  
55  
56  
57  
58  
59  
60

For peer review only

## ABSTRACT

**Objective:** To evaluate the profile of non-urgent patients triaged 'green', as part of a triage-trial in the Emergency Department (ED) of a secondary-care hospital in India. The secondary aim was to validate our findings with the Cape Triage Score (CTS).

**Design:** Prospective cohort study

**Setting:** A secondary care-hospital in Mumbai, India.

**Participants:** Patients aged 18 years and above with a history of trauma defined as having any of the external causes of morbidity and mortality listed in block V01-Y36, chapter XX of the International Classification of Disease version 10 (ICD-10) codebook, triaged green between July 2016 to November 2019.

**Outcome:** Primary outcome measures were mortality within 24-hours, 30-days, and 6-months.

**Results:** We included 4135 trauma patients triaged green. The mean age of patients was 32.8 ( $\pm 13.1$ ) years, and 77% were males. The median (IQR) length of stay of admitted patients was 3 (13) days. Half the patients had a mild Injury Severity Score (3-8), with the majority of injuries being blunt (98%). Of the patients triaged green by clinicians, three-quarters (74%) were undertriaged on cross validating with CTS. On telephonic follow-up two patients were reported dead whereas one died while admitted in-hospital.

**Conclusion:** Our study highlights the need for implementation and evaluation of trauma triage training for the in-hospital first responders (clinicians, nurses and other paramedical staff) in the EDs.

**Ethical clearance:** Ethics committee approval for TTRIS was obtained from the ethics and scientific committee of KBBH (KBBH, HO/4982/KBB,12/08/2016).

**Strengths and limitations of this study:**

- It is the first study from a secondary care hospital in India that provides the profile and outcomes of patients triaged green.
- The study provides robust data from one of the largest studies done in a secondary care hospital in a LMIC setting.
- The study provides data from a single secondary care hospital in Mumbai. Therefore, the results cannot be generalised to other Indian hospitals due to hospital bias.
- Data of only the first 10 consecutive patients were collected each shift during the study period.
- Data on morbidity and from autopsy reports were unavailable to determine the morbidity outcomes and exact cause of death.

## INTRODUCTION

Globally, each year, 4.5 million people die from trauma, with India contributing to 20% of this burden.(1) Trauma represents the second most common cause of death after age five in India.(2) Furthermore, India also has the highest rank in the number of deaths attributable to road traffic-related deaths in the world.(3) Approximately 50% of trauma deaths occur in the hospitals, highlighting the need for strengthening in-hospital care.(4) Trauma care is highly time-sensitive, and the early identification of injuries is important for survival.(5) Establishment of hospital triage systems can ensure that critically ill patients are identified and receive care promptly.(6) For this purpose, several triage scores are used across different countries and hospital settings.(7,8)

In India, the high population density, poorly developed prehospital care and a lack of appropriate referral systems leads to overcrowding in the emergency departments (EDs).(9–12) Most EDs lack triage protocols and the level of emergency patient care is decided by clinicians who are not trained specifically in trauma care.(13,14) Trauma management trainings are also not incorporated as a separate subject in the medical training of clinicians. Inappropriate triage is known to have contributed to a surge in non-urgent patients, exacerbating the problem of overcrowding in the ED.(14–17) This may be due to prioritising the evaluation of patients with low urgency, which results in the diversion of workforce and resources from serious patients requiring immediate care. Nonetheless, not evaluating these patients could result in missed injuries and poor outcomes.

In our study, clinicians at a triage-naive ED were introduced to a triage-trial, as part of a multicentre triage project which compared prediction models for triage in adult trauma patients presenting to various emergency departments across India.(15) The patients were designated one of the four trauma triage categories by clinicians, based on their understanding of trauma triage; into red, orange, yellow, green, with red and green denoting the most and least urgent patient status



1  
2  
3 respectively. We aimed to evaluate the profile of the non-urgent patients who were triaged green  
4  
5 by clinicians and the validity of this category in comparison to the Cape Triage Score (CTS). CTS  
6  
7 is a mixed score based on physiological parameters and the pathology of the patient and has been  
8  
9 effectively used at various settings in South Africa and Low- and Middle-Income Countries  
10  
11 (LMIC) since 2006.(18) It is a comprehensive triage score with a low undertriage rate capable of  
12  
13 predicting patient disposition.(19)  
14  
15

## 16 17 18 19 **METHODOLOGY**

### 20 21 *Study Design*

22  
23 This single-centre prospective cohort study is part of the Trauma Triage Study in India (TTRIS)  
24  
25 which compares prediction models for triage in adult trauma patients presenting to various  
26  
27 emergency departments across India. Data was collected in the study site from July 2016 to  
28  
29 November 2019.  
30  
31

### 32 33 *Study Setting*

34  
35 The study site was the ED of Khurshedji Behramji Bhabha Hospital (KBBH), a 436 bedded  
36  
37 regional secondary healthcare centre located in Mumbai, India, catering to approximately 350  
38  
39 patients each day in the ED. It is a secondary-care public hospital with free or nominal fees,  
40  
41 providing access to low socio-economic groups and receives patients from across the city. At  
42  
43 KBBH, trauma care is imparted as a subspeciality along with medical, surgical, and obstetric care.  
44  
45 The hospital has an intensive care facility but there is no neurosurgery department, so patients in  
46  
47 need of neurosurgical management are referred to tertiary care centres. Plain radiography and  
48  
49 ultrasonography are available round the clock; however computerized tomography (CT) is only  
50  
51 available in-house from 7am to 6pm. The patients arriving at the ED are first seen by a casualty  
52  
53  
54  
55  
56  
57  
58  
59  
60

1  
2  
3 medical officer (CMO) largely on a first-come, first-served basis without a formalised system of  
4 triaging patients at the ED.  
5  
6

### 7 *Clinician Triage*

8  
9  
10 As part of data collection of TTRIS, the triage-naive clinicians were informed about the trauma  
11 triage categories, without provision to any formal tool or training about the same. The clinicians  
12 involved have a minimum of 2 years clinical experience, however, they are neither trained in  
13 trauma care as a speciality nor are they necessarily trained in trauma management courses like  
14 ATLS. Medical training of the clinicians include aspects such as triage systems in theory  
15 however not put in practise due to lack of formal triage protocols. After their initial on-arrival  
16 assessment of each patient, the research officers asked the clinicians to categorise the patient as  
17 per their understanding of how urgently the patient requires treatment into the aforementioned  
18 colour-coded triage groups; red, orange, yellow, green, with red and green denoting the most and  
19 least urgent patient status respectively,(15) henceforth referred to as the triage levels. The  
20 clinicians were allowed to use all available information that was extracted by them during initial  
21 routine assessment (such as wound assessment) along with patient vitals that were collected by  
22 the research officer for determining the urgency of treatment required and thereby the triage  
23 level. The triage levels were not used to determine treatment decisions in the ED as there was no  
24 formalised tool or protocol in place for assigning the triage and coupling it with patient  
25 management. The clinicians were individually informed about the aim and methodology used for  
26 the TTRIS study at the start of their respective posting at the ED, however, the clinicians were  
27 neither involved in the conception nor were they part of the research team analysing the results.  
28  
29  
30  
31  
32  
33  
34  
35  
36  
37  
38  
39  
40  
41  
42  
43  
44  
45  
46  
47  
48  
49  
50

### 51 *Participants*

1  
2  
3 *Inclusion Criteria:* We included all the patients aged 18 years and above presenting to the KBBH  
4 ED with a history of trauma and triaged green by clinical triage on initial evaluation irrespective  
5 of their injury severity. A history of trauma was defined here as having any of the external causes  
6 of morbidity and mortality listed in block V01-Y36, chapter XX of the International  
7 Classification of Disease version 10 (ICD-10) online codebook, with some exclusions (see online  
8 supplementary material).(20) Only patients with above mentioned causes of trauma as their  
9 primary complaint were included. For example, patients with a history of fall due to dizziness  
10 were not included in the study.  
11  
12  
13  
14  
15  
16  
17  
18  
19  
20

21 *Exclusion Criteria:* Patients with one or more vital parameters missing among the variables used  
22 for analysis or who did not consent to follow-up were excluded from the analysis.  
23  
24  
25

### 26 ***Source and methods of selection of participants and follow-up***

27  
28 The research officer at KBBH observed morning, evening and night shifts (6-hour observational  
29 shifts). These shifts were not aligned with the working hours of the clinical staff to reduce bias and  
30 accounting for shift fatigue of the clinicians. Data were collected from the first 10 consecutive  
31 patients only, irrespective of their triage, during each shift. Due to the large patient load and time  
32 and budgetary constraints of the project, data collection of only the first 10 patients was considered  
33 feasible for follow-up.  
34  
35  
36  
37  
38  
39  
40  
41

42 The research officer performed follow-up at 24-hours, 30-days and 6-months after arrival at the  
43 ED. The time frame of the study was chosen to ensure that all included patients had completed 6  
44 months of follow-up to minimise the loss to follow-up. The follow-up was completed in-person or  
45 by telephone, depending on whether the patient was still hospitalised or if the patient had been  
46 discharged. The phone numbers of one or more contact persons, mostly relatives, were collected  
47 on enrolment and those people were contacted if the participant did not reply to the follow-up  
48  
49  
50  
51  
52  
53  
54  
55  
56  
57  
58  
59  
60

1  
2  
3 telephone calls. The outcome was recorded as missing if neither the patient nor the relative were  
4  
5 available for follow-up at the specified time-points.  
6  
7

### 8 *Variables*

9

10 The outcome measures were mortality within 24-hours, 30-days and 6-months.

11  
12 Additionally, for each participant, age, sex, transfer status, time of injury, mechanism of injury,  
13  
14 injury-related details, number of serious injuries, and the assigned informal triage category were  
15  
16 collected. Physiological measures including systolic blood pressure (SBP), respiratory rate (RR),  
17  
18 heart rate (HR), peripheral capillary oxygen saturation (SpO<sub>2</sub>), Glasgow Coma Scale (GCS) and  
19  
20 Alert Verbal Pain unresponsive scale (AVPU) were recorded.  
21  
22

23  
24 A serious injury was defined as an injury that warrants hospitalisation.(21) GCS was categorised  
25  
26 into no or mild traumatic brain injury (TBI) (13-15), moderate TBI (9-12), severe TBI (3-8).(22)  
27  
28 ED-length of stay (ED-LoS) was calculated using the date and time of arrival and the date and  
29  
30 time of discharge from the ED, either to be sent home or admitted in the hospital. Length of stay  
31  
32 in the hospital (LoS) was calculated using the data and time of admission in the hospital to the data  
33  
34 and time of discharge alive from the hospital, mortality, Leave against medical advice (LAMA) or  
35  
36 abscond. Injury severity score (ISS) was allocated retrospectively with ‘mild’ (3-8), ‘moderate’  
37  
38 (9-15), ‘severe’ (16-25) and ‘profound’ (>25) categories. Patients for whom ISS could not be  
39  
40 coded, for example when there were no recorded injuries, were assigned ‘no defined ISS’.(23) The  
41  
42 revised trauma score (RTS) was computed and categorised as  $RTS < 4$  and  $RTS > 4$ .(23,24)  
43  
44  
45

46  
47 Injuries were recorded and coded using ICD-10 in the TTRIS dataset. Patients were divided into  
48  
49 categories with respect to the most critical injury namely, crush injury, injury to internal organs,  
50  
51 blood vessel injury, amputation, fracture, dislocation, burn, multiple injury, unspecified injury,  
52  
53 open wound, superficial injury.(20) Injury characteristics of patients that presented to the ED with  
54  
55  
56  
57  
58  
59  
60

no injuries were categorized as 'no defined injury'. For patients with multiple injuries, the more critical one was considered for categorising patients as per injury.

### ***Triage as per Cape Triage Score (CTS) System***

The CTS has three versions, the adult version (those over 12 years of age or 150 cm in height), the child version (those between 3 - 12 years old or 95 - 150 cm) and the infant version (those less than 3 years of age or under 95 cm).(18) The adult CTS was used retrospectively to check for the appropriateness of the informal triage performed by the clinicians.(18) The physiological parameters were each scored against the adult Triage Early Warning Score (TEWS) scoring sheet, to calculate a total TEWS (**Table 1**). Each patient was assigned a triage level that corresponds to the TEWS score as follows: 0-2 green, 3-4 yellow, 5-6 orange, 7 or more red as seen in **Table 2**. Each patient was further categorised into the four triage levels using the Cape Triage Group (CTG) list of discriminators, also known as the South African Triage Scale (SATS) colour code. If a patient was categorised into a higher level by the SATS colour code than the TEWS score, then the higher level was considered as the correct triage level. For example, if the SATS color code categorised a patient with closed fracture into yellow, the triage level assigned to the patient would be yellow even if the TEWS score categorised the patient into green. The physiological parameters are considered for assigning triage and the discriminators are used as a safety net in case patients do not present with abnormal physiology.

**Table 1: The Cape Triage Score depicting the TEWS (18)**

|          | Adult Triage Score |              |       |         |           |                        |               |
|----------|--------------------|--------------|-------|---------|-----------|------------------------|---------------|
|          | 3                  | 2            | 1     | 0       | 1         | 2                      | 3             |
| Mobility |                    |              |       | Walking | With help | Stretcher/<br>Immobile |               |
| RR       |                    | Less than 9  |       | 9-14    | 15-20     | 21-29                  | More than 29  |
| HR       |                    | Less than 41 | 41-50 | 51-100  | 101-110   | 111-129                | More than 129 |

|        |              |       |         |                 |                |              |
|--------|--------------|-------|---------|-----------------|----------------|--------------|
| SBP    | Less than 71 | 71-80 | 81-100  | 101-199         | More than 199  |              |
| Temp.  | Less than 35 |       | 35-38.4 |                 | 38.5 or more   |              |
| AVPU   |              |       | Alert   | Reacts to Voice | Reacts to Pain | Unresponsive |
| Trauma |              |       | No      | Yes             |                |              |

---

**Over 12 years / taller than 150 cm**

---

**Table 2: The Cape Triage Score depicting the SATS color code (18)**

| Colour               | Red                  | Orange                         | Yellow           | Green              |                             |
|----------------------|----------------------|--------------------------------|------------------|--------------------|-----------------------------|
| TEWS                 | 7 or more            | 5 - 6                          | 3-4              | 0-2                |                             |
| Target time to treat | Immediate            | Less than 10 min               | Less than 60 min | Less than 240 min  |                             |
| Mechanism of injury  | High energy transfer |                                |                  |                    |                             |
| Presentation         |                      | Shortness of breath - acute    |                  | All other patients |                             |
|                      |                      | Coughing blood                 |                  |                    |                             |
|                      |                      | Chest pain                     |                  |                    |                             |
|                      |                      | Haemorrhage uncontrolled       |                  |                    | Haemorrhage - controlled    |
|                      |                      | Seizure - current              |                  |                    | Seizure-post ictal          |
|                      |                      | Focal neurology - acute        |                  |                    |                             |
|                      |                      | Level of consciousness reduced |                  |                    |                             |
|                      |                      | Psychosis/aggression           |                  |                    |                             |
|                      |                      | Threatened limb                |                  |                    |                             |
|                      |                      | Dislocation - other joint      |                  |                    | Dislocation - finger or toe |
|                      |                      | Fracture - compound            |                  |                    | Fracture - closed           |
|                      |                      | Burn over 20%                  |                  |                    | Burn - other                |
|                      |                      | Burn-face/ inhalation          |                  |                    | Burn - electrical           |
|                      |                      | Burn-circumferential           |                  |                    |                             |
|                      |                      | Burn-chemical                  |                  |                    |                             |

|                                              |                                     |                                           |                                              |      |
|----------------------------------------------|-------------------------------------|-------------------------------------------|----------------------------------------------|------|
|                                              |                                     | Poisoning/overdose                        | Abdominal pain                               |      |
|                                              | Hypoglycemia<br>glucose less than 3 | Diabetic - glucose over 11<br>& ketonuria | Diabetic - glucose over<br>17 (no ketonuria) |      |
|                                              |                                     | Vomiting - fresh blood                    | Vomiting - persistent                        |      |
|                                              |                                     | Pregnancy and abdominal<br>trauma or pain | Pregnancy and trauma                         |      |
|                                              |                                     |                                           | Pregnancy and PV bleed                       |      |
| Pain                                         |                                     | Severe                                    | Moderate                                     | Mild |
| Senior health care professional's discretion |                                     |                                           |                                              |      |

### ***Quality assurance***

There were three layers of quality control. First, data was entered using a dedicated electronic data collection instrument with extensive logical checks and prompts for unlikely but possible values. Second, the collected data were reviewed on a weekly basis and discussed during weekly online conferences with all project officers and the project leads throughout the duration of the data collection period. Third, on-site quality control sessions were conducted every 3-4 months. During these sessions, a second research officer collected data alongside the research officer who worked at the ED. The quality-controlled data was then compared with the standard data.

### ***Patient and Public Involvement***

No patients were involved.

### ***Data Analysis***

Data analysis was performed using R version 4.04 statistical software.<sup>(25)</sup> Complete case analysis was performed to exclude all patients with missing data among the variables included for analysis. Descriptive statistics were generated for all variables. The results are presented as frequencies and

percentages for categorical variables, mean and standard deviation (SD) for continuous variables and median and inter quartile range (IQR) for variables with abnormal distribution, for example LoS. The patients triaged green as per the clinician triage were further triaged as per the CTS, using the TEWS and SATS colour code into red, orange, yellow and green. The number of patients triaged green by the CTS was divided by the number of patients triaged green as per clinician triage (4135), the resultant proportion minus one was considered as the proportion of patients mis-triaged.

## RESULTS

In the study, 4151 patients were included of which 4135 (99.6%) patients were triaged green by the clinicians (**Figure 1**). The mean age of patients was  $32.8 \pm 13.1$  years with 3172 (77%) males. **Table 3** shows the physiological parameters at the time of presentation and injury characteristics as per the ISS of the study population. Notably, of all patients triaged green, 10/4135 (0.24%) patients presented with moderate to severe GCS and 0.3% of patients did not have an AVPU of alert. Majority of patients triaged green (97%) presented to the study-site directly without a primary care hospital referral. Blunt injury (98.5%) was the most common injury presentation with penetrating injury found in only 1.4% of patients. The mean (SD) revised trauma score (RTS) of these patients triaged green was 8 (0.13) with all patients having an RTS > 4.

**Table 3: Physiological and injury characteristics of patients triaged green (N=4135)**

| <b>Demographics</b>            |            |
|--------------------------------|------------|
| <i>Mechanism of Injury (%)</i> |            |
| Transport accidents            | 916 (22.2) |
| Assault                        | 870 (21)   |



|                                             |               |
|---------------------------------------------|---------------|
| Fall                                        | 856 (20.7)    |
| Other                                       | 852 (20.6)    |
| Animal bite                                 | 641 (15.5)    |
| <i>Transfer status</i>                      |               |
| Direct                                      | 4006 (97)     |
| Transferred                                 | 129 (3)       |
| <b>Vitals</b>                               |               |
| <i>AVPU (%)</i>                             |               |
| Unresponsive                                | 3 (0.1)       |
| Pain                                        | 6 (0.1)       |
| Verbal                                      | 3 (0.1)       |
| Alert                                       | 4123 (99.7)   |
| <i>GCS (mean (SD))</i>                      | 14.98 (0.4)   |
| <i>GCS (%)</i>                              |               |
| Mild                                        | 4125 (99.8)   |
| Moderate                                    | 4 (0.1)       |
| Severe                                      | 6 (0.1)       |
| <i>Systolic blood pressure (mean (SD))</i>  | 128.05 (18.9) |
| <i>Diastolic blood pressure (mean (SD))</i> | 84.34 (13.3)  |
| <i>Heart rate (mean (SD))</i>               | 88.88 (17)    |
| <i>Oxygen saturation (mean (SD))</i>        | 97.79 (2.2)   |
| <i>Respiratory rate (mean (SD))</i>         | 22.63 (3.7)   |
| <i>Need for oxygen support (%)</i>          |               |
| Not on oxygen support                       | 4135 (100.0)  |
| <i>RTS (mean (SD))</i>                      | 7.99 (0.13)   |
| <b>Injury characteristics</b>               |               |
| <i>Type of Injury (%)</i>                   |               |

|                                     |             |
|-------------------------------------|-------------|
| Blunt                               | 4075 (98.5) |
| Penetrating                         | 56 (1.4)    |
| Blunt & penetrating                 | 4 (0.1)     |
| <i>Number of serious injury (%)</i> |             |
| No serious injury                   | 4112 (99.4) |
| Single                              | 21 (0.5)    |
| Multiple                            | 2 (0.0)     |
| <i>ISS (%)</i>                      |             |
| No defined ISS                      | 2048 (49.5) |
| Mild                                | 2072 (50.1) |
| Moderate                            | 15 (0.4)    |
| Severe                              | 0 (0.0)     |
| Profound                            | 0 (0.0)     |

### *Injury Characteristics*

Of the total patients triaged green by clinicians, 46% of patients had only superficial injuries of which majority (30.8%) were due to animal bites. Further, 24% had no history or evidence of injuries on examination. Among those referred to other centers, the most common types of injury identified were superficial injuries (34) followed by open wounds (27) and patients with no documented injury (19). The reasons for referral to other centres were not documented. As per ISS, 50.2% of patients had 'mild' and 0.4% had 'moderate' score and the remaining 49.5% patients had 'no defined ISS'. **Figure 2** shows the different injury types as per mechanism of injury in the study population. Amongst those that had a transport accident, 881/916 (96.17%) were patients who had a road traffic injury.

### *Patient Outcomes*

1  
2  
3 The ED disposition of all the patients is shown in **Figure 1**. The median (IQR) length of stay (LoS)  
4 of those admitted to the hospital was 3 (13) days and seven patients required admission in the  
5 intensive care unit. Most admitted patients 62/74 (83.8%) were successfully discharged from the  
6 hospital while three were transferred to other centers for further management. Further, there were  
7 eight patients that left against medical advice and one who died during their hospital stay.  
8  
9  
10  
11  
12  
13

### 14 ***Patient Mortality***

15  
16  
17 Follow up at 30 days was successful for 3832/4135 (92.7%) of patients. Three patients died during  
18 the first 30 days. The first patient who died while in-hospital was an 80-year-old woman, who  
19 arrived at the ED 7 days after injury following a fall at ground level. With a GCS of 7 on arrival,  
20 she was admitted to the ICU with an ED-LoS of 30 minutes. Documented injury of the patient was  
21 an old contused lacerated wound on the forehead and abrasion on arm. She died within 36 hours  
22 of admission. The patient was retrospectively triaged orange as per the CTS.  
23  
24  
25  
26  
27  
28  
29  
30

31 The second patient, a 60-year-old man with a GCS of 8 was triaged green by the clinician. The  
32 patient arrived at the ED within 45 minutes of injury due to a fall from height. The patient was  
33 transferred to another centre with an ED-LoS of 1 hour 50 minutes and was alive at 24-hour  
34 follow-up but not admitted at the transferred centre at the time of follow-up. He was reported dead  
35 at 30 days follow-up and the cause of death could not be deduced from the available data. The  
36 patient was retrospectively triaged yellow as per the CTS.  
37  
38  
39  
40  
41  
42  
43  
44

45 The third patient, an 80-year-old man arrived in the ED within an hour following injury due to fall  
46 (W18) with a complaint of pain in the hip. On arrival, the patient had a GCS of 15 and oxygen  
47 saturation of 98%. The radiological findings (X-ray chest and X-ray pelvis and both hips) were  
48 normal and he was discharged from the ED with an ED-LoS of less than 3 hours. On the 30-day  
49 follow-up, the patient had died. This patient was triaged yellow as per the CTS.  
50  
51  
52  
53  
54  
55  
56  
57  
58  
59  
60

Follow up at 6 months was successful for 3597/4132 (87%) green-triaged patients. A 69 year old woman was reported dead. The patient arrived in the ED 6 days following a fall from the bed (W06) with a GCS of 15. The patient had no documented injuries and was discharged with an ED-LoS of 1 hour. The patient was retrospectively triaged yellow as per CTS. The cause of death could not be ascertained due to the non-availability of death records and autopsy findings.

### *Evaluation of triage appropriateness through retrospective Cape Triage Score (CTS)*

We found that of the total number of patients that were triaged green by clinicians (N=4135), 24 patients were triaged red, 448 patients were triaged orange and 2579 patients were triaged yellow as per CTS indicating that 73.8% patients were mistriaged by the ED clinicians. Of these, most patients (97%) were found to have been mistriaged after assessing their physiological parameters from TEWS while others due to the SATS color code for discriminators as seen in **Table 4**. In **Figure 3** the disposition of these patients from the ED as per their CTS is depicted. Notably, of the total four documented deaths, one occurred in a patient who was admitted in the hospital and triaged orange as per CTS, and one in a patient transferred to a different centre triaged yellow as per CTS.

**Table 4: Patients mistriaged as per CTS (N=4135)**

|                                   | Green | Yellow | Orange | Red |
|-----------------------------------|-------|--------|--------|-----|
| <b>Cape Triage Score</b>          | 1084  | 2579   | 448    | 24  |
| <b>Triage Early Warning Score</b> | 1084  | 2513   | 433    | 19  |
| <b>South African Triage Scale</b> | 0     | 66     | 15     | 5   |

## DISCUSSION

1  
2  
3 Our study revealed that approximately three quarters (74%) of patients informally triaged green  
4 were effectively mistriaged when compared to a validated triage system and as per CTS only  
5  
6 1084/4135 (26.2%) were triaged green. Of the patients triaged green, 94.4% were discharged from  
7  
8 the ED, apparently indicating that these patients may be coming in with presentations that do not  
9  
10 require hospital admission. Also, most of these patients (97%) were coming in as direct arrival to  
11  
12 this secondary-care hospital. This emphasises the need of on-scene triage and an effective referral  
13  
14 system in order to prevent overburdening of the EDs of the secondary and tertiary-care hospitals.  
15  
16

17  
18 Blunt trauma was seen as the most common mechanism of injury. A similar trauma mechanism  
19  
20 was noted in a pilot implementation of a trauma registry study from Pakistan.(26) Superficial  
21  
22 injury was the most frequent presentation and the predominant mechanism of injury was found to  
23  
24 be transport accidents followed by assault. These findings are similar to a study describing the  
25  
26 profile of patients presenting to the ED of a general hospital, similar to our setting, in southern  
27  
28 Ethiopia.(27) The presentation of 15.5% of patients with animal bites was unique to our setting.  
29  
30 These patients mainly presented for vaccinations following animal bites more frequently than for  
31  
32 the treatment of bite injuries.  
33  
34  
35  
36  
37

38  
39 Only 2.6% of green-triaged patients were referred to other centers for further management. This  
40  
41 referral rate is low in comparison to a study from southern Ethiopia that reported a rate of  
42  
43 5.2%.(27) However, in our study, it is worth noting that most patients who were referred to higher  
44  
45 centres only had superficial, open wounds, or no defined injuries. So, it is difficult to assume if  
46  
47 these transfers were genuinely warranted or could have been managed in the same hospital.  
48  
49 Additionally, transfers due to overcrowding during specific hours of the day, overwhelming the  
50  
51 existing infrastructure, resources or manpower at that particular time, may be a possibility.  
52  
53  
54  
55  
56  
57  
58  
59  
60

1  
2  
3 Overcrowding of the ED, with limitation of resources, seems to be an important factor for  
4 inadequate trauma care.(28) This makes triaging crucial which enables intensifying the efforts  
5 towards patients requiring immediate interventions and quick management and disposition of the  
6 less urgent patients. Physiological parameters are most frequently used by clinicians to triage  
7 patients in India owing to lack of access to investigations such as CT scan during all times of the  
8 day. These on-arrival parameters are also known to be the most effective in the case of low-  
9 resource settings in predicting patient outcomes.(28) Our study found that 10/4135 (0.24%)  
10 patients that reported GCS moderate to severe and 0.3% of patients did not have an AVPU of alert  
11 and were still triaged green. This indicates that among the green triaged patients with close to  
12 normal physiological parameters, there were patients that required urgent attention. Although the  
13 proportion of these patients is relatively low compared to our sample size, reasons for these patients  
14 being inappropriately triaged must be explored extensively to enhance healthcare delivery in  
15 Indian EDs. Although the reasons for mistriaging are multifactorial, in this case, the lack of  
16 appropriate training or standard, uniform protocol for patient management in the ED to quickly  
17 identify these patients among those that have normal physiological parameters is most evident.  
18 Additionally, these findings highlight the efficacy of physiological scores such as TEWS, a  
19 component of CTS in triaging patients accurately and the need to include GCS assessment for all  
20 patients presenting to the ED. Furthermore, vital signs-based prediction models have been found  
21 to be beneficial for busy resource-limited public hospitals in urban India, where access to imaging  
22 modalities is not available around-the-clock.(29)

23  
24  
25  
26  
27  
28  
29  
30  
31  
32  
33  
34  
35  
36  
37  
38  
39  
40  
41  
42  
43  
44  
45  
46  
47  
48  
49  
50 This need for reinforcement of adequate formal triage training is strengthened by our finding that  
51 as per CTS, nearly three-quarters (74%) of patients were mistriaged green of which, most (97%)  
52 were ascertained by their Triage Early Warning Score (TEWS), that takes into account  
53  
54  
55  
56  
57  
58  
59  
60

1  
2  
3 physiological parameters. In addition, of those admitted, seven required admission to the ICU  
4 indicating they may have required urgent management for their condition. On a closer look at the  
5 triage category denoted by clinicians at the three patients found dead on 30-day follow-up, it was  
6 seen that two of them were under triaged on initial evaluation of physiological parameters as they  
7 had a GCS < 8. Further, in our study, retrospective triage using a physiological score reveals its  
8 benefits if implemented in a low-resource setting as seen with TEWS, which identified the majority  
9 of patients mistriaged (Table 4). Including appropriate triage training for CMO's when  
10 implementing reforms in trauma management is a key step towards improving outcomes in trauma  
11 patients. This requires prioritisation of meticulous evaluation of the initial vital parameters by the  
12 ED staff to reduce errors and improve outcomes, in addition to addressing other contributing  
13 factors such as the low clinician to patient ratio in Indian EDs.  
14  
15  
16  
17  
18  
19  
20  
21  
22  
23  
24  
25  
26  
27  
28

29 This prospective cohort study is one of the largest studies done in an LMIC setting, conducted for  
30 3.5 years that provides robust data from a secondary care hospital in Mumbai. The hospital serves  
31 patients directly presenting to the ED and also patients that are referred from primary and other  
32 secondary care centres. This is also the first study from India that provides an in-depth profile and  
33 outcomes of patients triaged green in a low-resource hospital setting. However, this study has  
34 limitations. Firstly, the study provides data from a single secondary care centre, results of which  
35 may not be generalisable to other secondary care hospitals or other Indian healthcare settings, due  
36 to hospital bias. Secondly, to ensure feasibility, data of only 10 consecutive patients were collected  
37 in each shift. Due to which we do not have data of all the patients coming to the ED. Thirdly, we  
38 did not have data from autopsy reports of individuals that died to ascertain their exact cause of  
39 death. Lastly, we have data only on mortality of the patients but no additional data documenting  
40  
41  
42  
43  
44  
45  
46  
47  
48  
49  
50  
51  
52  
53  
54  
55  
56  
57  
58  
59  
60

1  
2  
3 the morbidity. This is a limiting factor towards assessing the morbidity gains after implementation  
4  
5 of triage training.  
6  
7

## 8 9 **CONCLUSION**

10  
11 Three-fourths (74%) of the patients triaged green by clinicians in a secondary care hospital in  
12  
13 Mumbai were mistriaged when retrospectively analysed using CTS. This highlights the need for  
14  
15 implementation and evaluation of trauma triage training for the in-hospital first responders  
16  
17 (clinicians, nurses and other paramedical staff) in the EDs. Also, direct admissions of the non-  
18  
19 urgent patients to this secondary-care hospital warrants strengthening the referral systems to avoid  
20  
21 overcrowding of the Indian EDs.  
22  
23  
24  
25  
26  
27

## 28 29 **LIST OF ABBREVIATIONS**

30  
31 Emergency department (ED), Cape Triage Score (CTS), Low- and Middle-Income Country  
32  
33 (LMIC), Trauma Triage Study in India (TTRIS), Khurshedji Behramji Bhabha Hospital (KBBH),  
34  
35 Computerized Tomography (CT), Casualty Medical Officer (CMO), International Classification  
36  
37 of Disease version 10 (ICD-10), Injury Severity Score (ISS), systolic blood pressure (SBP),  
38  
39 respiratory rate (RR), heart rate (HR), peripheral capillary oxygen saturation (SpO<sub>2</sub>), Glasgow  
40  
41 Coma Scale (GCS), Alert Verbal Pain unresponsive scale (AVPU), Traumatic Brain Injury (TBI),  
42  
43 ED-length of stay (ED-LoS), Length of stay in the hospital (LoS), Leave against medical advice  
44  
45 (LAMA), Revised Trauma Score (RTS), Triage Early Warning Score (TEWS), South African  
46  
47 Triage Scale (SATS), Standard deviation (SD), Inter quartile range (IQR)  
48  
49  
50  
51  
52  
53

## 54 55 **DECLARATIONS**

56  
57  
58  
59  
60



### ***Ethical clearance***

Ethics committee approval for TTRIS was obtained from the ethics and scientific committee of KBBH (KBBH, HO/4982/KBB,12/08/2016). Informed consent for follow-up was taken from patients at the time of discharge from the hospital. In case the patient was unconscious, consent was obtained from a family member or the patient's legally acceptable representative.

### ***Consent for publication***

Not Applicable

### ***Availability of data and materials***

The data are available to whoever wants them by emailing the corresponding author. They can write their aims and objectives, and then, the authors can decide if that study can be done without duplication of the work.

### ***Competing Interests***

There is no conflict of interest to disclose from any of the authors

### ***Funding***

The data collection for TTRIS was funded by grants from the Swedish National Board of Health and Welfare, grant numbers 22464/2017 and 23745/2016.

### ***Author Contribution***

Authors AA, RD, BS, SD and MGW have conceptualized the study. AA and RD analysed the data and AA, RD, BS were involved in the interpretation of the data and manuscript writing. GR, NR, MK, JA, KDS, NS, MM, AG, NR, and MGW contributed to the study design and critical revisions to the manuscript. All authors have contributed to drafting the article and revising it. They also approved the final version of the manuscript. All authors agree to be responsible for all aspects of the work.

### *Acknowledgments*

We thank the Thursday Truth Seekers (TTS) and the Trauma Triage Study in India (TTRIS), India, research team for their support.

### **REFERENCES**

1. GBD 2017 Causes of Death Collaborators. Global, regional, and national age-sex-specific mortality for 282 causes of death in 195 countries and territories, 1980-2017: a systematic analysis for the Global Burden of Disease Study 2017. *Lancet* (London, England) [Internet]. 2018 Nov 10 [cited 2021 Aug 23];392(10159):1736–88. Available from: <https://pubmed.ncbi.nlm.nih.gov/30496103/>
2. World Health Organization. WHO country cooperation strategy at a glance : India. 2018. Available from: <https://apps.who.int/iris/handle/10665/136895>
3. Government of India. Ministry of Road Transport & Highways Transport Research Wing. Road Accidents in India 2019. 2019; Available from: [https://morth.nic.in/sites/default/files/RA\\_Uploading.pdf](https://morth.nic.in/sites/default/files/RA_Uploading.pdf)
4. G G. Injuries in India: A national perspective. *Burden of Disease in India Equitable Development - Healthy Future New Delhi: National Commission on Macroeconomics and Health, Ministry of Health & Family Welfare, Government of India.* 2005;325–347. Available from: [http://www.drbramedkarcollege.ac.in/sites/default/files/Burden\\_of\\_disease\\_in\\_India.pdf#page=343](http://www.drbramedkarcollege.ac.in/sites/default/files/Burden_of_disease_in_India.pdf#page=343)
5. Fitzgerald M, Cameron P, Mackenzie C, Farrow N, Scicluna P, Gocentas R, et al. Trauma resuscitation errors and computer-assisted decision support. *Archives of surgery*

1  
2  
3 (Chicago, Ill : 1960) [Internet]. 2011 Feb [cited 2021 Aug 23];146(2):218–25. Available  
4  
5 from: <https://pubmed.ncbi.nlm.nih.gov/21339436/>  
6

7  
8  
9 6. Cameron P, Gabbe B, Smith K, Mitra B. Triaging the right patient to the right place  
10  
11 in the shortest time. *British journal of anaesthesia* [Internet]. 2014 [cited 2021 Aug  
12  
13 23];113(2):226–33. Available from: <https://pubmed.ncbi.nlm.nih.gov/24961786/>  
14

15  
16  
17 7. Twomey M, Wallis LA, Thompson M lou, Myers JE. The South African Triage  
18  
19 Scale (adult version) provides reliable acuity ratings. *International emergency nursing*  
20  
21 [Internet]. 2012 Jul [cited 2021 Aug 23];20(3):142–50. Available from:  
22  
23 <https://pubmed.ncbi.nlm.nih.gov/22726946/>  
24

25  
26  
27 8. Ebrahimi M, Heydari A, Mazlom R, Mirhaghi A. The reliability of the Australasian  
28  
29 Triage Scale: a meta-analysis. *World journal of emergency medicine* [Internet]. 2015 [cited  
30  
31 2021 Aug 23];6(2):94. Available from: <https://pubmed.ncbi.nlm.nih.gov/26056538/>  
32  
33

34  
35 9. Roy N, Murlidhar V, Chowdhury R, Patil SB, Supe PA, Vaishnav PD, et al. Where  
36  
37 there are no emergency medical services-prehospital care for the injured in Mumbai, India.  
38  
39 *Prehospital and disaster medicine* [Internet]. 2010 [cited 2021 Aug 23];25(2):145–51.  
40  
41 Available from: <https://pubmed.ncbi.nlm.nih.gov/20467994/>  
42  
43

44  
45 10. Woolard RH, Borron SW MJM. Emergency Department Design. In: *Ciottone's*  
46  
47 *Disaster Medicine*. Elsevier. 2016;125–130.  
48  
49

50  
51 11. Kumar S, Kumar S, Gupta B. Urban health: Needs urgent attention. *Indian journal*  
52  
53 *of public health* [Internet]. 2018 Jul 1 [cited 2021 Aug 23];62(3):214–7. Available from:  
54  
55 <https://pubmed.ncbi.nlm.nih.gov/30232971/>  
56  
57

- 1  
2  
3 12. Bashar MA, Bhattacharya S, Tripathi S, Sharma N, Singh A. Strengthening primary  
4 health care through e-referral system. *Journal of family medicine and primary care*  
5 [Internet]. 2019 [cited 2021 Aug 23];8(4):1511–3. Available from:  
6 <https://pubmed.ncbi.nlm.nih.gov/31143753/>  
7  
8  
9  
10  
11  
12  
13 13. Gidwani S, Jena NN. Perspective article for *European Journal of Emergency*  
14 *Medicine: emergency medicine in India*. *European journal of emergency medicine : official*  
15 *journal of the European Society for Emergency Medicine* [Internet]. 2020 [cited 2021 Aug  
16 23];27(5):317–8. Available from: <https://pubmed.ncbi.nlm.nih.gov/32852409/>  
17  
18  
19  
20  
21  
22  
23 14. McHugh M, Tanabe P, McClelland M, Khare RK. More patients are triaged using  
24 the Emergency Severity Index than any other triage acuity system in the United States.  
25 *Academic emergency medicine : official journal of the Society for Academic Emergency*  
26 *Medicine* [Internet]. 2012 Jan [cited 2021 Aug 23];19(1):106–9. Available from:  
27 <https://pubmed.ncbi.nlm.nih.gov/22211429/>  
28  
29  
30  
31  
32  
33  
34  
35  
36 15. Gerdin LW, Khajanchi M, Kumar V, Roy N, Saha ML, Soni KD, et al. Comparison  
37 of emergency department trauma triage performance of clinicians and clinical prediction  
38 models: a cohort study in India. *BMJ open* [Internet]. 2020 Feb 18 [cited 2021 Aug  
39 23];10(2). Available from: <https://pubmed.ncbi.nlm.nih.gov/32075827/>  
40  
41  
42  
43  
44  
45  
46 16. Kumar A, Lakshminarayanan D, Joshi N, Vaid S, Bhoi S, Deorari A. Triageing the  
47 triage: reducing waiting time to triage in the emergency department at a tertiary care hospital  
48 in New Delhi, India. *Emergency medicine journal : EMJ* [Internet]. 2019 Sep 1 [cited 2021  
49 Aug 23];36(9):558–63. Available from: <https://pubmed.ncbi.nlm.nih.gov/31366625/>  
50  
51  
52  
53  
54  
55  
56  
57  
58  
59  
60

- 1  
2  
3 17. Mahajan V, Arora S, Kaur T, Gupta S, Guglani V. Unexpected hospitalisations at  
4 a 23-hour observation unit in a paediatric emergency department of northern India. *Journal*  
5 *of clinical and diagnostic research : JCDR* [Internet]. 2013 Jul 1 [cited 2021 Aug  
6 23];7(7):1418–20. Available from: <https://pubmed.ncbi.nlm.nih.gov/23998079/>  
7  
8  
9  
10  
11  
12  
13 18. Rominski S, Bell SA, Oduro G, Among P, Oteng R, Donkor P. The  
14 implementation of the South African Triage Score (SATS) in an urban teaching hospital,  
15 Ghana. *African journal of emergency medicine : Revue africaine de la medecine d'urgence*  
16 [Internet]. 2014 [cited 2021 Aug 23];4(2):71–5. Available from:  
17 <https://pubmed.ncbi.nlm.nih.gov/28344927/>  
18  
19  
20  
21  
22  
23  
24  
25  
26 19. Bruijns SR, Wallis LA, Burch VC. A prospective evaluation of the Cape triage  
27 score in the emergency department of an urban public hospital in South Africa. *Emergency*  
28 *medicine journal : EMJ* [Internet]. 2008 Jul [cited 2021 Aug 23];25(7):398–402. Available  
29 from: <https://pubmed.ncbi.nlm.nih.gov/18573947/>  
30  
31  
32  
33  
34  
35  
36 20. World Health Organization. The international statistical classification of diseases  
37 and health related problems ICD-10: Tabular list v. 1: Tenth revision. 5th ed. Genève,  
38 Switzerland: World Health Organization. 2016;  
39  
40  
41  
42  
43  
44 21. Gardner A, Forson PK, Oduro G, Stewart B, Dike N, Glover P, et al. Diagnostic  
45 accuracy of the Kampala Trauma Score using estimated Abbreviated Injury Scale scores  
46 and physician opinion. *Injury* [Internet]. 2017 Jan 1 [cited 2021 Aug 23];48(1):177–83.  
47 Available from: <https://pubmed.ncbi.nlm.nih.gov/27908493/>  
48  
49  
50  
51  
52  
53  
54  
55  
56  
57  
58  
59  
60

- 1  
2  
3 22. Mena JH, Sanchez AI, Rubiano AM, Peitzman AB, Sperry JL, Gutierrez MI, et al.  
4 Effect of the modified Glasgow Coma Scale score criteria for mild traumatic brain injury  
5 on mortality prediction: comparing classic and modified Glasgow Coma Scale score model  
6 scores of 13. *The Journal of trauma* [Internet]. 2011 Nov [cited 2021 Aug 23];71(5):1185–  
7 93. Available from: <https://pubmed.ncbi.nlm.nih.gov/22071923/>  
8  
9  
10  
11  
12  
13  
14  
15 23. Javali RH, Krishnamoorthy, Patil A, Srinivasarangan M, Suraj, Sriharsha.  
16 Comparison of Injury Severity Score, New Injury Severity Score, Revised Trauma Score  
17 and Trauma and Injury Severity Score for Mortality Prediction in Elderly Trauma Patients.  
18 *Indian journal of critical care medicine*: peer-reviewed, official publication of Indian  
19 Society of Critical Care Medicine [Internet]. 2019 [cited 2021 Aug 23];23(2):73–7.  
20 Available from: <https://pubmed.ncbi.nlm.nih.gov/31086450/>  
21  
22  
23  
24  
25  
26  
27  
28  
29  
30 24. Champion HR, Sacco WJ, Copes WS, Gann DS, Gennarelli TA, Flanagan ME. A  
31 revision of the Trauma Score. *The Journal of trauma* [Internet]. 1989 [cited 2021 Aug  
32 23];29(5):623–9. Available from: <https://pubmed.ncbi.nlm.nih.gov/2657085/>  
33  
34  
35  
36  
37  
38 25. R Core Team. R: A Language and Environment for Statistical Computing. Vienna,  
39 Austria: R Foundation for Statistical Computing. 2020; Available from: [https://www.r-](https://www.r-project.org/)  
40 [project.org/](https://www.r-project.org/)  
41  
42  
43  
44  
45  
46 26. Mehmood A, Razzak JA, Kabir S, Mackenzie EJ, Hyder AA. Development and  
47 pilot implementation of a locally developed Trauma Registry: lessons learnt in a low-  
48 income country. *BMC emergency medicine* [Internet]. 2013 Mar 21 [cited 2021 Aug  
49 23];13(1):4. Available from: <https://pubmed.ncbi.nlm.nih.gov/23517344/>  
50  
51  
52  
53  
54  
55  
56  
57  
58  
59  
60

- 1  
2  
3 27. Negussie A, Getie A, Manaye E, Tekle T. Prevalence and outcome of injury in  
4 patients visiting the emergency Department of Yirgalem General Hospital, Southern  
5 Ethiopia. BMC emergency medicine [Internet]. 2018 May 22 [cited 2021 Aug 23];18(1):14.  
6 Available from: <https://pubmed.ncbi.nlm.nih.gov/29788913/>  
7  
8  
9  
10  
11  
12  
13 28. Sarang B, Bhandarkar P, Raykar N, O'Reilly GM, Soni KD, Wörnberg MG, et al.  
14 Associations of On-arrival Vital Signs with 24-hour In-hospital Mortality in Adult Trauma  
15 Patients Admitted to Four Public University Hospitals in Urban India: A Prospective Multi-  
16 Centre Cohort Study. Injury [Internet]. 2021 May 1 [cited 2021 Aug 23];52(5):1158–63.  
17 Available from: <https://pubmed.ncbi.nlm.nih.gov/33685640/>  
18  
19  
20  
21  
22  
23  
24  
25  
26 29. M G, N R, M K, V K, S D, L F-T, et al. Predicting early mortality in adult trauma  
27 patients admitted to three public university hospitals in urban India: a prospective  
28 multicentre cohort study. PloS one [Internet]. 2014 [cited 2021 Aug 23];9(9). Available  
29 from: <https://pubmed.ncbi.nlm.nih.gov/25180494/>  
30  
31  
32  
33  
34  
35

36 **Figure 1: Study Flowchart**

37  
38 **Figure 2: Percentage distribution of different injury mechanisms among injury types (N =**  
39 **4135)**

40  
41  
42  
43 **Figure 3: Patients' disposition from ED as per retrospective triage using CTS (N=4135)**  
44  
45  
46  
47  
48  
49  
50  
51  
52  
53  
54  
55  
56  
57  
58  
59  
60

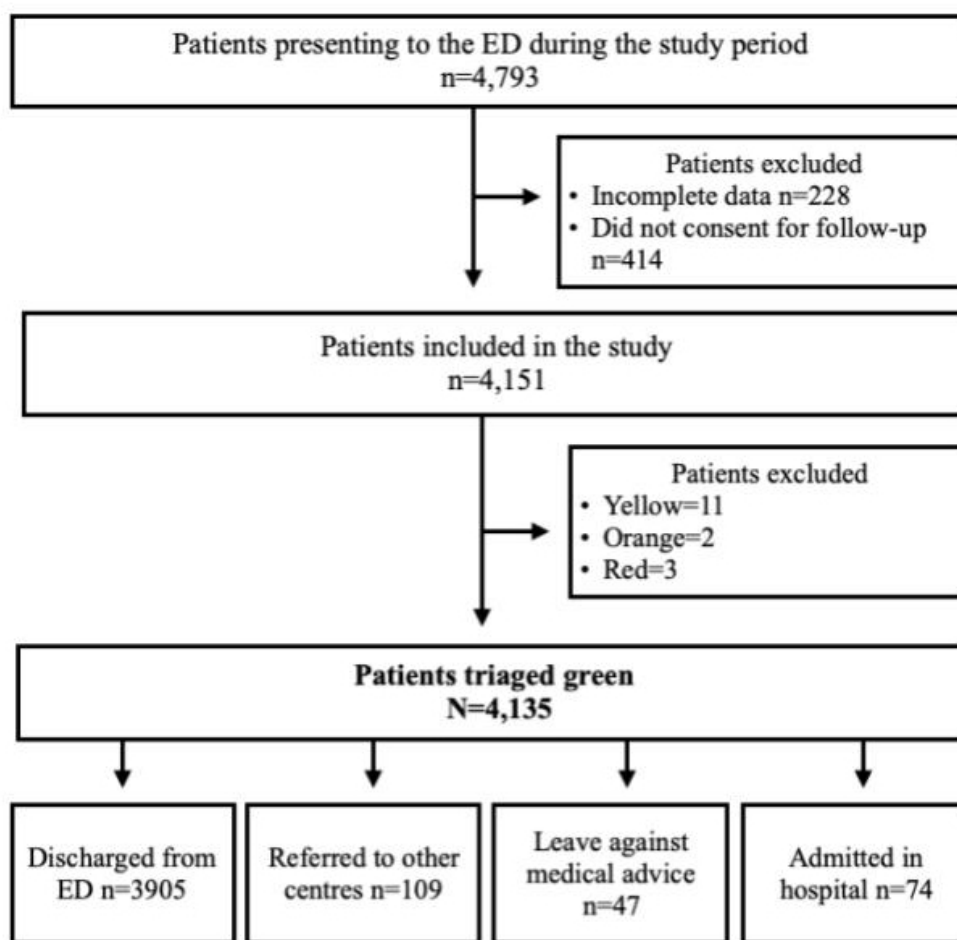

Figure 1: Study Flowchart

52x51mm (300 x 300 DPI)



1  
2  
3  
4  
5  
6  
7  
8  
9  
10  
11  
12  
13  
14  
15  
16  
17  
18  
19  
20  
21  
22  
23  
24  
25  
26  
27  
28  
29  
30  
31  
32  
33  
34  
35  
36  
37  
38  
39  
40  
41  
42  
43  
44  
45  
46  
47  
48  
49  
50  
51  
52  
53  
54  
55  
56  
57  
58  
59  
60

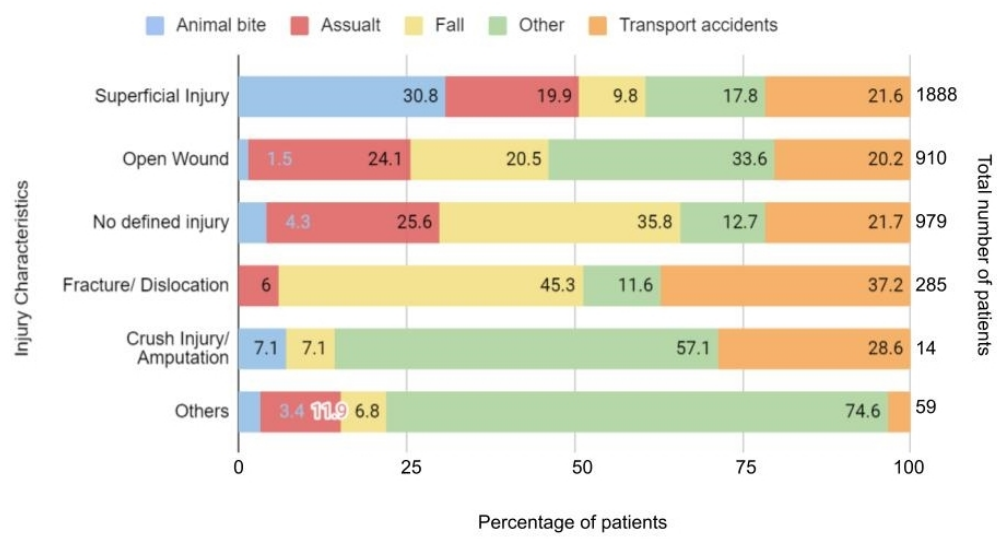

Figure 2: Percentage distribution of different injury mechanisms among injury types (N = 4135)  
77x41mm (300 x 300 DPI)

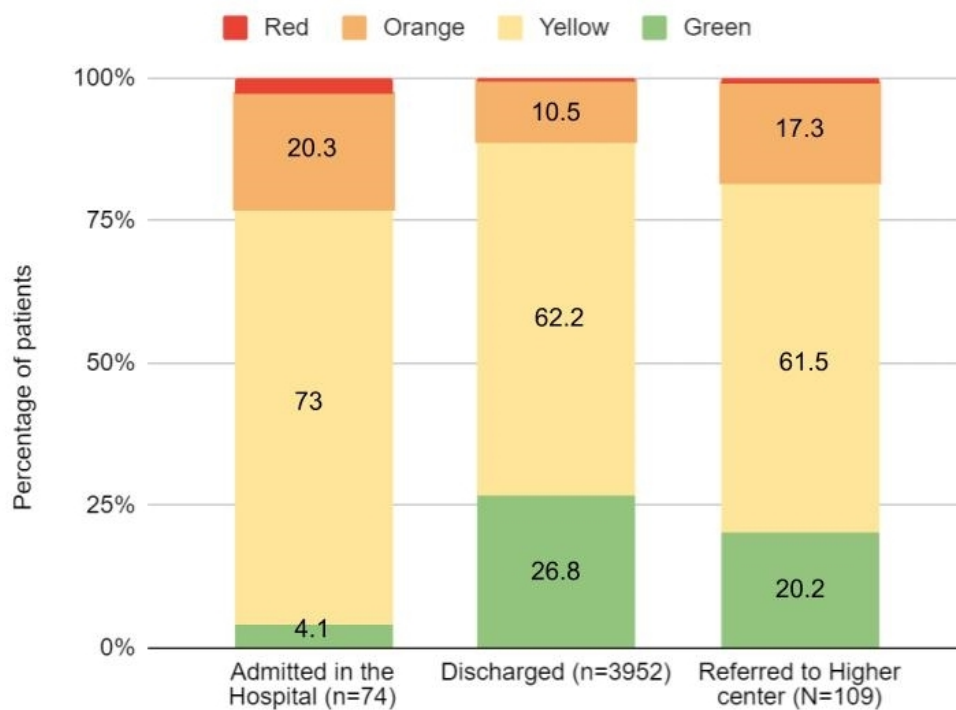

Figure 3: Patients' disposition from ED as per retrospective triage using CTS (N=4135)

61x46mm (300 x 300 DPI)

### Supplementary material

Table of excluded International Classification of Diseases version 10 (ICD-10) codes

| ICD-10 code | Short description     | Full description                                                                   |
|-------------|-----------------------|------------------------------------------------------------------------------------|
| W65         | Other external causes | Drowning and submersion while in bath-tub                                          |
| W67         | Other external causes | Drowning and submersion while in swimming-pool                                     |
| W68         | Other external causes | Drowning and submersion following fall into swimming-pool                          |
| W69         | Other external causes | Drowning and submersion while in natural water                                     |
| W70         | Other external causes | Drowning and submersion following fall into natural water                          |
| W73         | Other external causes | Other specified drowning and submersion                                            |
| W74         | Other external causes | Unspecified drowning and submersion                                                |
| W78         | Other external causes | Inhalation of gastric contents                                                     |
| W79         | Other external causes | Inhalation and ingestion of food causing obstruction of respiratory tract          |
| W80         | Other external causes | Inhalation and ingestion of other objects causing obstruction of respiratory tract |
| W81         | Other external causes | Confined to or trapped in a low-oxygen environment                                 |
| W83         | Other external causes | Other specified threats to breathing                                               |

|    |             |                       |                                                                                                                                             |
|----|-------------|-----------------------|---------------------------------------------------------------------------------------------------------------------------------------------|
| 1  |             |                       |                                                                                                                                             |
| 2  |             |                       |                                                                                                                                             |
| 3  |             |                       |                                                                                                                                             |
| 4  | W84         | Other external causes | Unspecified threat to breathing                                                                                                             |
| 5  |             |                       |                                                                                                                                             |
| 6  |             |                       |                                                                                                                                             |
| 7  | X20         | Other external causes | Contact with venomous snakes and lizards                                                                                                    |
| 8  |             |                       |                                                                                                                                             |
| 9  |             |                       |                                                                                                                                             |
| 10 | ICD-10 code | Short description     | Full description                                                                                                                            |
| 11 |             |                       |                                                                                                                                             |
| 12 | X21         | Other external causes | Contact with venomous spiders                                                                                                               |
| 13 |             |                       |                                                                                                                                             |
| 14 |             |                       |                                                                                                                                             |
| 15 | X22         | Other external causes | Contact with scorpions                                                                                                                      |
| 16 |             |                       |                                                                                                                                             |
| 17 | X23         | Other external causes | Contact with hornets, wasps and bees                                                                                                        |
| 18 |             |                       |                                                                                                                                             |
| 19 |             |                       |                                                                                                                                             |
| 20 | X24         | Other external causes | Contact with centipedes and venomous millipedes (tropical)                                                                                  |
| 21 |             |                       |                                                                                                                                             |
| 22 |             |                       |                                                                                                                                             |
| 23 | X25         | Other external causes | Contact with other venomous arthropods                                                                                                      |
| 24 |             |                       |                                                                                                                                             |
| 25 | X26         | Other external causes | Contact with venomous marine animals and plants                                                                                             |
| 26 |             |                       |                                                                                                                                             |
| 27 |             |                       |                                                                                                                                             |
| 28 | X27         | Other external causes | Contact with other specified venomous animals                                                                                               |
| 29 |             |                       |                                                                                                                                             |
| 30 |             |                       |                                                                                                                                             |
| 31 | X28         | Other external causes | Contact with other specified venomous plants                                                                                                |
| 32 |             |                       |                                                                                                                                             |
| 33 | X29         | Other external causes | Contact with unspecified venomous animal or plant                                                                                           |
| 34 |             |                       |                                                                                                                                             |
| 35 |             |                       |                                                                                                                                             |
| 36 | X40         | Other external causes | Accidental poisoning by and exposure to nonopioid analgesics, antipyretics and antirheumatics                                               |
| 37 |             |                       |                                                                                                                                             |
| 38 | X41         | Other external causes | Accidental poisoning by and exposure to antiepileptic, sedative-hypnotic, antiparkinsonism and psychotropic drugs, not elsewhere classified |
| 39 |             |                       |                                                                                                                                             |
| 40 |             |                       |                                                                                                                                             |
| 41 | X42         | Other external causes | Accidental poisoning by and exposure to narcotics and psychodysleptics [hallucinogens], not elsewhere classified                            |
| 42 |             |                       |                                                                                                                                             |
| 43 |             |                       |                                                                                                                                             |
| 44 |             |                       |                                                                                                                                             |
| 45 |             |                       |                                                                                                                                             |
| 46 |             |                       |                                                                                                                                             |
| 47 |             |                       |                                                                                                                                             |

1  
2  
3  
4  
5  
6  
7  
8  
9  
10  
11  
12  
13  
14  
15  
16  
17  
18  
19  
20  
21  
22  
23  
24  
25  
26  
27  
28  
29  
30  
31  
32  
33  
34  
35  
36  
37  
38  
39  
40  
41  
42  
43  
44  
45  
46  
47

| X43         | Other external causes | Accidental poisoning by and exposure to other drugs acting on the autonomic nervous system                 |
|-------------|-----------------------|------------------------------------------------------------------------------------------------------------|
| X44         | Other external causes | Accidental poisoning by and exposure to other and unspecified drugs, medicaments and biological substances |
| X45         | Other external causes | Accidental poisoning by and exposure to alcohol                                                            |
| X46         | Other external causes | Accidental poisoning by and exposure to organic solvents and halogenated hydrocarbons and their vapours    |
| ICD-10 code | Short description     | Full description                                                                                           |
| X47         | Other external causes | Accidental poisoning by and exposure to other gases and vapours                                            |
| X48         | Other external causes | Accidental poisoning by and exposure to pesticides                                                         |
| X49         | Other external causes | Accidental poisoning by and exposure to other and unspecified chemicals and noxious substances             |
| X50         | Other external causes | Overexertion and strenuous or repetitive movements                                                         |
| X51         | Other external causes | Travel and motion                                                                                          |
| X52         | Other external causes | Prolonged stay in weightless environment                                                                   |
| X53         | Other external causes | Lack of food                                                                                               |
| X54         | Other external causes | Lack of water                                                                                              |
| X57         | Other external causes | Unspecified privation                                                                                      |
| X60         | Intentional self-harm | Intentional self-poisoning by and exposure to nonopioid analgesics, antipyretics and antirheumatics        |

|    |             |                       |                                                                                                                                                   |
|----|-------------|-----------------------|---------------------------------------------------------------------------------------------------------------------------------------------------|
| 1  |             |                       |                                                                                                                                                   |
| 2  |             |                       |                                                                                                                                                   |
| 3  |             |                       |                                                                                                                                                   |
| 4  | X61         | Intentional self-harm | Intentional self-poisoning by and exposure to antiepileptic, sedative-hypnotic, antiparkinsonism and psychotropic drugs, not elsewhere classified |
| 5  |             |                       |                                                                                                                                                   |
| 6  |             |                       |                                                                                                                                                   |
| 7  | X62         | Intentional self-harm | Intentional self-poisoning by and exposure to narcotics and psychodysleptics [hallucinogens], not elsewhere classified                            |
| 8  |             |                       |                                                                                                                                                   |
| 9  |             |                       |                                                                                                                                                   |
| 10 | X63         | Intentional self-harm | Intentional self-poisoning by and exposure to other drugs acting on the autonomic nervous system                                                  |
| 11 |             |                       |                                                                                                                                                   |
| 12 | X64         | Intentional self-harm | Intentional self-poisoning by and exposure to other and unspecified drugs, medicaments and biological substances                                  |
| 13 |             |                       |                                                                                                                                                   |
| 14 |             |                       |                                                                                                                                                   |
| 15 | X65         | Intentional self-harm | Intentional self-poisoning by and exposure to alcohol                                                                                             |
| 16 |             |                       |                                                                                                                                                   |
| 17 | X66         | Intentional self-harm | Intentional self-poisoning by and exposure to organic solvents and halogenated hydrocarbons and their vapours                                     |
| 18 |             |                       |                                                                                                                                                   |
| 19 |             |                       |                                                                                                                                                   |
| 20 | ICD-10 code | Short description     | Full description                                                                                                                                  |
| 21 | <hr/>       |                       |                                                                                                                                                   |
| 22 | X67         | Intentional self-harm | Intentional self-poisoning by and exposure to other gases and vapours                                                                             |
| 23 |             |                       |                                                                                                                                                   |
| 24 |             |                       |                                                                                                                                                   |
| 25 | X68         | Intentional self-harm | Intentional self-poisoning by and exposure to pesticides                                                                                          |
| 26 |             |                       |                                                                                                                                                   |
| 27 |             |                       |                                                                                                                                                   |
| 28 | X69         | Intentional self-harm | Intentional self-poisoning by and exposure to other and unspecified chemicals and noxious substances                                              |
| 29 |             |                       |                                                                                                                                                   |
| 30 | X85         | Assault               | Assault by drugs, medicaments and biological substances                                                                                           |
| 31 |             |                       |                                                                                                                                                   |
| 32 |             |                       |                                                                                                                                                   |
| 33 | X88         | Assault               | Assault by gases and vapours                                                                                                                      |
| 34 |             |                       |                                                                                                                                                   |
| 35 | X89         | Assault               | Assault by other specified chemicals and noxious substances                                                                                       |
| 36 |             |                       |                                                                                                                                                   |
| 37 | X90         | Assault               | Assault by unspecified chemical or noxious substance                                                                                              |
| 38 | Y06         | Assault               | Neglect and abandonment                                                                                                                           |
| 39 |             |                       |                                                                                                                                                   |
| 40 | Y060        | Assault               | Neglect and abandonment by spouse or partner                                                                                                      |
| 41 |             |                       |                                                                                                                                                   |
| 42 |             |                       |                                                                                                                                                   |
| 43 |             |                       |                                                                                                                                                   |
| 44 |             |                       |                                                                                                                                                   |
| 45 |             |                       |                                                                                                                                                   |
| 46 |             |                       |                                                                                                                                                   |
| 47 |             |                       |                                                                                                                                                   |

|    |             |                       |                                                                                                                       |
|----|-------------|-----------------------|-----------------------------------------------------------------------------------------------------------------------|
| 1  |             |                       |                                                                                                                       |
| 2  |             |                       |                                                                                                                       |
| 3  |             |                       |                                                                                                                       |
| 4  | Y061        | Assault               | Neglect and abandonment by parent                                                                                     |
| 5  | Y062        | Assault               | Neglect and abandonment by acquaintance or friend                                                                     |
| 6  |             |                       |                                                                                                                       |
| 7  | Y068        | Assault               | Neglect and abandonment by other specified persons                                                                    |
| 8  |             |                       |                                                                                                                       |
| 9  | Y069        | Assault               | Neglect and abandonment by unspecified person                                                                         |
| 10 |             |                       |                                                                                                                       |
| 11 | Y07         | Assault               | Other maltreatment                                                                                                    |
| 12 | Y070        | Assault               | Other maltreatment by spouse or partner                                                                               |
| 13 |             |                       |                                                                                                                       |
| 14 | Y071        | Assault               | Other maltreatment by parent                                                                                          |
| 15 |             |                       |                                                                                                                       |
| 16 | Y072        | Assault               | Other maltreatment by acquaintance or friend                                                                          |
| 17 | Y073        | Assault               | Other maltreatment by official authorities                                                                            |
| 18 |             |                       |                                                                                                                       |
| 19 | Y078        | Assault               | Other maltreatment by other specified persons                                                                         |
| 20 |             |                       |                                                                                                                       |
| 21 | Y079        | Assault               | Other maltreatment by unspecified person                                                                              |
| 22 |             | Event of undetermined |                                                                                                                       |
| 23 | Y10         | intent                | Poisoning by and exposure to nonopioid analgesics, antipyretics and antirheumatics, undetermined intent               |
| 24 |             |                       |                                                                                                                       |
| 25 | ICD-10 code | Short description     | Full description                                                                                                      |
| 26 |             |                       |                                                                                                                       |
| 27 | Y11         | Event of undetermined | Poisoning by and exposure to antiepileptic, sedative-hypnotic, antiparkinsonism and psychotropic drugs, not elsewhere |
| 28 |             | intent                | classified, undetermined intent                                                                                       |
| 29 |             |                       |                                                                                                                       |
| 30 | Y12         | Event of undetermined | Poisoning by and exposure to narcotics and psychodysleptics [hallucinogens], not elsewhere classified, undetermined   |
| 31 |             | intent                | intent                                                                                                                |
| 32 |             |                       |                                                                                                                       |
| 33 |             |                       |                                                                                                                       |
| 34 | Y13         | Event of undetermined | Poisoning by and exposure to other drugs acting on the autonomic nervous system, undetermined intent                  |
| 35 |             | intent                |                                                                                                                       |
| 36 |             |                       |                                                                                                                       |
| 37 |             |                       |                                                                                                                       |
| 38 | Y14         | Event of undetermined | Poisoning by and exposure to other and unspecified drugs, medicaments and biological substances, undetermined intent  |
| 39 |             | intent                |                                                                                                                       |
| 40 |             |                       |                                                                                                                       |
| 41 |             |                       |                                                                                                                       |
| 42 |             |                       |                                                                                                                       |
| 43 |             |                       |                                                                                                                       |
| 44 |             |                       |                                                                                                                       |
| 45 |             |                       |                                                                                                                       |
| 46 |             |                       |                                                                                                                       |
| 47 |             |                       |                                                                                                                       |

|    |      |                        |                                                                                                                   |
|----|------|------------------------|-------------------------------------------------------------------------------------------------------------------|
| 1  |      |                        |                                                                                                                   |
| 2  |      |                        |                                                                                                                   |
| 3  |      |                        |                                                                                                                   |
| 4  |      | Event of undetermined  |                                                                                                                   |
| 5  | Y15  | intent                 | Poisoning by and exposure to alcohol, undetermined intent                                                         |
| 6  |      |                        |                                                                                                                   |
| 7  |      |                        |                                                                                                                   |
| 8  |      | Event of undetermined  |                                                                                                                   |
| 9  | Y16  | intent                 | Poisoning by and exposure to organic solvents and halogenated hydrocarbons and their vapours, undetermined intent |
| 10 |      |                        |                                                                                                                   |
| 11 |      | Event of undetermined  |                                                                                                                   |
| 12 | Y17  | intent                 | Poisoning by and exposure to other gases and vapours, undetermined intent                                         |
| 13 |      |                        |                                                                                                                   |
| 14 |      |                        |                                                                                                                   |
| 15 |      | Event of undetermined  |                                                                                                                   |
| 16 | Y18  | intent                 | Poisoning by and exposure to pesticides, undetermined intent                                                      |
| 17 |      |                        |                                                                                                                   |
| 18 |      | Event of undetermined  |                                                                                                                   |
| 19 | Y19  | intent                 | Poisoning by and exposure to other and unspecified chemicals and noxious substances, undetermined intent          |
| 20 |      |                        |                                                                                                                   |
| 21 |      |                        |                                                                                                                   |
| 22 |      | Legal intervention and |                                                                                                                   |
| 23 | Y352 | operations of war      | Legal intervention involving gas                                                                                  |
| 24 |      |                        |                                                                                                                   |
| 25 |      | Legal intervention and |                                                                                                                   |
| 26 | Y355 | operations of war      | Legal execution                                                                                                   |
| 27 |      |                        |                                                                                                                   |
| 28 |      |                        |                                                                                                                   |
| 29 |      |                        |                                                                                                                   |
| 30 |      |                        |                                                                                                                   |
| 31 |      |                        |                                                                                                                   |
| 32 |      |                        |                                                                                                                   |
| 33 |      |                        |                                                                                                                   |
| 34 |      |                        |                                                                                                                   |
| 35 |      |                        |                                                                                                                   |
| 36 |      |                        |                                                                                                                   |
| 37 |      |                        |                                                                                                                   |
| 38 |      |                        |                                                                                                                   |
| 39 |      |                        |                                                                                                                   |
| 40 |      |                        |                                                                                                                   |
| 41 |      |                        |                                                                                                                   |
| 42 |      |                        |                                                                                                                   |
| 43 |      |                        |                                                                                                                   |
| 44 |      |                        |                                                                                                                   |
| 45 |      |                        |                                                                                                                   |
| 46 |      |                        |                                                                                                                   |
| 47 |      |                        |                                                                                                                   |



**STROBE 2007 (v4) Statement—Checklist of items that should be included in reports of *cohort studies***

| Section/Topic                | Item # | Recommendation                                                                                                                                                                       | Reported on page # |
|------------------------------|--------|--------------------------------------------------------------------------------------------------------------------------------------------------------------------------------------|--------------------|
| <b>Title and abstract</b>    | 1      | (a) Indicate the study's design with a commonly used term in the title or the abstract                                                                                               | 1                  |
|                              |        | (b) Provide in the abstract an informative and balanced summary of what was done and what was found                                                                                  | 3                  |
| <b>Introduction</b>          |        |                                                                                                                                                                                      |                    |
| Background/rationale         | 2      | Explain the scientific background and rationale for the investigation being reported                                                                                                 | 5                  |
| Objectives                   | 3      | State specific objectives, including any prespecified hypotheses                                                                                                                     | 6                  |
| <b>Methods</b>               |        |                                                                                                                                                                                      |                    |
| Study design                 | 4      | Present key elements of study design early in the paper                                                                                                                              | 6                  |
| Setting                      | 5      | Describe the setting, locations, and relevant dates, including periods of recruitment, exposure, follow-up, and data collection                                                      | 6                  |
| Participants                 | 6      | (a) Give the eligibility criteria, and the sources and methods of selection of participants. Describe methods of follow-up                                                           | 8                  |
|                              |        | (b) For matched studies, give matching criteria and number of exposed and unexposed                                                                                                  | -                  |
| Variables                    | 7      | Clearly define all outcomes, exposures, predictors, potential confounders, and effect modifiers. Give diagnostic criteria, if applicable                                             | 9 - 10             |
| Data sources/<br>measurement | 8*     | For each variable of interest, give sources of data and details of methods of assessment (measurement). Describe comparability of assessment methods if there is more than one group | 8                  |
| Bias                         | 9      | Describe any efforts to address potential sources of bias                                                                                                                            | -                  |
| Study size                   | 10     | Explain how the study size was arrived at                                                                                                                                            | -                  |
| Quantitative variables       | 11     | Explain how quantitative variables were handled in the analyses. If applicable, describe which groupings were chosen and why                                                         | 12-13              |
| Statistical methods          | 12     | (a) Describe all statistical methods, including those used to control for confounding                                                                                                | 12-13              |
|                              |        | (b) Describe any methods used to examine subgroups and interactions                                                                                                                  | -                  |
|                              |        | (c) Explain how missing data were addressed                                                                                                                                          | 12                 |
|                              |        | (d) If applicable, explain how loss to follow-up was addressed                                                                                                                       | -                  |
|                              |        | (e) Describe any sensitivity analyses                                                                                                                                                | -                  |
| <b>Results</b>               |        |                                                                                                                                                                                      |                    |

|                          |     |                                                                                                                                                                                                              |          |
|--------------------------|-----|--------------------------------------------------------------------------------------------------------------------------------------------------------------------------------------------------------------|----------|
| Participants             | 13* | (a) Report numbers of individuals at each stage of study—eg numbers potentially eligible, examined for eligibility, confirmed eligible, included in the study, completing follow-up, and analysed            | 13       |
|                          |     | (b) Give reasons for non-participation at each stage                                                                                                                                                         | -        |
|                          |     | (c) Consider use of a flow diagram                                                                                                                                                                           | Figure 1 |
| Descriptive data         | 14* | (a) Give characteristics of study participants (eg demographic, clinical, social) and information on exposures and potential confounders                                                                     | 13       |
|                          |     | (b) Indicate number of participants with missing data for each variable of interest                                                                                                                          | -        |
|                          |     | (c) Summarise follow-up time (eg, average and total amount)                                                                                                                                                  | -        |
| Outcome data             | 15* | Report numbers of outcome events or summary measures over time                                                                                                                                               | 15 -16   |
| Main results             | 16  | (a) Give unadjusted estimates and, if applicable, confounder-adjusted estimates and their precision (eg, 95% confidence interval). Make clear which confounders were adjusted for and why they were included | -        |
|                          |     | (b) Report category boundaries when continuous variables were categorized                                                                                                                                    | -        |
|                          |     | (c) If relevant, consider translating estimates of relative risk into absolute risk for a meaningful time period                                                                                             | -        |
| Other analyses           | 17  | Report other analyses done—eg analyses of subgroups and interactions, and sensitivity analyses                                                                                                               | 16-17    |
| <b>Discussion</b>        |     |                                                                                                                                                                                                              |          |
| Key results              | 18  | Summarise key results with reference to study objectives                                                                                                                                                     | 17-20    |
| <b>Limitations</b>       |     |                                                                                                                                                                                                              |          |
| Interpretation           | 20  | Give a cautious overall interpretation of results considering objectives, limitations, multiplicity of analyses, results from similar studies, and other relevant evidence                                   | 20       |
| Generalisability         | 21  | Discuss the generalisability (external validity) of the study results                                                                                                                                        | 20       |
| <b>Other information</b> |     |                                                                                                                                                                                                              |          |
| Funding                  | 22  | Give the source of funding and the role of the funders for the present study and, if applicable, for the original study on which the present article is based                                                | 22       |

\*Give information separately for cases and controls in case-control studies and, if applicable, for exposed and unexposed groups in cohort and cross-sectional studies.

**Note:** An Explanation and Elaboration article discusses each checklist item and gives methodological background and published examples of transparent reporting. The STROBE checklist is best used in conjunction with this article (freely available on the Web sites of PLoS Medicine at <http://www.plosmedicine.org/>, Annals of Internal Medicine at <http://www.annals.org/>, and Epidemiology at <http://www.epidem.com/>). Information on the STROBE Initiative is available at [www.strobe-statement.org](http://www.strobe-statement.org).

# BMJ Open

## Profile and Triage Appropriateness of Trauma Patients Triage Green: A Prospective Cohort Study from a Secondary Care Hospital in India

|                                 |                                                                                                                                                                                                                                                                                                                                                                                                                                                                                                                                                                                                                                                                                                                                                                                                                                                                                                                                                                                                                                                                                                                                                                                                                                                                                                                                                                                                                                                                                                                                                    |
|---------------------------------|----------------------------------------------------------------------------------------------------------------------------------------------------------------------------------------------------------------------------------------------------------------------------------------------------------------------------------------------------------------------------------------------------------------------------------------------------------------------------------------------------------------------------------------------------------------------------------------------------------------------------------------------------------------------------------------------------------------------------------------------------------------------------------------------------------------------------------------------------------------------------------------------------------------------------------------------------------------------------------------------------------------------------------------------------------------------------------------------------------------------------------------------------------------------------------------------------------------------------------------------------------------------------------------------------------------------------------------------------------------------------------------------------------------------------------------------------------------------------------------------------------------------------------------------------|
| Journal:                        | <i>BMJ Open</i>                                                                                                                                                                                                                                                                                                                                                                                                                                                                                                                                                                                                                                                                                                                                                                                                                                                                                                                                                                                                                                                                                                                                                                                                                                                                                                                                                                                                                                                                                                                                    |
| Manuscript ID                   | bmjopen-2022-065036.R1                                                                                                                                                                                                                                                                                                                                                                                                                                                                                                                                                                                                                                                                                                                                                                                                                                                                                                                                                                                                                                                                                                                                                                                                                                                                                                                                                                                                                                                                                                                             |
| Article Type:                   | Original research                                                                                                                                                                                                                                                                                                                                                                                                                                                                                                                                                                                                                                                                                                                                                                                                                                                                                                                                                                                                                                                                                                                                                                                                                                                                                                                                                                                                                                                                                                                                  |
| Date Submitted by the Author:   | 10-Oct-2022                                                                                                                                                                                                                                                                                                                                                                                                                                                                                                                                                                                                                                                                                                                                                                                                                                                                                                                                                                                                                                                                                                                                                                                                                                                                                                                                                                                                                                                                                                                                        |
| Complete List of Authors:       | Anthony, Aroke; Doctors For You<br>Dutta, Rohini; - World Health Organization Collaborating Center for Research in Surgical Care Delivery in Low-and-Middle Income Countries; - Christian Medical College and Hospital, Sarang, Bhakti; World Health Organization Collaborating Centre on Research in Surgical Care Delivery in Low-Middle-Income Countries; Terna Medical College & Hospital, Department of Surgery<br>David, Siddarth; Karolinska Institutet, Department of Global Public Health<br>O'Reilly, Gerard; Monash University, Emergency medicine<br>Raykar, Nakul; Harvard Medical School, Department of Global Health and Social Medicine; Brigham and Women's Hospital, Emergency Surgery<br>Khajanchi, Monty; Seth Gowardhandas Sunderdas Medical College and King Edward Memorial Hospital, Department of Surgery<br>Attergrim, Jonatan; Karolinska Institutet<br>Soni, Kapil; All India Institute of Medical Sciences, Critical Care<br>Sharma, Naveen; All India Institute of Medical Sciences, Surgery<br>Mohan, Monali; WHO Collaboration Centre for Research in Surgical Care Delivery in LMICs, Mumbai, India,<br>Gadgil, Anita; World Health Organization Collaborating Center for Research in Surgical Care Delivery in Low-and-Middle Income Countries<br>Roy, Nobhojit; World Health Organization Collaborating Center for Research in Surgical Care Delivery in Low-and-Middle Income Countries<br>Gerdin Wärnberg, Martin ; Karolinska Institutet, Department of Global Public Health; Karolinska University Hospital |
| <b>Primary Subject Heading</b>: | Emergency medicine                                                                                                                                                                                                                                                                                                                                                                                                                                                                                                                                                                                                                                                                                                                                                                                                                                                                                                                                                                                                                                                                                                                                                                                                                                                                                                                                                                                                                                                                                                                                 |
| Secondary Subject Heading:      | Emergency medicine, Public health                                                                                                                                                                                                                                                                                                                                                                                                                                                                                                                                                                                                                                                                                                                                                                                                                                                                                                                                                                                                                                                                                                                                                                                                                                                                                                                                                                                                                                                                                                                  |
| Keywords:                       | TRAUMA MANAGEMENT, ACCIDENT & EMERGENCY MEDICINE, Trauma management < ORTHOPAEDIC & TRAUMA SURGERY                                                                                                                                                                                                                                                                                                                                                                                                                                                                                                                                                                                                                                                                                                                                                                                                                                                                                                                                                                                                                                                                                                                                                                                                                                                                                                                                                                                                                                                 |
|                                 |                                                                                                                                                                                                                                                                                                                                                                                                                                                                                                                                                                                                                                                                                                                                                                                                                                                                                                                                                                                                                                                                                                                                                                                                                                                                                                                                                                                                                                                                                                                                                    |

1  
2  
3  
4  
5  
6  
7  
8  
9  
10  
11  
12  
13  
14  
15  
16  
17  
18  
19  
20  
21  
22  
23  
24  
25  
26  
27  
28  
29  
30  
31  
32  
33  
34  
35  
36  
37  
38  
39  
40  
41  
42  
43  
44  
45  
46  
47  
48  
49  
50  
51  
52  
53  
54  
55  
56  
57  
58  
59  
60

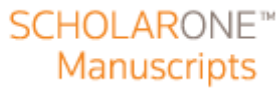



I, the Submitting Author has the right to grant and does grant on behalf of all authors of the Work (as defined in the below author licence), an exclusive licence and/or a non-exclusive licence for contributions from authors who are: i) UK Crown employees; ii) where BMJ has agreed a CC-BY licence shall apply, and/or iii) in accordance with the terms applicable for US Federal Government officers or employees acting as part of their official duties; on a worldwide, perpetual, irrevocable, royalty-free basis to BMJ Publishing Group Ltd ("BMJ") its licensees and where the relevant Journal is co-owned by BMJ to the co-owners of the Journal, to publish the Work in this journal and any other BMJ products and to exploit all rights, as set out in our [licence](#).

The Submitting Author accepts and understands that any supply made under these terms is made by BMJ to the Submitting Author unless you are acting as an employee on behalf of your employer or a postgraduate student of an affiliated institution which is paying any applicable article publishing charge ("APC") for Open Access articles. Where the Submitting Author wishes to make the Work available on an Open Access basis (and intends to pay the relevant APC), the terms of reuse of such Open Access shall be governed by a Creative Commons licence – details of these licences and which [Creative Commons](#) licence will apply to this Work are set out in our licence referred to above.

Other than as permitted in any relevant BMJ Author's Self Archiving Policies, I confirm this Work has not been accepted for publication elsewhere, is not being considered for publication elsewhere and does not duplicate material already published. I confirm all authors consent to publication of this Work and authorise the granting of this licence.

1  
2  
3 **1 Profile and Triage Appropriateness of Trauma Patients Triage Green: A Prospective Cohort Study**  
4 **2 from a Secondary Care Hospital in India**  
5  
6 3

7 4 Aroke Anna Anthony,<sup>1,2</sup> Rohini Dutta,<sup>2,3</sup> Bhakti Sarang,<sup>2,4</sup> Siddarth David,<sup>5</sup> Gerard O'Reilly,<sup>6,7,8</sup> Nakul  
8 5 Raykar,<sup>9,10,11</sup> Monty Khajanchi,<sup>2,12</sup> Jonatan Attergrim,<sup>13</sup> Kapil Dev Soni,<sup>14</sup> Naveen Sharma,<sup>15</sup> Monali  
9 6 Mohan,<sup>2</sup> Anita Gadgil,<sup>2</sup> Nobhojit Roy,<sup>2,5,7</sup> Martin Gerdin Wörnberg<sup>5,13</sup>  
10  
11 7

12 8 <sup>1</sup> Doctors For You, Mumbai, India

13 9 <sup>2</sup> Trauma Research Group, World Health Organization Collaborating Centre on Research in Surgical Care  
14 10 Delivery in Low-Middle-Income Countries, Mumbai, India

15 11 <sup>3</sup> MBBS, Christian Medical College and Hospital, Ludhiana, India

16 12 <sup>4</sup> Department of Surgery, Terna Medical College & Hospital, New Mumbai, India

17 13 <sup>5</sup> Department of Global Public Health, Karolinska Institutet, Stockholm, Sweden

18 14 <sup>6</sup> Epidemiology & Biostatistics, National Trauma Research Institute, The Alfred, Melbourne, Australia

19 15 <sup>7</sup> School of Public Health & Preventive Medicine, Monash University, Melbourne, Australia

20 16 <sup>8</sup> Global programs, Emergency & Trauma Centre, The Alfred, Melbourne, Australia

21 17 <sup>9</sup> Program in Global Surgery and Social Change, Harvard Medical School, Boston, USA

22 18 <sup>10</sup> Trauma, Emergency Surgery & Surgical Critical Care, Brigham and Women's Hospital, Boston, MA,  
23 19 USA

24 20 <sup>11</sup> Center for Surgery and Public Health, Brigham and Women's Hospital, Boston, MA, USA

25 21 <sup>12</sup> Department of Surgery, Seth.G.S. Medical College & K.E.M. Hospital, Parel, Mumbai, India

26 22 <sup>13</sup> Function Perioperative Medicine and Intensive Care, Karolinska University Hospital, Solna, Sweden

27 23 <sup>14</sup> Critical & Intensive Care, JPN Apex Trauma Centre, AIIMS, New Delhi, India

28 24 <sup>15</sup> Department of Surgery, All India Institute of Medical Sciences, Jodhpur, India  
29  
30

31 26 **Corresponding Author:** Martin Gerdin Wörnberg  
32  
33

34 28 Department of Global Public Health, Karolinska Institutet, Stockholm, Sweden; Function Perioperative  
35 29 Medicine and Intensive Care, Karolinska University Hospital, Solna, Sweden.  
36  
37

38 31 Address: Department of Global Public Health

39 32 Karolinska Institutet

40 33 171 77 Stockholm

41 34 Email: martin.gerdin@ki.se

42 35 Phone Number: +46 708539598  
43  
44

45 37 **Short title:** Profile and Triage Appropriateness of Trauma Patients Triage Green in a Secondary Care  
46 38 Hospital in India  
47  
48

49 40 **Word Count (Abstract):** 262 words  
50  
51  
52  
53  
54  
55  
56  
57  
58  
59  
60

1  
2  
3  
4  
5  
6  
7  
8  
9  
10  
11  
12  
13  
14  
15  
16  
17  
18  
19  
20  
21  
22  
23  
24  
25  
26  
27  
28  
29  
30  
31  
32  
33  
34  
35  
36  
37  
38  
39  
40  
41  
42  
43  
44  
45  
46  
47  
48  
49  
50  
51  
52  
53  
54  
55  
56  
57  
58  
59  
60

1  
2  
3  
4  
5  
6  
7  
8  
9  
10  
11  
12  
13  
14  
15  
16  
17  
18  
19  
20  
21  
22  
23  
24  
25  
26  
27  
28  
29  
30  
31  
32  
33  
34  
35  
36  
37  
38  
39  
40  
41  
42  
43  
44  
45  
46  
47  
48  
49  
50  
51  
52  
53  
54  
55

**Word Count (Manuscript):** 3086 words

For peer review only

## 1 ABSTRACT

2 **Objective:** To evaluate the profile of non-urgent patients triaged 'green', as part of a triage-trial in the  
3 Emergency Department (ED) of a secondary-care hospital in India. The secondary aim was to validate our  
4 findings with the Cape Triage Score (CTS).

5 **Design:** Prospective cohort study

6 **Setting:** A secondary care-hospital in Mumbai, India.

7 **Participants:** Patients aged 18 years and above with a history of trauma defined as having any of the  
8 external causes of morbidity and mortality listed in block V01-Y36, chapter XX of the International  
9 Classification of Disease version 10 (ICD-10) codebook, triaged green between July 2016 to November  
10 2019.

11 **Outcome:** Outcome measures were mortality within 24-hours, 30-days and mistriage.

12 **Results:** We included 4135 trauma patients triaged green. The mean age of patients was 32.8 ( $\pm$ 13.1) years,  
13 and 77% were males. The median (IQR) length of stay of admitted patients was 3 (13) days. Half the  
14 patients had a mild Injury Severity Score (3-8), with the majority of injuries being blunt (98%). Of the  
15 patients triaged green by clinicians, three-quarters (74%) were undertriaged on cross validating with CTS.  
16 On telephonic follow-up two patients were reported dead whereas one died while admitted in-hospital.

17 **Conclusion:** Our study highlights the need for implementation and evaluation of training in trauma triage  
18 systems that use physiological parameters including pulse, systolic blood pressure and glasgow coma scale,  
19 for the in-hospital first responders (clinicians, nurses and other paramedical staff) in the EDs.

20 **Ethical clearance:** Ethics committee approval for Trauma Triage Study in India (TTRIS) was obtained  
21 from the ethics and scientific committee of Khurshedji Behramji Bhabha Hospital (KBBH) (KBBH,  
22 HO/4982/KBB,12/08/2016).

23

24

25



1  
2  
3 1 Strengths and limitations of this study:  
4

- 5 2 • This is a prospective cohort study, with vital signs recorded by a dedicated research officer,  
6  
7 3 documenting the profile of green triaged patients from a public secondary care hospital in an urban  
8  
9 4 LMIC setting conducted over a period of 3 years.  
10  
11  
12 5 • Triage appropriateness was assessed using a standardised and validated triage scoring system  
13  
14 6 (CTS), that included both physiological parameters and injury characteristics of the patients.  
15  
16 7 • The study provides data from a single secondary care hospital in Mumbai. Therefore, the results  
17  
18 8 cannot be generalised to other Indian hospitals due to hospital bias.  
19  
20 9 • Data of only the first 10 consecutive patients were collected each shift during the study period.  
21  
22 10 • We lack data documenting 30-day mortality of all the patients and morbidity.  
23  
24  
25  
26  
27  
28  
29  
30  
31  
32  
33  
34  
35  
36  
37  
38  
39  
40  
41  
42  
43  
44  
45  
46  
47  
48  
49  
50  
51  
52  
53  
54  
55  
56  
57  
58  
59  
60

## 1 INTRODUCTION

2 Globally, each year, 4.5 million people die from trauma, with India contributing to 20% of this burden. [1]  
3 Trauma represents the second most common cause of death after age five in India.[2] Furthermore, India  
4 also has the highest rank in the number of deaths attributable to road traffic-related deaths in the world.[3]  
5 Approximately 50% of trauma deaths occur in the hospitals, highlighting the need for strengthening in-  
6 hospital care.[4] Trauma care is highly time-sensitive, and the early identification of injuries is important  
7 for survival.[5] Establishment of hospital triage systems can ensure that critically ill patients are identified  
8 and receive care promptly.[6] For this purpose, several triage scores are used across different countries and  
9 hospital settings.[7,8]

10 In India, the high population density, poorly developed prehospital care and a lack of appropriate referral  
11 systems leads to overcrowding in the emergency departments (EDs).[9–12] Most EDs lack triage protocols  
12 and the level of emergency patient care is decided by clinicians who are not trained specifically in trauma  
13 care.[13,14] Lack of adequate triage contributes to a surge in non-urgent patients presenting directly to the  
14 ED, exacerbating the problem of overcrowding.[14–17] This leads to diversion of workforce and resources  
15 from serious patients requiring immediate care. Nonetheless, not evaluating these patients could result in  
16 missed injuries and poor outcomes.

17 In our study, clinicians at a triage-naive ED were introduced to a triage-trial, as part of a multicentre triage  
18 project which compared prediction models for triage in adult trauma patients presenting to various  
19 emergency departments across India.[15] The patients were designated one of the four trauma triage  
20 categories by clinicians, based on their understanding of trauma triage; into red, orange, yellow, green, with  
21 red and green denoting the most and least urgent patient status respectively. We aimed to evaluate the  
22 profile of the non-urgent patients who were triaged green by clinicians and the validity of this category in  
23 comparison to the Cape Triage Score (CTS). CTS is a mixed score based on physiological parameters and  
24 the pathology of the patient and has been effectively used at various settings in South Africa and Low- and

1 Middle-Income Countries (LMIC) since 2006.[18] It is a comprehensive triage score with a low undertriage  
2 rate capable of predicting patient disposition.[19]

3

## 4 **METHODOLOGY**

### 5 *Study Design*

6 This single-centre prospective cohort study is part of the Trauma Triage Study in India (TTRIS) which  
7 compares prediction models for triage in adult trauma patients presenting to various emergency departments  
8 across India. Data was collected in the study site from July 2016 to November 2019.

### 9 *Study Setting*

10 The study site was the ED of Khurshedji Behramji Bhabha Hospital (KBBH), a 436 bedded regional  
11 secondary healthcare centre located in Mumbai, India, catering to approximately 350 patients each day in  
12 the ED. It is a secondary-care public hospital with free or nominal fees, providing access to low socio-  
13 economic groups and receives patients from across the city. At KBBH, trauma care is imparted as a  
14 subspeciality along with medical, surgical, and obstetric care. The hospital has an intensive care facility but  
15 there is no neurosurgery department, so patients in need of neurosurgical management are referred to  
16 tertiary care centres. Plain radiography and ultrasonography are available round the clock; however  
17 computerised tomography (CT) is only available in-house from 7am to 6pm. The patients arriving at the  
18 ED are first seen by a casualty medical officer (CMO) largely on a first-come, first-served basis without a  
19 formalised system of triaging patients at the ED.

### 20 *Clinician Triage*

21 As part of data collection of TTRIS, the triage-naive clinicians were informed about the trauma triage  
22 categories, without provision to any formal tool or training about the same. The clinicians involved have a  
23 minimum of 2 years clinical experience, however, they are neither trained in trauma care as a speciality  
24 nor are they necessarily trained in trauma management courses like Advanced Trauma Life Support  
25 (ATLS). Medical training of the clinicians includes aspects such as triage systems in theory however not

1 put in practise due to lack of formal triage protocols. After their initial on-arrival assessment of each  
2 patient, the research officers asked the clinicians to categorise the urgency of patients into the  
3 aforementioned colour-coded triage groups,[15] henceforth referred to as the triage levels. The triage  
4 level denoted by clinicians was just based on their experiential and intuitive clinical knowledge. For doing  
5 this, the clinicians were allowed to use all available information that was extracted by them during initial  
6 routine assessment. The triage levels were not used to determine treatment decisions in the ED as there  
7 was no formalised tool or protocol in place for assigning the triage and coupling it with patient  
8 management. No formal training in triage was given except for standard comparable labels to different  
9 triage colour categories, in order to allow them to continue with their routine intuitive clinical assessment.  
10 The clinicians were individually informed about the aim and methodology used for the TTRIS study at  
11 the start of their respective posting at the ED, however, the clinicians were neither involved in the  
12 conception nor were they part of the research team analysing the results.

### 13 ***Participants***

14 *Inclusion Criteria:* We included all the patients aged 18 years and above presenting to the KBBH ED with  
15 a history of trauma as their primary complaint and triaged green by clinical triage on initial evaluation  
16 irrespective of their injury severity. A history of trauma was defined here as having any of the external  
17 causes of morbidity and mortality listed in block V01-Y36, chapter XX of the International Classification  
18 of Disease version 10 (ICD-10) online codebook, with some exclusions (see online supplementary  
19 material).[20]

20 *Exclusion Criteria:* Patients with missing data in one or more variables used for analysis or who did not  
21 consent to follow-up were excluded from the analysis.

### 22 ***Source and methods of selection of participants and follow-up***

23 The research officer at KBBH observed morning, evening and night shifts (6-hour observational shifts).  
24 These shifts were not aligned with the working hours of the clinical staff to reduce bias and accounting for  
25 shift fatigue of the clinicians. Data were collected from the first 10 consecutive patients only, irrespective

1 of their triage, during each shift. The research officer collected the vital signs but was in no way involved  
2 in patient assessment or management. Due to the large patient load and time and budgetary constraints of  
3 the project, data collection of only the first 10 patients was considered feasible for follow-up.

4 The research officer performed follow-up at 24-hours, 30-days after arrival at the ED. The follow-up was  
5 completed in-person or by telephone, depending on whether the patient was still hospitalised or if the patient  
6 had been discharged. The phone numbers of one or more contact persons, mostly relatives, were collected  
7 on enrolment and those people were contacted if the participant did not reply to the follow-up telephone  
8 calls. The outcome was recorded as missing if neither the patient nor the relative were available for follow-  
9 up at the specified time-points.

## 10 *Variables*

11 To evaluate the profile of patients triaged green we analysed the 24 hours and 30 days mortality. To  
12 determine the triage appropriateness, we retrospectively used CTS. Additionally, for each participant, age,  
13 sex, mechanism of injury, injury-related details, assigned informal triage category, and intensive care unit  
14 (ICU) or ward admission status were collected. Physiological measures including systolic blood pressure  
15 (SBP), respiratory rate (RR), heart rate (HR), peripheral capillary oxygen saturation (SpO<sub>2</sub>), Glasgow Coma  
16 Scale (GCS) and Alert Verbal Pain unresponsive scale (AVPU) were recorded.

17 GCS was categorised into no or mild traumatic brain injury (TBI) (13-15), moderate TBI (9-12), severe  
18 TBI (3-8).[21] Length of stay in the hospital (LoS) was calculated using the data and time of admission in  
19 the hospital to the data and time of discharge alive from the hospital, mortality, leave against medical advice  
20 (LAMA) or abscond. Injury severity score (ISS) was allocated retrospectively with 'mild' (3-8), 'moderate'  
21 (9-15), 'severe' (16-25) and 'profound' (>25) categories. Patients for whom ISS could not be coded, for  
22 example when there were no recorded injuries, were assigned 'no defined ISS'. [22] The revised trauma  
23 score (RTS) was computed and categorised as RTS < 4 and RTS > 4.[22,23]

24 Injuries were recorded and coded using ICD-10 in the TTRIS dataset. Patients were divided into categories  
25 with respect to the most critical injury namely, crush injury, injury to internal organs, blood vessel injury,

1  
2  
3 1 amputation, fracture, dislocation, burn, multiple injury, unspecified injury, open wound, superficial  
4  
5 2 injury.[20] Injury characteristics of patients that presented to the ED with no injuries were categorized as  
6  
7 3 'no defined injury'. For patients with multiple injuries, the more critical one was considered for categorising  
8  
9 4 patients as per injury. Time of arrival of patients was categorised into four groups, namely, morning (6am-  
10  
11 5 11:59am), afternoon (12pm – 5:59pm), evening (6pm – 11:59pm), and night (12am – 5:59 am).[24] The  
12  
13 6 adult CTS was used retrospectively to check for the appropriateness of the informal triage performed by  
14  
15 7 the clinicians.[18] The patients triaged green as per the clinician triage were further classified using the  
16  
17 8 Triage Early Warning Score (TEWS) and South African Triage Score (SATS) colour code into red, orange,  
18  
19 9 yellow and green.

### 10 ***Quality assurance***

11 There were three layers of quality control. First, data was entered using a dedicated electronic data  
12  
13 12 collection instrument with extensive logical checks and prompts for unlikely but possible values. Second,  
14  
15 13 the collected data were reviewed on a weekly basis and discussed during weekly online conferences with  
16  
17 14 all research officers and the project leads throughout the duration of the data collection period. Third, on-  
18  
19 15 site quality control sessions were conducted every 3-4 months. During these sessions, a second research  
20  
21 16 officer collected data alongside the research officer who worked at the ED. The quality-controlled data was  
22  
23 17 then compared with the standard data.

### 18 ***Patient and Public Involvement***

19 No patients were involved.

### 20 ***Data Analysis***

21 Data analysis was performed using R version 4.04 statistical software.[25] Complete case analysis was  
22  
23 22 performed to include patients with complete data. We describe the sample using frequencies and  
24  
25 23 percentages for categorical variables, and mean and standard deviation (SD) for normally distributed  
26  
27 24 continuous variables and median and inter quartile range (IQR) for non-normally distributed continuous  
28  
29 25 variables. The number of patients triaged green by the CTS was divided by the number of patients triaged

1 green as per clinician triage (4135), the resultant proportion minus one was considered as the proportion of  
2 patients mis-triaged.

3

## 4 **RESULTS**

5 In the study, 4151 patients were included of which 4135 (99.6%) patients were triaged green by the  
6 clinicians (**Figure 1**).

### 7 *Profile of patients triaged green*

8 The mean age of patients was 32.8±13.1 years with 3172 (77%) males. Notably, of all patients triaged  
9 green, 10/4135 (0.24%) patients presented with moderate to severe GCS and 0.3% of patients did not have  
10 an AVPU of alert. Majority of patients (97%) triaged green presented to the study-site directly without a  
11 primary care hospital referral.

12 Of the total patients triaged green by clinicians, 46% of patients had only superficial injuries of which  
13 majority (30.8%) were due to animal bites. Further, 24% had no external injuries on examination. Among  
14 those referred to other centers, the most common types of injury identified were superficial injuries (34)  
15 followed by open wounds (27) and patients with no documented injury (19). The reasons for referral to  
16 other centres were not documented. As per ISS, 50.2% of patients had 'mild' and 0.4% had 'moderate'  
17 score and the remaining 49.5% patients had 'no defined ISS'. **Figure 2** shows the different injury types as  
18 per mechanism of injury in the study population. Amongst those that had a transport accident, 881/916  
19 (96.17%) were patients who had a road traffic injury.

20 The ED disposition of all the patients is shown in **Figure 1**. The median (IQR) length of stay (LoS) of those  
21 admitted to the hospital was 3 (13) days and seven patients required admission in the ICU. Most admitted  
22 patients 62/74 (83.8%) were successfully discharged from the hospital while three were transferred to other  
23 centers for further management. Further, there were eight patients that left against medical advice and one  
24 who died during their hospital stay.

1 Follow up at 30 days was successful for 3832/4135 (92.7%) of patients. Three patients died during the first  
 2 30 days. Of these patients, two had a GCS of <8 on initial evaluation. The CTS triage of these patients were  
 3 yellow and orange as per the CTS.

#### 4 ***Evaluation of triage appropriateness through retrospective CTS***

5 We found that of the total number of patients that were triaged green by clinicians (N=4135), 24 patients  
 6 were triaged red, 448 patients were triaged orange and 2579 patients were triaged yellow as per CTS  
 7 indicating that 73.8% patients were mistriaged by the ED clinicians. Proportions of mistriage were higher  
 8 during the night and afternoon (**Table 1A**). Of these, most patients (97%) were found to have been  
 9 mistriaged after assessing their physiological parameters from TEWS while others due to the SATS color  
 10 code for discriminators as seen in **Table 1B**. In **Figure 3** the disposition of these patients from the ED as  
 11 per their CTS is depicted. Notably, of the total three documented deaths, one occurred in a patient who was  
 12 admitted in the hospital and triaged orange as per CTS, and one in a patient transferred to a different centre  
 13 triaged yellow as per CTS. **Table 1C** shows that, CTS was successfully able to triage patients with fractures,  
 14 dislocation and amputations as urgent.

15 **Table 1 A: Patients mistriaged as per the time of the day (reference)**

| Mistriage    | Morning    | Afternoon   | Evening    | Night      | p      |
|--------------|------------|-------------|------------|------------|--------|
| n            | 756        | 1576        | 1155       | 648        |        |
| <b>True</b>  | 511 (67.6) | 1185 (75.2) | 858 (74.3) | 497 (76.7) | <0.001 |
| <b>False</b> | 245 (32.4) | 391 (24.8)  | 297 (25.7) | 151 (23.3) |        |

16  
 17 **Table 1 B: Patients mistriaged as per CTS (N=4135)**

| Cape Triage Score                 | Green | Yellow | Orange | Red |
|-----------------------------------|-------|--------|--------|-----|
| n                                 | 1084  | 2579   | 448    | 24  |
| <b>Triage Early Warning Score</b> | 1084  | 2513   | 433    | 19  |



|                                   |   |    |    |   |
|-----------------------------------|---|----|----|---|
| <b>South African Triage Scale</b> | 0 | 66 | 15 | 5 |
|-----------------------------------|---|----|----|---|

**Table 1 C: Injury characteristics as per the CTS Triage category**

|                    | <b>CTS Triage</b>        | <b>Green</b> | <b>Yellow</b> | <b>Orange</b> | <b>Red</b> | <b>p</b> |
|--------------------|--------------------------|--------------|---------------|---------------|------------|----------|
|                    | Amputation/ Crush Injury | 0 (0.0)      | 13 (0.5)      | 1 (0.2)       | 0 (0.0)    | <0.001   |
|                    | Fracture/Dislocation     | 0 (0.0)      | 243 (9.4)     | 41 (9.2)      | 1 (4.2)    |          |
| <b>Injury Type</b> | Others                   | 9 (0.8)      | 36 (1.4)      | 9 (2.0)       | 5 (20.8)   |          |
|                    | Open wound               | 204 (18.8)   | 575 (22.3)    | 123 (27.5)    | 8 (33.3)   |          |
|                    | Superficial Injury       | 635 (58.6)   | 1074 (41.6)   | 174 (38.8)    | 5 (20.8)   |          |
|                    | No defined Injury        | 236 (21.8)   | 638 (24.7)    | 100 (22.3)    | 5 (20.8)   |          |

## DISCUSSION

Blunt trauma was seen as the most common type of injury.[26] Transport accidents was the predominant mechanism of injury and 77% patients were males. Most patients had mild ISS (50.2%) and only about 0.4% patients had moderate ISS with no patients in the severe and profound ISS category. Most patients presented with seemingly superficial injuries. The presentation of 15.5% of patients with animal bites was unique to our setting. These patients mainly presented for vaccinations following animal bites more frequently than for the treatment of bite injuries.

Our study documented that approximately three quarters (74%) of patients informally triaged green were effectively mistriaged when compared to CTS. Out of 4135 patients triaged green by clinicians only 1084/4135 (26.2%) were triaged green according to the CTS. Most of these patients (97%) were coming in as direct arrival to this secondary-care hospital. CTS also rightly identified patients with fractures and dislocation as urgent thus avoiding the possibility of having missed injuries. These factors emphasise the need of on-scene triage and an effective referral system.

1  
2  
3 1 Our study found that 10/4135 (0.24%) patients that reported GCS moderate to severe and 0.3% of patients  
4  
5 2 did not have an AVPU of alert and were still triaged green. This indicates that among the green triaged  
6  
7 3 patients with close to normal physiological parameters, there were patients that required urgent attention.  
8  
9 4 Although the proportion of these patients is relatively low compared to our sample size, reasons for these  
10  
11 5 patients being inappropriately triaged must be explored extensively to enhance healthcare delivery in Indian  
12  
13 6 EDs. Additionally, these findings highlight the efficacy of physiological scores such as TEWS, a component  
14  
15 7 of CTS in triaging patients accurately and the need to include GCS assessment for all patients presenting  
16  
17 8 to the ED. Although the reasons for mistriaging are multifactorial, in this case, the lack of appropriate  
18  
19 9 training or standard, uniform protocol for patient management in the ED to quickly identify these patients  
20  
21 10 among those that have normal physiological parameters is most evident. The other factor, overcrowding of  
22  
23 11 the ED with limitation of resources, may also lead to inadequate trauma care.[27] This makes triaging  
24  
25 12 crucial which enables intensifying the efforts towards patients requiring immediate interventions and quick  
26  
27 13 management and disposition of the less urgent patients.

28  
29  
30  
31 14 In addition to the high proportion of mistriage ascertained by TEWS, of those admitted, seven required  
32  
33 15 admissions to the ICU indicating they may have required urgent management for their condition. On a  
34  
35 16 closer look at the triage category denoted by clinicians at the three patients found dead on 30-day follow-  
36  
37 17 up, it was seen that two of them were under triaged on initial evaluation of physiological parameters as they  
38  
39 18 had a GCS < 8. Including appropriate triage training for CMO's when implementing reforms in trauma  
40  
41 19 management is a key step towards improving outcomes in trauma patients. This requires prioritisation of  
42  
43 20 meticulous evaluation of the initial vital parameters by the ED staff to reduce errors and improve outcomes,  
44  
45 21 in addition to addressing other contributing factors such as the low clinician to patient ratio in Indian EDs.

46  
47  
48 22 This is a prospective cohort study, with vital signs recorded by a dedicated research officer, documenting  
49  
50 23 the profile of green triaged patients from a public secondary care hospital in an urban LMIC setting  
51  
52 24 conducted over a period of 3 years. Triage appropriateness was assessed using a standardised and validated  
53  
54 25 triage scoring system (CTS), that included both physiological parameters and injury characteristics of the  
55  
56  
57  
58  
59  
60

1 patients. This study has a few limitations. Firstly, the study provides data from a single secondary care  
2 centre, results of which may not be generalisable to other secondary care hospitals or other Indian healthcare  
3 settings. Secondly, to ensure feasibility, data of only 10 consecutive patients were collected in each shift.  
4 Lastly, we lack data documenting the 30-day mortality of all patients and have none on morbidity. This is  
5 a limiting factor towards assessing the morbidity gains.

## 6 **CONCLUSION**

7 Three-fourths (74%) of the patients triaged green by clinicians in a secondary care hospital in Mumbai were  
8 mistriaged when retrospectively analysed using CTS. This highlights the need for implementation and  
9 evaluation of trauma triage training, involving systems that rely on presenting physiological parameters,  
10 for clinicians, nurses and other paramedical staff in the EDs. Also, direct admissions of the non-urgent  
11 patients to this secondary-care hospital warrants strengthening the referral systems to avoid overcrowding  
12 of the Indian EDs the in-hospital first responders.

## 14 **LIST OF ABBREVIATIONS**

16 Emergency department (ED), Cape Triage Score (CTS), Low- and Middle-Income Country (LMIC),  
17 Trauma Triage Study in India (TTRIS), Khurshedji Behramji Bhabha Hospital (KBBH), Computerized  
18 Tomography (CT), Casualty Medical Officer (CMO), International Classification of Disease version 10  
19 (ICD-10), Injury Severity Score (ISS), systolic blood pressure (SBP), respiratory rate (RR), heart rate (HR),  
20 peripheral capillary oxygen saturation (SpO<sub>2</sub>), Glasgow Coma Scale (GCS), Alert Verbal Pain  
21 unresponsive scaled (AVPU), Traumatic Brain Injury (TBI), ED-length of stay (ED-LoS), Length of stay  
22 in the hospital (LoS), Leave against medical advice (LAMA), Revised Trauma Score (RTS), Triage Early  
23 Warning Score (TEWS), South African Triage Scale (SATS), Standard deviation (SD), Inter quartile range  
24 (IQR)

## 1       **2       DECLARATIONS**

### 3       **4       Ethical clearance**

5       6       Ethics committee approval for TTRIS was obtained from the ethics and scientific committee of KBBH  
7       8       (KBBH, HO/4982/KBB,12/08/2016). Informed consent for follow-up was taken from patients at the time  
9       10       of discharge from the hospital. In case the patient was unconscious, consent was obtained from a family  
11       12       member or the patient's legally acceptable representative.  
13

### 14       15       **16       Consent for publication**

17       18       19       20       21       22       23       24       25       26       27       28       29       30       31       32       33       34       35       36       37       38       39       40       41       42       43       44       45       46       47       48       49       50       51       52       53       54       55       56       57       58       59       60

8       9       10       11       12       13       14       15       16       17       18       19       20       21       22       23       24       25       26       27       28       29       30       31       32       33       34       35       36       37       38       39       40       41       42       43       44       45       46       47       48       49       50       51       52       53       54       55       56       57       58       59       60

Not Applicable

### 9       10       **11       Availability of data and materials**

12       13       14       15       16       17       18       19       20       21       22       23       24       25       26       27       28       29       30       31       32       33       34       35       36       37       38       39       40       41       42       43       44       45       46       47       48       49       50       51       52       53       54       55       56       57       58       59       60

10       11       12       13       14       15       16       17       18       19       20       21       22       23       24       25       26       27       28       29       30       31       32       33       34       35       36       37       38       39       40       41       42       43       44       45       46       47       48       49       50       51       52       53       54       55       56       57       58       59       60

The data are available to whoever wants them by emailing the corresponding author. They can write their  
11       12       aims and objectives, and then, the authors can decide if that study can be done without duplication of the  
13       14       work.  
15

### 13       14       **15       Competing Interests**

16       17       18       19       20       21       22       23       24       25       26       27       28       29       30       31       32       33       34       35       36       37       38       39       40       41       42       43       44       45       46       47       48       49       50       51       52       53       54       55       56       57       58       59       60

14       15       16       17       18       19       20       21       22       23       24       25       26       27       28       29       30       31       32       33       34       35       36       37       38       39       40       41       42       43       44       45       46       47       48       49       50       51       52       53       54       55       56       57       58       59       60

There is no conflict of interest to disclose from any of the authors

### 15       16       **17       Funding**

18       19       20       21       22       23       24       25       26       27       28       29       30       31       32       33       34       35       36       37       38       39       40       41       42       43       44       45       46       47       48       49       50       51       52       53       54       55       56       57       58       59       60

16       17       18       19       20       21       22       23       24       25       26       27       28       29       30       31       32       33       34       35       36       37       38       39       40       41       42       43       44       45       46       47       48       49       50       51       52       53       54       55       56       57       58       59       60

The data collection for TTRIS was funded by grants from the Swedish National Board of Health and  
17       18       Welfare, grant numbers 22464/2017 and 23745/2016.  
19

### 18       19       **20       Author Contribution**

21       22       23       24       25       26       27       28       29       30       31       32       33       34       35       36       37       38       39       40       41       42       43       44       45       46       47       48       49       50       51       52       53       54       55       56       57       58       59       60

19       20       21       22       23       24       25       26       27       28       29       30       31       32       33       34       35       36       37       38       39       40       41       42       43       44       45       46       47       48       49       50       51       52       53       54       55       56       57       58       59       60

Authors AA, RD, BS, SD and MGW have conceptualized the study. AA and RD analysed the data and AA,  
20       21       RD, BS were involved in the interpretation of the data and manuscript writing. GR, NR, MK, JA, KDS,  
22       23       NS, MM, AG, NR, and MGW contributed to the study design and critical revisions to the manuscript. All  
24       25       authors have contributed to drafting the article and revising it. They also approved the final version of the  
26       27       manuscript. All authors agree to be responsible for all aspects of the work.  
28

### 24       25       **26       Acknowledgments**

1 We thank the Thursday Truth Seekers (TTS) and the Trauma Triage Study in India (TTRIS), India, research  
2 team for their support.

### 3 REFERENCES

- 4 1. GBD 2017 Causes of Death Collaborators. Global, regional, and national age-sex-specific  
5 mortality for 282 causes of death in 195 countries and territories, 1980-2017: a systematic analysis  
6 for the Global Burden of Disease Study 2017. *Lancet* [Internet]. 2018 Nov 10 [cited 2021 Aug  
7 23];392(10159):1736–88. Available from: <https://pubmed.ncbi.nlm.nih.gov/30496103/>
- 8 2. World Health Organization. WHO country cooperation strategy at a glance : India. 2018.  
9 Available from: <https://apps.who.int/iris/handle/10665/136895>
- 10 3. Government of India. Ministry of Road Transport & Highways Transport Research Wing. Road  
11 Accidents in India 2019. 2019; Available from:  
12 [https://morth.nic.in/sites/default/files/RA\\_Uploadng.pdf](https://morth.nic.in/sites/default/files/RA_Uploadng.pdf)
- 13 4. G G. Injuries in India: A national perspective. *Burden of Disease in India Equitable Development -*  
14 *Healthy Future New Delhi: National Commission on Macroeconomics and Health, Ministry of*  
15 *Health & Family Welfare, Government of India. 2005;325–347. Available from:*  
16 [http://www.drbrambedkarcollege.ac.in/sites/default/files/Burden of disease in India.pdf#page=343](http://www.drbrambedkarcollege.ac.in/sites/default/files/Burden%20of%20disease%20in%20India.pdf#page=343)
- 17 5. Fitzgerald M, Cameron P, Mackenzie C, Farrow N, Scicluna P, Gocentas R, et al. Trauma  
18 resuscitation errors and computer-assisted decision support. *Arch Surg* [Internet]. 2011 Feb [cited  
19 2021 Aug 23];146(2):218–25. Available from: <https://pubmed.ncbi.nlm.nih.gov/21339436/>
- 20 6. Cameron P, Gabbe B, Smith K, Mitra B. Triageing the right patient to the right place in the shortest  
21 time. *Br J Anaesth* [Internet]. 2014 [cited 2021 Aug 23];113(2):226–33. Available from:  
22 <https://pubmed.ncbi.nlm.nih.gov/24961786/>
- 23 7. Twomey M, Wallis LA, Thompson M lou, Myers JE. The South African Triage Scale (adult  
24 version) provides reliable acuity ratings. *Int Emerg Nurs* [Internet]. 2012 Jul [cited 2021 Aug  
25 23];20(3):142–50. Available from: <https://pubmed.ncbi.nlm.nih.gov/22726946/>
- 26 8. Ebrahimi M, Heydari A, Mazlom R, Mirhaghi A. The reliability of the Australasian Triage Scale:  
27 a meta-analysis. *World J Emerg Med* [Internet]. 2015 [cited 2021 Aug 23];6(2):94. Available  
28 from: <https://pubmed.ncbi.nlm.nih.gov/26056538/>
- 29 9. Roy N, Murlidhar V, Chowdhury R, Patil SB, Supe PA, Vaishnav PD, et al. Where there are no  
30 emergency medical services-prehospital care for the injured in Mumbai, India. *Prehosp Disaster*  
31 *Med* [Internet]. 2010 [cited 2021 Aug 23];25(2):145–51. Available from:  
32 <https://pubmed.ncbi.nlm.nih.gov/20467994/>
- 33 10. Woolard RH, Borron SW MJM. Emergency Department Design. In: *Ciottone’s Disaster Medicine.*  
34 Elsevier. 2016;125–130.
- 35 11. Kumar S, Kumar S, Gupta B. Urban health: Needs urgent attention. *Indian J Public Health*  
36 [Internet]. 2018 Jul 1 [cited 2021 Aug 23];62(3):214–7. Available from:  
37 <https://pubmed.ncbi.nlm.nih.gov/30232971/>

12. Bashar MA, Bhattacharya S, Tripathi S, Sharma N, Singh A. Strengthening primary health care through e-referral system. *J Family Med Prim Care* [Internet]. 2019 [cited 2021 Aug 23];8(4):1511–3. Available from: <https://pubmed.ncbi.nlm.nih.gov/31143753/>
13. Gidwani S, Jena NN. Perspective article for *European Journal of Emergency Medicine: emergency medicine in India*. *Eur J Emerg Med* [Internet]. 2020 [cited 2021 Aug 23];27(5):317–8. Available from: <https://pubmed.ncbi.nlm.nih.gov/32852409/>
14. McHugh M, Tanabe P, McClelland M, Khare RK. More patients are triaged using the Emergency Severity Index than any other triage acuity system in the United States. *Acad Emerg Med* [Internet]. 2012 Jan [cited 2021 Aug 23];19(1):106–9. Available from: <https://pubmed.ncbi.nlm.nih.gov/22211429/>
15. Gerdin LW, Khajanchi M, Kumar V, Roy N, Saha ML, Soni KD, et al. Comparison of emergency department trauma triage performance of clinicians and clinical prediction models: a cohort study in India. *BMJ Open* [Internet]. 2020 Feb 18 [cited 2021 Aug 23];10(2). Available from: <https://pubmed.ncbi.nlm.nih.gov/32075827/>
16. Kumar A, Lakshminarayanan D, Joshi N, Vaid S, Bhoi S, Deorari A. Triageing the triage: reducing waiting time to triage in the emergency department at a tertiary care hospital in New Delhi, India. *Emerg Med J* [Internet]. 2019 Sep 1 [cited 2021 Aug 23];36(9):558–63. Available from: <https://pubmed.ncbi.nlm.nih.gov/31366625/>
17. Mahajan V, Arora S, Kaur T, Gupta S, Guglani V. Unexpected hospitalisations at a 23-hour observation unit in a paediatric emergency department of northern India. *J Clin Diagn Res* [Internet]. 2013 Jul 1 [cited 2021 Aug 23];7(7):1418–20. Available from: <https://pubmed.ncbi.nlm.nih.gov/23998079/>
18. Rominski S, Bell SA, Oduro G, Ampong P, Oteng R, Donkor P. The implementation of the South African Triage Score (SATS) in an urban teaching hospital, Ghana. *Afr J Emerg Med* [Internet]. 2014 [cited 2021 Aug 23];4(2):71–5. Available from: <https://pubmed.ncbi.nlm.nih.gov/28344927/>
19. Bruijns SR, Wallis LA, Burch VC. A prospective evaluation of the Cape triage score in the emergency department of an urban public hospital in South Africa. *Emerg Med J* [Internet]. 2008 Jul [cited 2021 Aug 23];25(7):398–402. Available from: <https://pubmed.ncbi.nlm.nih.gov/18573947/>
20. World Health Organization. The international statistical classification of diseases and health related problems ICD-10: Tabular list v. 1: Tenth revision. 2nd ed. Genève, Switzerland: World Health Organization. 2005;
21. Mena JH, Sanchez AI, Rubiano AM, Peitzman AB, Sperry JL, Gutierrez MI, et al. Effect of the modified Glasgow Coma Scale score criteria for mild traumatic brain injury on mortality prediction: comparing classic and modified Glasgow Coma Scale score model scores of 13. *J Trauma* [Internet]. 2011 Nov [cited 2021 Aug 23];71(5):1185–93. Available from: <https://pubmed.ncbi.nlm.nih.gov/22071923/>
22. Javali RH, Krishnamoorthy, Patil A, Srinivasarangan M, Suraj, Sriharsha. Comparison of Injury Severity Score, New Injury Severity Score, Revised Trauma Score and Trauma and Injury Severity Score for Mortality Prediction in Elderly Trauma Patients. *Indian J Crit Care Med* [Internet]. 2019 [cited 2021 Aug 23];23(2):73–7. Available from: <https://pubmed.ncbi.nlm.nih.gov/31086450/>

- 1  
2  
3 1 23. Champion HR, Sacco WJ, Copes WS, Gann DS, Gennarelli TA, Flanagan ME. A revision of the  
4 2 Trauma Score. *J Trauma* [Internet]. 1989 [cited 2021 Aug 23];29(5):623–9. Available from:  
5 3 <https://pubmed.ncbi.nlm.nih.gov/2657085/>  
6  
7 4 24. Fitschen-Oestern S, Lippross S, Lefering R, Klüter T, Weuster M, Franke GM, et al. Does the time  
8 5 of the day affect multiple trauma care in hospitals? A retrospective analysis of data from the  
9 6 TraumaRegister DGU®. Available from: <https://doi.org/10.1186/s12873-021-00525-0>  
10  
11 7 25. R Core Team. *R: A Language and Environment for Statistical Computing*. Vienna, Austria: R  
12 8 Foundation for Statistical Computing. 2020; Available from: <https://www.r-project.org/>  
13  
14 9 26. Ryösä A, Tainio J, Itälä A, Gullichsen E. Clinical Profile, Treatment Details and Survival of  
15 10 Trauma Patients Treated at Intensive Care Unit in a Level II Trauma Center. *J Acute Med*  
16 11 [Internet]. 2017 [cited 2022 Sep 21];7(1):19–23. Available from:  
17 12 <https://doi.org/10.6705/j.jacme.2017.0701.003>  
18  
19 13 27. Sarang B, Bhandarkar P, Raykar N, O'Reilly GM, Soni KD, Wörnberg MG, et al. Associations of  
20 14 On-arrival Vital Signs with 24-hour In-hospital Mortality in Adult Trauma Patients Admitted to  
21 15 Four Public University Hospitals in Urban India: A Prospective Multi-Centre Cohort Study. *Injury*  
22 16 [Internet]. 2021 May 1 [cited 2021 Aug 23];52(5):1158–63. Available from:  
23 17 <https://pubmed.ncbi.nlm.nih.gov/33685640/>  
24  
25 18

26  
27 19 **Figure 1: Study Flowchart**

28  
29 20 **Figure 2: Percentage distribution of different injury mechanisms among injury types (N = 4135)**

30  
31 21 **Figure 3: Patients' disposition from ED as per retrospective triage using CTS (N=4135)**  
32  
33  
34  
35  
36  
37  
38  
39  
40  
41  
42  
43  
44  
45  
46  
47  
48  
49  
50  
51  
52  
53  
54  
55  
56  
57  
58  
59  
60

1  
2  
3  
4  
5  
6  
7  
8  
9  
10  
11  
12  
13  
14  
15  
16  
17  
18  
19  
20  
21  
22  
23  
24  
25  
26  
27  
28  
29  
30  
31  
32  
33  
34  
35  
36  
37  
38  
39  
40  
41  
42  
43  
44  
45  
46  
47  
48  
49  
50  
51  
52  
53  
54  
55  
56  
57  
58  
59  
60

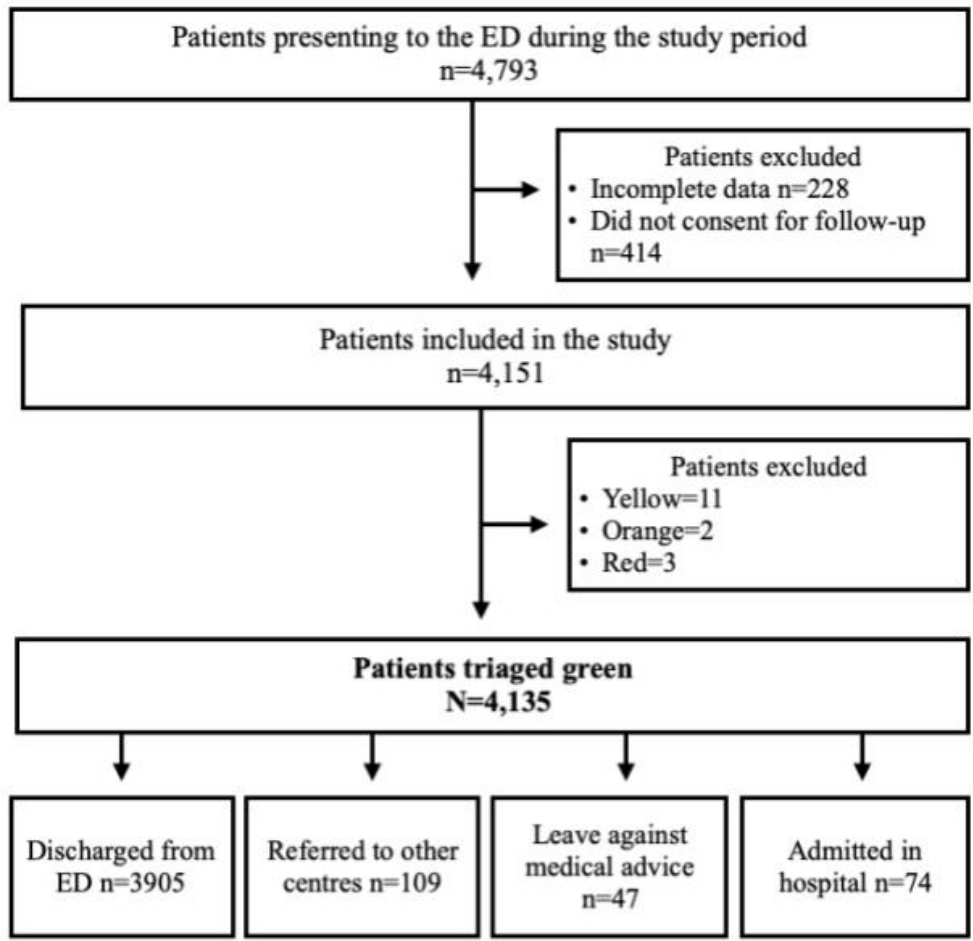

Figure 1: Study Flowchart

52x51mm (300 x 300 DPI)



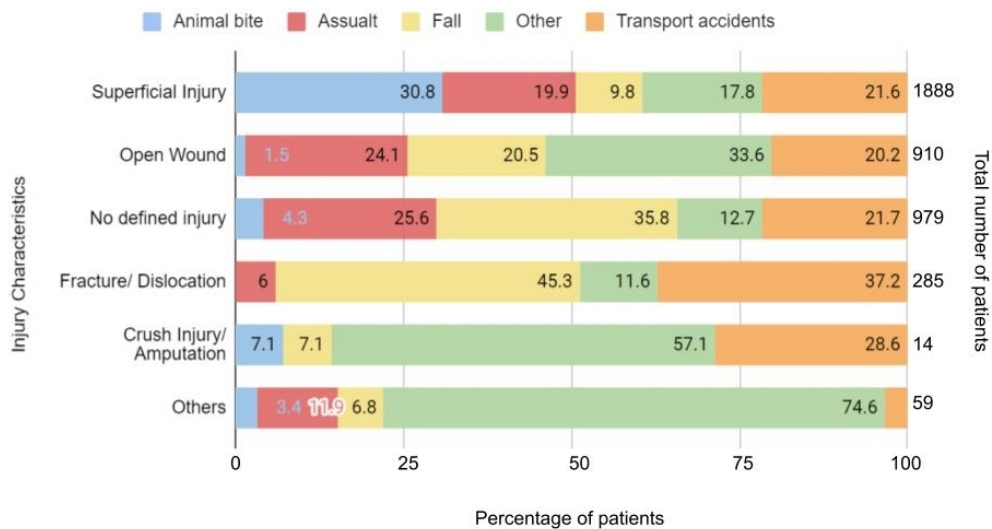

Figure 2: Percentage distribution of different injury mechanisms among injury types (N = 4135)

77x41mm (300 x 300 DPI)

1  
2  
3  
4  
5  
6  
7  
8  
9  
10  
11  
12  
13  
14  
15  
16  
17  
18  
19  
20  
21  
22  
23  
24  
25  
26  
27  
28  
29  
30  
31  
32  
33  
34  
35  
36  
37  
38  
39  
40  
41  
42  
43  
44  
45  
46  
47  
48  
49  
50  
51  
52  
53  
54  
55  
56  
57  
58  
59  
60

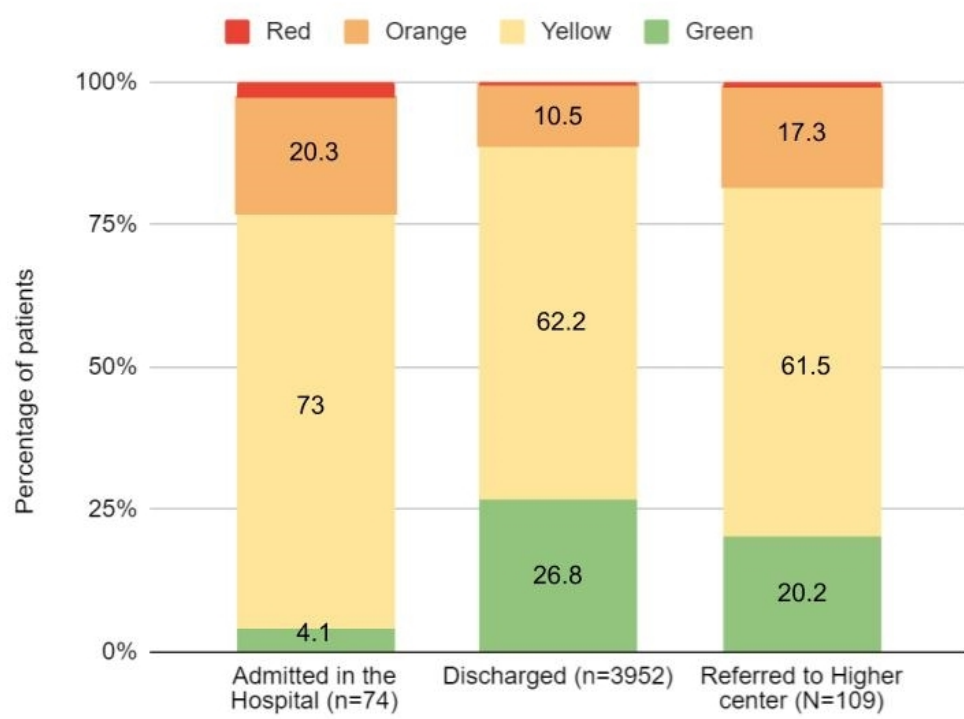

Figure 3: Patients' disposition from ED as per retrospective triage using CTS (N=4135)  
61x46mm (300 x 300 DPI)

**Table 1: Physiological and injury characteristics of patients triaged green (N=4135)**

| <b>Demographics</b>                         |               |
|---------------------------------------------|---------------|
| <i>Mechanism of Injury (%)</i>              |               |
| Transport accidents                         | 916 (22.2)    |
| Assault                                     | 870 (21)      |
| Fall                                        | 856 (20.7)    |
| Other                                       | 852 (20.6)    |
| Animal bite                                 | 641 (15.5)    |
| <i>Transfer status</i>                      |               |
| Direct                                      | 4006 (97)     |
| Transferred                                 | 129 (3)       |
| <b>Vitals</b>                               |               |
| <i>AVPU (%)</i>                             |               |
| Unresponsive                                | 3 (0.1)       |
| Pain                                        | 6 (0.1)       |
| Verbal                                      | 3 (0.1)       |
| Alert                                       | 4123 (99.7)   |
| <i>GCS (mean (SD))</i>                      | 14.98 (0.4)   |
| <i>GCS (%)</i>                              |               |
| Mild                                        | 4125 (99.8)   |
| Moderate                                    | 4 (0.1)       |
| Severe                                      | 6 (0.1)       |
| <i>Systolic blood pressure (mean (SD))</i>  | 128.05 (18.9) |
| <i>Diastolic blood pressure (mean (SD))</i> | 84.34 (13.3)  |
| <i>Heart rate (mean (SD))</i>               | 88.88 (17)    |
| <i>Oxygen saturation (mean (SD))</i>        | 97.79 (2.2)   |
| <i>Respiratory rate (mean (SD))</i>         | 22.63 (3.7)   |
| <i>Need for oxygen support (%)</i>          |               |
| Not on oxygen support                       | 4135 (100.0)  |
| <i>RTS (mean (SD))</i>                      | 7.99 (0.13)   |
| <b>Injury characteristics</b>               |               |
| <i>Type of Injury (%)</i>                   |               |
| Blunt                                       | 4075 (98.5)   |

|                                      |             |
|--------------------------------------|-------------|
| Penetrating                          | 56 (1.4)    |
| Blunt & penetrating                  | 4 (0.1)     |
| <i>Number of serious injury* (%)</i> |             |
| <hr/>                                |             |
| No serious injury                    | 4112 (99.4) |
| Single                               | 21 (0.5)    |
| Multiple                             | 2 (0.0)     |
| <i>ISS (%)</i>                       |             |
| <hr/>                                |             |
| No defined ISS                       | 2048 (49.5) |
| Mild                                 | 2072 (50.1) |
| Moderate                             | 15 (0.4)    |
| Severe                               | 0 (0.0)     |
| Profound                             | 0 (0.0)     |
| <hr/>                                |             |

\*A serious injury was defined as an injury that warrants hospitalisation.(1)

**Table 2A: The Cape Triage Score depicting the TEWS (2)**

|                                           | Adult Triage Score |              |        |         |                 |                        |               |
|-------------------------------------------|--------------------|--------------|--------|---------|-----------------|------------------------|---------------|
|                                           | 3                  | 2            | 1      | 0       | 1               | 2                      | 3             |
| Mobility                                  |                    |              |        | Walking | With help       | Stretcher/<br>Immobile |               |
| RR                                        |                    | Less than 9  |        | 9-14    | 15-20           | 21-29                  | More than 29  |
| HR                                        |                    | Less than 41 | 41-50  | 51-100  | 101-110         | 111-129                | More than 129 |
| SBP                                       | Less than 71       | 71-80        | 81-100 | 101-199 |                 | More than 199          |               |
| Temp.                                     |                    | Less than 35 |        | 35-38.4 |                 | 38.5 or more           |               |
| AVPU                                      |                    |              |        | Alert   | Reacts to Voice | Reacts to Pain         | Unresponsive  |
| Trauma                                    |                    |              |        | No      | Yes             |                        |               |
| <b>Over 12 years / taller than 150 cm</b> |                    |              |        |         |                 |                        |               |

**Table 2B: The Cape Triage Score depicting the SATS color code (2)**

| Colour               | Red                   | Orange                         | Yellow                      | Green             |
|----------------------|-----------------------|--------------------------------|-----------------------------|-------------------|
| TEWS                 | 7 or more             | 5 - 6                          | 3-4                         | 0-2               |
| Target time to treat | Immediate             | Less than 10 min               | Less than 60 min            | Less than 240 min |
| Mechanism of injury  |                       | High energy transfer           |                             |                   |
|                      |                       | Shortness of breath - acute    |                             |                   |
|                      |                       | Coughing blood                 |                             |                   |
|                      |                       | Chest pain                     |                             |                   |
|                      |                       | Haemorrhage uncontrolled       | Haemorrhage - controlled    |                   |
|                      | Seizure - current     | Seizure-post ictal             |                             |                   |
|                      |                       | Focal neurology - acute        |                             |                   |
|                      |                       | Level of consciousness reduced |                             |                   |
| Presentation         |                       | Psychosis/aggression           | All other patients          |                   |
|                      |                       | Threatened limb                |                             |                   |
|                      |                       | Dislocation - other joint      | Dislocation - finger or toe |                   |
|                      |                       | Fracture - compound            | Fracture - closed           |                   |
|                      |                       | Burn over 20%                  | Burn - other                |                   |
|                      | Burn-face/ inhalation | Burn - electrical              |                             |                   |
|                      |                       | Burn-circumferential           |                             |                   |

|                                              |                                     |                                           |                                              |
|----------------------------------------------|-------------------------------------|-------------------------------------------|----------------------------------------------|
|                                              |                                     | Burn-chemical                             |                                              |
|                                              |                                     | Poisoning/overdose                        | Abdominal pain                               |
|                                              | Hypoglycemia<br>glucose less than 3 | Diabetic - glucose over 11<br>& ketonuria | Diabetic - glucose over 17<br>(no ketonuria) |
|                                              |                                     | Vomiting - fresh blood                    | Vomiting - persistent                        |
|                                              |                                     | Pregnancy and abdominal<br>trauma or pain | Pregnancy and trauma                         |
|                                              |                                     |                                           | Pregnancy and PV bleed                       |
| Pain                                         |                                     | Severe                                    | Moderate                                     |
|                                              |                                     |                                           | Mild                                         |
| Senior health care professional's discretion |                                     |                                           |                                              |

## References

- Gardner A, Forson PK, Oduro G, Stewart B, Dike N, Glover P, et al. Diagnostic accuracy of the Kampala Trauma Score using estimated Abbreviated Injury Scale scores and physician opinion. *Injury* [Internet]. 2017 Jan 1 [cited 2021 Aug 23];48(1):177–83. Available from: <https://pubmed.ncbi.nlm.nih.gov/27908493/>
- Rominski S, Bell SA, Oduro G, Ampong P, Oteng R, Donkor P. The implementation of the South African Triage Score (SATS) in an urban teaching hospital, Ghana. *African journal of emergency medicine: Revue africaine de la medecine d'urgence* [Internet]. 2014 [cited 2021 Aug 23];4(2):71–5. Available from: <https://pubmed.ncbi.nlm.nih.gov/28344927/>

**STROBE 2007 (v4) Statement—Checklist of items that should be included in reports of *cohort studies***

| Section/Topic                | Item # | Recommendation                                                                                                                                                                       | Reported on page # |
|------------------------------|--------|--------------------------------------------------------------------------------------------------------------------------------------------------------------------------------------|--------------------|
| <b>Title and abstract</b>    | 1      | (a) Indicate the study's design with a commonly used term in the title or the abstract                                                                                               | 1                  |
|                              |        | (b) Provide in the abstract an informative and balanced summary of what was done and what was found                                                                                  | 3                  |
| <b>Introduction</b>          |        |                                                                                                                                                                                      |                    |
| Background/rationale         | 2      | Explain the scientific background and rationale for the investigation being reported                                                                                                 | 5                  |
| Objectives                   | 3      | State specific objectives, including any prespecified hypotheses                                                                                                                     | 6                  |
| <b>Methods</b>               |        |                                                                                                                                                                                      |                    |
| Study design                 | 4      | Present key elements of study design early in the paper                                                                                                                              | 6                  |
| Setting                      | 5      | Describe the setting, locations, and relevant dates, including periods of recruitment, exposure, follow-up, and data collection                                                      | 6                  |
| Participants                 | 6      | (a) Give the eligibility criteria, and the sources and methods of selection of participants. Describe methods of follow-up                                                           | 8                  |
|                              |        | (b) For matched studies, give matching criteria and number of exposed and unexposed                                                                                                  | -                  |
| Variables                    | 7      | Clearly define all outcomes, exposures, predictors, potential confounders, and effect modifiers. Give diagnostic criteria, if applicable                                             | 9 - 10             |
| Data sources/<br>measurement | 8*     | For each variable of interest, give sources of data and details of methods of assessment (measurement). Describe comparability of assessment methods if there is more than one group | 8                  |
| Bias                         | 9      | Describe any efforts to address potential sources of bias                                                                                                                            | -                  |
| Study size                   | 10     | Explain how the study size was arrived at                                                                                                                                            | -                  |
| Quantitative variables       | 11     | Explain how quantitative variables were handled in the analyses. If applicable, describe which groupings were chosen and why                                                         | 12-13              |
| Statistical methods          | 12     | (a) Describe all statistical methods, including those used to control for confounding                                                                                                | 12-13              |
|                              |        | (b) Describe any methods used to examine subgroups and interactions                                                                                                                  | -                  |
|                              |        | (c) Explain how missing data were addressed                                                                                                                                          | 12                 |
|                              |        | (d) If applicable, explain how loss to follow-up was addressed                                                                                                                       | -                  |
|                              |        | (e) Describe any sensitivity analyses                                                                                                                                                | -                  |
| <b>Results</b>               |        |                                                                                                                                                                                      |                    |

|                          |     |                                                                                                                                                                                                                                                                                                                                                                                                               |                     |
|--------------------------|-----|---------------------------------------------------------------------------------------------------------------------------------------------------------------------------------------------------------------------------------------------------------------------------------------------------------------------------------------------------------------------------------------------------------------|---------------------|
| Participants             | 13* | (a) Report numbers of individuals at each stage of study—eg numbers potentially eligible, examined for eligibility, confirmed eligible, included in the study, completing follow-up, and analysed<br>(b) Give reasons for non-participation at each stage<br>(c) Consider use of a flow diagram                                                                                                               | 13<br>-<br>Figure 1 |
| Descriptive data         | 14* | (a) Give characteristics of study participants (eg demographic, clinical, social) and information on exposures and potential confounders<br>(b) Indicate number of participants with missing data for each variable of interest<br>(c) Summarise follow-up time (eg, average and total amount)                                                                                                                | 13<br>-<br>-        |
| Outcome data             | 15* | Report numbers of outcome events or summary measures over time                                                                                                                                                                                                                                                                                                                                                | 15 -16              |
| Main results             | 16  | (a) Give unadjusted estimates and, if applicable, confounder-adjusted estimates and their precision (eg, 95% confidence interval). Make clear which confounders were adjusted for and why they were included<br>(b) Report category boundaries when continuous variables were categorized<br>(c) If relevant, consider translating estimates of relative risk into absolute risk for a meaningful time period | -<br>-<br>-         |
| Other analyses           | 17  | Report other analyses done—eg analyses of subgroups and interactions, and sensitivity analyses                                                                                                                                                                                                                                                                                                                | 16-17               |
| <b>Discussion</b>        |     |                                                                                                                                                                                                                                                                                                                                                                                                               |                     |
| Key results              | 18  | Summarise key results with reference to study objectives                                                                                                                                                                                                                                                                                                                                                      | 17-20               |
| <b>Limitations</b>       |     |                                                                                                                                                                                                                                                                                                                                                                                                               |                     |
| Interpretation           | 20  | Give a cautious overall interpretation of results considering objectives, limitations, multiplicity of analyses, results from similar studies, and other relevant evidence                                                                                                                                                                                                                                    | 20                  |
| Generalisability         | 21  | Discuss the generalisability (external validity) of the study results                                                                                                                                                                                                                                                                                                                                         | 20                  |
| <b>Other information</b> |     |                                                                                                                                                                                                                                                                                                                                                                                                               |                     |
| Funding                  | 22  | Give the source of funding and the role of the funders for the present study and, if applicable, for the original study on which the present article is based                                                                                                                                                                                                                                                 | 22                  |

\*Give information separately for cases and controls in case-control studies and, if applicable, for exposed and unexposed groups in cohort and cross-sectional studies.

**Note:** An Explanation and Elaboration article discusses each checklist item and gives methodological background and published examples of transparent reporting. The STROBE checklist is best used in conjunction with this article (freely available on the Web sites of PLoS Medicine at <http://www.plosmedicine.org/>, Annals of Internal Medicine at <http://www.annals.org/>, and Epidemiology at <http://www.epidem.com/>). Information on the STROBE Initiative is available at [www.strobe-statement.org](http://www.strobe-statement.org).



# BMJ Open

## Profile and Triage Validity of Trauma Patients Triage Green: A Prospective Cohort Study from a Secondary Care Hospital in India

|                                 |                                                                                                                                                                                                                                                                                                                                                                                                                                                                                                                                                                                                                                                                                                                                                                                                                                                                                                                                                                                                                                                                                                                                                                                                                                                                                                                                                                                                                                                                                                                                                    |
|---------------------------------|----------------------------------------------------------------------------------------------------------------------------------------------------------------------------------------------------------------------------------------------------------------------------------------------------------------------------------------------------------------------------------------------------------------------------------------------------------------------------------------------------------------------------------------------------------------------------------------------------------------------------------------------------------------------------------------------------------------------------------------------------------------------------------------------------------------------------------------------------------------------------------------------------------------------------------------------------------------------------------------------------------------------------------------------------------------------------------------------------------------------------------------------------------------------------------------------------------------------------------------------------------------------------------------------------------------------------------------------------------------------------------------------------------------------------------------------------------------------------------------------------------------------------------------------------|
| Journal:                        | <i>BMJ Open</i>                                                                                                                                                                                                                                                                                                                                                                                                                                                                                                                                                                                                                                                                                                                                                                                                                                                                                                                                                                                                                                                                                                                                                                                                                                                                                                                                                                                                                                                                                                                                    |
| Manuscript ID                   | bmjopen-2022-065036.R2                                                                                                                                                                                                                                                                                                                                                                                                                                                                                                                                                                                                                                                                                                                                                                                                                                                                                                                                                                                                                                                                                                                                                                                                                                                                                                                                                                                                                                                                                                                             |
| Article Type:                   | Original research                                                                                                                                                                                                                                                                                                                                                                                                                                                                                                                                                                                                                                                                                                                                                                                                                                                                                                                                                                                                                                                                                                                                                                                                                                                                                                                                                                                                                                                                                                                                  |
| Date Submitted by the Author:   | 20-Dec-2022                                                                                                                                                                                                                                                                                                                                                                                                                                                                                                                                                                                                                                                                                                                                                                                                                                                                                                                                                                                                                                                                                                                                                                                                                                                                                                                                                                                                                                                                                                                                        |
| Complete List of Authors:       | Anthony, Aroke; Doctors For You<br>Dutta, Rohini; - World Health Organization Collaborating Center for Research in Surgical Care Delivery in Low-and-Middle Income Countries; - Christian Medical College and Hospital, Sarang, Bhakti; World Health Organization Collaborating Centre on Research in Surgical Care Delivery in Low-Middle-Income Countries; Terna Medical College & Hospital, Department of Surgery<br>David, Siddarth; Karolinska Institutet, Department of Global Public Health<br>O'Reilly, Gerard; Monash University, Emergency medicine<br>Raykar, Nakul; Harvard Medical School, Department of Global Health and Social Medicine; Brigham and Women's Hospital, Emergency Surgery<br>Khajanchi, Monty; Seth Gowardhandas Sunderdas Medical College and King Edward Memorial Hospital, Department of Surgery<br>Attergrim, Jonatan; Karolinska Institutet<br>Soni, Kapil; All India Institute of Medical Sciences, Critical Care<br>Sharma, Naveen; All India Institute of Medical Sciences, Surgery<br>Mohan, Monali; WHO Collaboration Centre for Research in Surgical Care Delivery in LMICs, Mumbai, India,<br>Gadgil, Anita; World Health Organization Collaborating Center for Research in Surgical Care Delivery in Low-and-Middle Income Countries<br>Roy, Nobhojit; World Health Organization Collaborating Center for Research in Surgical Care Delivery in Low-and-Middle Income Countries<br>Gerdin Wärnberg, Martin ; Karolinska Institutet, Department of Global Public Health; Karolinska University Hospital |
| <b>Primary Subject Heading</b>: | Emergency medicine                                                                                                                                                                                                                                                                                                                                                                                                                                                                                                                                                                                                                                                                                                                                                                                                                                                                                                                                                                                                                                                                                                                                                                                                                                                                                                                                                                                                                                                                                                                                 |
| Secondary Subject Heading:      | Emergency medicine, Public health                                                                                                                                                                                                                                                                                                                                                                                                                                                                                                                                                                                                                                                                                                                                                                                                                                                                                                                                                                                                                                                                                                                                                                                                                                                                                                                                                                                                                                                                                                                  |
| Keywords:                       | TRAUMA MANAGEMENT, ACCIDENT & EMERGENCY MEDICINE, Trauma management < ORTHOPAEDIC & TRAUMA SURGERY                                                                                                                                                                                                                                                                                                                                                                                                                                                                                                                                                                                                                                                                                                                                                                                                                                                                                                                                                                                                                                                                                                                                                                                                                                                                                                                                                                                                                                                 |
|                                 |                                                                                                                                                                                                                                                                                                                                                                                                                                                                                                                                                                                                                                                                                                                                                                                                                                                                                                                                                                                                                                                                                                                                                                                                                                                                                                                                                                                                                                                                                                                                                    |

1  
2  
3  
4  
5  
6  
7  
8  
9  
10  
11  
12  
13  
14  
15  
16  
17  
18  
19  
20  
21  
22  
23  
24  
25  
26  
27  
28  
29  
30  
31  
32  
33  
34  
35  
36  
37  
38  
39  
40  
41  
42  
43  
44  
45  
46  
47  
48  
49  
50  
51  
52  
53  
54  
55  
56  
57  
58  
59  
60





I, the Submitting Author has the right to grant and does grant on behalf of all authors of the Work (as defined in the below author licence), an exclusive licence and/or a non-exclusive licence for contributions from authors who are: i) UK Crown employees; ii) where BMJ has agreed a CC-BY licence shall apply, and/or iii) in accordance with the terms applicable for US Federal Government officers or employees acting as part of their official duties; on a worldwide, perpetual, irrevocable, royalty-free basis to BMJ Publishing Group Ltd ("BMJ") its licensees and where the relevant Journal is co-owned by BMJ to the co-owners of the Journal, to publish the Work in this journal and any other BMJ products and to exploit all rights, as set out in our [licence](#).

The Submitting Author accepts and understands that any supply made under these terms is made by BMJ to the Submitting Author unless you are acting as an employee on behalf of your employer or a postgraduate student of an affiliated institution which is paying any applicable article publishing charge ("APC") for Open Access articles. Where the Submitting Author wishes to make the Work available on an Open Access basis (and intends to pay the relevant APC), the terms of reuse of such Open Access shall be governed by a Creative Commons licence – details of these licences and which [Creative Commons](#) licence will apply to this Work are set out in our licence referred to above.

Other than as permitted in any relevant BMJ Author's Self Archiving Policies, I confirm this Work has not been accepted for publication elsewhere, is not being considered for publication elsewhere and does not duplicate material already published. I confirm all authors consent to publication of this Work and authorise the granting of this licence.

## Profile and Triage Validity of Trauma Patients Triage Green: A Prospective Cohort Study from a Secondary Care Hospital in India

Aroke Anna Anthony,<sup>1,2</sup> Rohini Dutta,<sup>2,3</sup> Bhakti Sarang,<sup>2,4</sup> Siddarth David,<sup>5</sup> Gerard O'Reilly,<sup>6,7,8</sup> Nakul Raykar,<sup>9,10,11</sup> Monty Khajanchi,<sup>2,12</sup> Jonatan Attergrim,<sup>5,13</sup> Kapil Dev Soni,<sup>14</sup> Naveen Sharma,<sup>15</sup> Monali Mohan,<sup>2</sup> Anita Gadgil,<sup>2</sup> Nobhojit Roy,<sup>2,5,7</sup> Martin Gerdin Wörnberg<sup>5,13</sup>

<sup>1</sup> Doctors For You, Mumbai, India

<sup>2</sup> Trauma Research Group, World Health Organization Collaborating Centre on Research in Surgical Care Delivery in Low-Middle-Income Countries, Mumbai, India

<sup>3</sup> MBBS, Christian Medical College and Hospital, Ludhiana, India

<sup>4</sup> Department of Surgery, Terna Medical College & Hospital, New Mumbai, India

<sup>5</sup> Department of Global Public Health, Karolinska Institutet, Stockholm, Sweden

<sup>6</sup> Epidemiology & Biostatistics, National Trauma Research Institute, The Alfred, Melbourne, Australia

<sup>7</sup> School of Public Health & Preventive Medicine, Monash University, Melbourne, Australia

<sup>8</sup> Global programs, Emergency & Trauma Centre, The Alfred, Melbourne, Australia

<sup>9</sup> Program in Global Surgery and Social Change, Harvard Medical School, Boston, USA

<sup>10</sup> Trauma, Emergency Surgery & Surgical Critical Care, Brigham and Women's Hospital, Boston, MA, USA

<sup>11</sup> Center for Surgery and Public Health, Brigham and Women's Hospital, Boston, MA, USA

<sup>12</sup> Department of Surgery, Seth.G.S. Medical College & K.E.M. Hospital, Parel, Mumbai, India

<sup>13</sup> Function Perioperative Medicine and Intensive Care, Karolinska University Hospital, Solna, Sweden

<sup>14</sup> Critical & Intensive Care, JPN Apex Trauma Centre, AIIMS, New Delhi, India

<sup>15</sup> Department of Surgery, All India Institute of Medical Sciences, Jodhpur, India

**Corresponding Author:** Martin Gerdin Wörnberg

Department of Global Public Health, Karolinska Institutet, Stockholm, Sweden; Function Perioperative Medicine and Intensive Care, Karolinska University Hospital, Solna, Sweden.

Address: Department of Global Public Health

Karolinska Institutet

171 77 Stockholm

Email: martin.gerdin@ki.se

Phone Number: +46 708539598

**Short title:** Profile and Triage Appropriateness of Trauma Patients Triage Green in a Secondary Care Hospital in India

**Word Count (Abstract):** 228 words

1  
2  
3 **Word Count (Manuscript): 2860 words**  
4  
5  
6  
7  
8  
9  
10  
11  
12  
13  
14  
15  
16  
17  
18  
19  
20  
21  
22  
23  
24  
25  
26  
27  
28  
29  
30  
31  
32  
33  
34  
35  
36  
37  
38  
39  
40  
41  
42  
43  
44  
45  
46  
47  
48  
49  
50  
51  
52  
53  
54  
55  
56  
57  
58  
59  
60

For peer review only

**ABSTRACT**

**Objective:** To evaluate the profile of non-urgent patients triaged 'green', as part of a triage-trial in the Emergency Department (ED) of a secondary-care hospital in India. The secondary aim was to validate the triage-trial with the South African Triage Score (SATS).

**Design:** Prospective cohort study

**Setting:** A secondary care-hospital in Mumbai, India.

**Participants:** Patients aged 18 years and above with a history of trauma defined as having any of the external causes of morbidity and mortality listed in block V01-Y36, chapter XX of the International Classification of Disease version 10 (ICD-10) codebook, triaged green between July 2016 to November 2019.

**Outcome:** Outcome measures were mortality within 24-hours, 30-days and mistriage.

**Results:** We included 4135 trauma patients triaged green. The mean age of patients was 32.8 ( $\pm$ 13.1) years, and 77% were males. The median (IQR) length of stay of admitted patients was 3 (13) days. Half the patients had a mild Injury Severity Score (3-8), with the majority of injuries being blunt (98%). Of the patients triaged green by clinicians, three-quarters (74%) were undertriaged on validating with SATS. On telephonic follow-up two patients were reported dead whereas one died while admitted in-hospital.

**Conclusion:** Our study highlights the need for implementation and evaluation of training in trauma triage systems that use physiological parameters including pulse, systolic blood pressure and glasgow coma scale, for the in-hospital first responders in the EDs.

1  
2  
3 Strengths and limitations of this study:  
4

- 5
- 6 • This is a prospective cohort study, with vital signs recorded by a dedicated research officer,  
7 documenting the profile of green triaged patients from a public secondary care hospital in an urban  
8 LMIC setting conducted over a period of 3 years.  
9
  - 10 • Triage validity was assessed using a standardised and validated triage scoring system (SATS), that  
11 included both physiological parameters and injury characteristics of the patients.  
12
  - 13 • The study provides data from a single secondary care hospital in Mumbai. Therefore, the results  
14 cannot be generalised to other Indian hospitals due to hospital bias.  
15
  - 16 • Only the first 10 consecutive patients' data were collected each shift during the study period.  
17
  - 18 • Data on 30-day mortality was missing for some patients while we have no data on patient morbidity.  
19  
20  
21  
22  
23  
24  
25  
26  
27  
28  
29  
30  
31  
32  
33  
34  
35  
36  
37  
38  
39  
40  
41  
42  
43  
44  
45  
46  
47  
48  
49  
50  
51  
52  
53  
54  
55  
56  
57  
58  
59  
60

## INTRODUCTION

Globally, 4.4 million people die from trauma annually, with India contributing to 20% of this burden. [1]

Trauma represents the second most common cause of death after age five in India with the majority of deaths attributable to road traffic-related deaths.[2,3] With 50% of deaths due to trauma occurring in the hospitals, there is an urgent need to strengthen in-hospital care for trauma patients.[4]

Trauma care is highly time-sensitive.[5] Hospital triage systems can ensure that critically ill patients are identified and receive care promptly.[6] Several triage scores are used across different countries and hospital settings. [7,8]

India's high population density, poorly developed prehospital care and a lack of appropriate referral systems leads to overcrowding in the emergency departments (EDs). [9–12] Most EDs lack triage protocols and the level of emergency patient care is decided by clinicians who are not trained specifically in trauma care.[13,14] The overcrowding diverts resources from patients requiring immediate care.

In our study, clinicians at a triage-naïve ED were introduced to a triage-trial, as part of a multicentre triage project, the Trauma Triage Study in India (TTRIS). TTRIS compared prediction models for triage in adult trauma patients presenting to various emergency departments across India.[15] In TTRIS, the patients were tacitly designated one of the four trauma triage categories by clinicians, based on their understanding of trauma triage; into red, orange, yellow, green, with red and green denoting the most and least urgent patient status respectively.

We aimed to evaluate the profile of the non-urgent patients who were triaged green by clinicians and retrospectively compare the validity of this category using the South African Triage Score (SATS). [16,17]



## METHODOLOGY

### *Study Design*

This single-centre prospective cohort study between July 2016 to November 2019 is part of the TTRIS which compares prediction models for triage in adult trauma patients presenting to various emergency departments across India.

### *Study Setting*

The study site was the ED of Khurshedji Behramji Bhabha Hospital (KBBH), a 436 bedded regional secondary healthcare centre located in Mumbai, India, catering to approximately 350 patients each day in the ED. It is a public hospital with free or nominal fees, providing access to low socio-economic groups and receives patients from across the city. At KBBH, trauma care is imparted as a subspeciality along with medical, surgical, and obstetric care. The hospital has an intensive care facility but there is no neurosurgery department, so patients in need of neurosurgical management are referred to tertiary care centres. Plain radiography and ultrasonography are available round the clock; however computerised tomography (CT) is only available in-house from 7am to 6pm. The patients arriving at the ED are first seen by a casualty medical officer (CMO) largely on a first-come, first-served basis without a formalised system of triaging patients.

### *Clinician's Tacit Triage (CTT)*

As part of data collection of TTRIS, the triage-naive clinicians were only given standard comparable labels to different trauma triage colour categories, without provision to any formal tool or training about the same. The clinicians involved have a minimum of 2 years clinical experience, however, they are neither trained in trauma care as a speciality nor are they necessarily trained in trauma management courses like Advanced Trauma Life Support (ATLS). After their initial on-arrival assessment of each patient, the research officers asked the clinicians to categorise the urgency of patients into the aforementioned colour-coded triage groups,[15] henceforth referred to as the CTT. The CTT was just based on the clinician's experiential and intuitive clinical knowledge. For doing this, the clinicians were

1  
2  
3 allowed to use all available information that was extracted by them during initial routine assessment. The  
4  
5 CTTs were not used to determine treatment decisions in the ED as there was no formalised tool or  
6  
7 protocol in place for assigning the triage and coupling it with patient management. The clinicians were  
8  
9 individually informed about the aim and methodology used for the TTRIS study; however, the clinicians  
10  
11 were neither involved in the conception nor were they part of the research team analysing the results.  
12

### 13 ***Participants***

14  
15  
16 *Inclusion Criteria:* We included all the patients aged 18 years and above presenting to the KBBH ED with  
17  
18 a history of trauma as their primary complaint and triaged green by clinical triage on initial evaluation  
19  
20 irrespective of their injury severity. A history of trauma was defined here as having any of the external  
21  
22 causes of morbidity and mortality listed in block V01-Y36, chapter XX of the International Classification  
23  
24 of Disease version 10 (ICD-10) online codebook, with some exclusions (see online supplementary  
25  
26 material).[18]  
27

28  
29 *Exclusion Criteria:* Patients with missing data in one or more variables used for analysis or who did not  
30  
31 consent to follow-up were excluded from the analysis.  
32

### 33 ***Source and methods of selection of participants and follow-up***

34  
35 The research officer at KBBH observed morning, evening and night shifts (6-hour observational shifts).  
36  
37 These shifts were not aligned with the working hours of the clinical staff to reduce bias and accounting for  
38  
39 shift fatigue of the clinicians. Due to the large patient load and time and budgetary constraints of the project,  
40  
41 data were collected from the first 10 consecutive patients only, irrespective of their CTT, who presented  
42  
43 during each shift. The research officer collected the vital signs but was in no way involved in patient  
44  
45 assessment or management.  
46

47  
48 The research officer performed follow-up at 24-hours, 30-days after arrival at the ED. The follow-up was  
49  
50 completed in-person or by telephone, depending on whether the patient was still hospitalised or if the patient  
51  
52 had been discharged. The phone numbers of one or more contact persons, mostly relatives, were collected  
53  
54 on enrolment and those people were contacted if the participant did not reply to the follow-up telephone  
55  
56  
57  
58  
59  
60

calls. The outcome was recorded as missing if neither the patient nor the relative were available for follow-up at the specified time-points.

### ***Variables collected for retrospective assessment***

To evaluate the profile of patients triaged green we analysed the 24 hours and 30 days mortality, age, sex, mechanism of injury, injury-related details, assigned CTT level, ward or intensive care unit (ICU) admission status, and physiological measures. The physiological measures were systolic blood pressure (SBP), respiratory rate (RR), heart rate (HR), peripheral capillary oxygen saturation (SpO<sub>2</sub>), Glasgow Coma Scale (GCS) and Alert Verbal Pain unresponsive scale (AVPU).

GCS was categorised into no or mild traumatic brain injury (TBI) (13-15), moderate TBI (9-12), severe TBI (3-8).[19] Length of stay in the hospital (LoS) was calculated using the data and time of admission in the hospital to the data and time of discharge alive from the hospital, mortality, leave against medical advice (LAMA) or abscond. Injury severity score (ISS) was allocated retrospectively with 'mild' (3-8), 'moderate' (9-15), 'severe' (16-25) and 'profound' (>25) categories. Patients for whom ISS could not be coded, for example when there were no recorded injuries, were assigned 'no defined ISS'. [20] The revised trauma score (RTS) which includes GCS, SBP, and RR and excludes capillary refill and respiratory expansion, which were difficult to assess in the field was computed and categorised as RTS < 4 and RTS > 4.[20,21] Injuries were recorded and coded using ICD-10 in the TTRIS dataset. Patients were divided into categories with respect to the most critical injury namely, crush injury, injury to internal organs, blood vessel injury, amputation, fracture, dislocation, burn, multiple injury, unspecified injury, open wound, superficial injury.[18] Injury characteristics of patients that presented to the ED with no injuries were categorised as 'no defined injury'. For patients with multiple injuries, the more critical one was considered for categorising patients as per injury. Time of arrival of patients was categorised into four groups, namely, morning (6am-11:59am), afternoon (12pm – 5:59pm), evening (6pm – 11:59pm), and night (12am – 5:59 am).[22]

To determine the validity of CTT, we retrospectively used SATS. SATS has two components, Triage Early Warning Score (TEWS) which uses the physiological parameters and the SATS clinical discriminators

1  
2  
3 (SATScd) that use pathology of the patient to triage.[16] Retrospectively calculated variables and triage  
4 categories are henceforth labelled with a prefix r, for example, rSATS. First the rTEWS was calculated and  
5 then matched for rSATScd. If a clinical discriminator, such as fracture or dislocation, was present the  
6 rSATS was updated to match the triage level assigned to each SATScd (See online supplementary material),  
7 to be classified into rRed, rOrange, rYellow and rGreen.  
8  
9  
10  
11  
12

### 13 ***Bias***

14  
15  
16 There were three layers of quality control. First, data was entered using a dedicated electronic data  
17 collection instrument with extensive logical checks and prompts for unlikely but possible values. Second,  
18 the collected data were reviewed on a weekly basis and discussed during weekly online conferences with  
19 all research officers and the project leads throughout the duration of the data collection period. Third, on-  
20 site quality control sessions were conducted every 3-4 months. During these sessions, a second research  
21 officer collected data alongside the research officer who worked at the ED. The quality-controlled data was  
22 then compared with the standard data.  
23  
24  
25  
26  
27  
28  
29  
30

### 31 ***Patient and Public Involvement***

32  
33 No patients were involved in the design of the study.  
34

### 35 ***Statistical Methods***

36  
37  
38 Data was analysed using R version 4.04 statistical software.[23] Complete case analysis was performed to  
39 only include patients with complete data. We describe the sample using frequencies and percentages for  
40 categorical variables, and mean and standard deviation (SD) for normally distributed continuous variables  
41 and median and inter quartile range (IQR) for non-normally distributed continuous variables. The number  
42 of patients triaged green by the SATS was divided by the number of patients triaged green as per clinician  
43 triage (4135), the resultant proportion minus one was considered as the proportion of patients mis-triaged.  
44  
45  
46  
47  
48  
49

### 50 ***Ethical clearance***

51  
52  
53 Ethics committee approval for TTRIS was obtained from the ethics and scientific committee of KBBH  
54 (KBBH, HO/4982/KBB,12/08/2016).  
55  
56  
57  
58  
59  
60

## RESULTS

In the study, 4151 patients were included of which 4135 (99.6%) patients were triaged green by CTT (Figure 1).

### *Profile of patients triaged green*

The mean age of patients was  $32.8 \pm 13.1$  years with 3172 (77%) males. Notably, of all patients triaged green, 10/4135 (0.24%) patients presented with moderate to severe GCS and 0.3% of patients did not have an AVPU of alert. Majority of patients (97%) triaged green presented to the study-site directly without a primary care hospital referral.

Of the total patients triaged green by CTT, 46% of patients had only superficial injuries of which majority (30.8%) were due to animal bites. Further, 24% had no external injuries on examination. Among those referred to other centres, the most common types of injury identified were superficial injuries (34) followed by open wounds (27) and patients with no documented injury (19). The reasons for referral to other centres were not documented. As per ISS, 50.2% of patients had 'mild' and 0.4% had 'moderate' score and the remaining 49.5% patients had 'no defined ISS'. Figure 2 shows the different injury types as per mechanism of injury in the study population. Amongst those that had a transport accident, 881/916 (96.17%) were patients who had a road traffic injury.

The ED disposition of all the patients is shown in Figure 1. The median (IQR) LoS of those admitted to the hospital was 3 (13) days and seven patients required admission in the ICU. Most admitted patients 62/74 (83.8%) were successfully discharged from the hospital while three were transferred to other centres for further management. Further, there were eight patients that took LAMA and one who died during their hospital stay.

Follow up at 30 days was successful for 3832/4135 (92.7%) of patients. Three patients died during the first 30 days. Of these patients, two had a GCS of  $<8$  on initial evaluation. The rSATS triage of these patients were rYellow and rOrange.

### *Evaluation of triage validity through rSATS*

We found that of the total number of patients that were triaged green by CTT (N=4135), 24 patients were triaged rRed, 448 patients were triaged rOrange and 2579 patients were triaged rYellow as per rSATS indicating that 73.8% patients were undertriaged by CTT. Proportions of undertriage were higher during the night and afternoon (**Table 1A**). Of these, most patients (97%) were found to have been undertriaged after assessing their physiological parameters from rTEWS while others due to the rSATScd as seen in **Table 1B**. In **Figure 3** the disposition of these patients from the ED as per their rSATS is depicted. Notably, of the total three documented deaths, one occurred in a patient who was admitted in the hospital and triaged rOrange, and one in a patient transferred to a different centre triaged rYellow. **Table 1C** shows the rSATS of patients with fractures, dislocation and amputations.

**Table 1 A: Patients undertriaged as per the time of the day [24]**

|                    | <b>Morning</b> | <b>Afternoon</b> | <b>Evening</b> | <b>Night</b> | <b>p</b> |
|--------------------|----------------|------------------|----------------|--------------|----------|
| n                  | 756            | 1576             | 1155           | 648          |          |
| <b>Undertriage</b> | 511 (67.6)     | 1185 (75.2)      | 858 (74.3)     | 497 (76.7)   | <0.001   |

**Table 1 B: Patients undertriaged as per rSATS (N=4135)**

| <b>rSATS</b>   | <b>rGreen</b> | <b>rYellow</b> | <b>rOrange</b> | <b>rRed</b> |
|----------------|---------------|----------------|----------------|-------------|
| n              | 1084          | 2579           | 448            | 24          |
| <b>rTEWS</b>   | 1084 (100)    | 2513 (97.4)    | 433 (96.7)     | 19 (79.2)   |
| <b>rSATScd</b> | 0             | 66 (2.6)       | 15 (3.3)       | 5 (20.8)    |

**Table 1 C: Injury characteristics as per the rSATS Triage category**

| <b>rSATS</b>             | <b>rGreen</b> | <b>rYellow</b> | <b>rOrange</b> | <b>rRed</b> | <b>p</b> |
|--------------------------|---------------|----------------|----------------|-------------|----------|
| n                        | 1084          | 2579           | 448            | 24          |          |
| Amputation/ Crush Injury | 0 (0.0)       | 13 (0.5)       | 1 (0.2)        | 0 (0.0)     | <0.001   |

|                    |                      |            |             |            |          |
|--------------------|----------------------|------------|-------------|------------|----------|
|                    | Fracture/Dislocation | 0 (0.0)    | 243 (9.4)   | 41 (9.2)   | 1 (4.2)  |
| <b>Injury Type</b> | Others               | 9 (0.8)    | 36 (1.4)    | 9 (2.0)    | 5 (20.8) |
|                    | Open wound           | 204 (18.8) | 575 (22.3)  | 123 (27.5) | 8 (33.3) |
|                    | Superficial Injury   | 635 (58.6) | 1074 (41.6) | 174 (38.8) | 5 (20.8) |
|                    | No defined Injury    | 236 (21.8) | 638 (24.7)  | 100 (22.3) | 5 (20.8) |

## DISCUSSION

### *Main Findings*

Blunt trauma was seen as the most common type of injury.[24] Transport accidents was the predominant mechanism of injury and 77% patients were males. Most patients had mild ISS (50.2%) and only about 0.4% patients had moderate ISS with no patients in the severe and profound ISS category. Most patients presented with seemingly superficial injuries. The presentation of 15.5% of patients with animal bites was unique to our setting. These patients mainly presented for vaccinations following animal bites more frequently than for the treatment of bite injuries.

This study shows that approximately three quarters (74%) of patients triaged green by CTT were undertriaged when compared to rSATS. Out of 4135 patients triaged green by CTT only 1084/4135 (26.2%) were triaged green according to the rSATS. Most of these patients (97%) were coming in as direct arrival to this secondary-care hospital. According to CTT, patients were triaged green even with GCS moderate to severe (10/4135, 0.24%) and 0.3% of patients did not have an AVPU of alert and were still triaged green.

In addition to the high proportion of undertriage ascertained by rTEWS, of those admitted, seven required admissions to the ICU indicating they may have required urgent management for their condition. On a closer look at the physiological parameters of the three patients found dead on 30-day follow-up, it was seen that two of them were under triaged on initial evaluation as they had a GCS < 8.

### *Interpretation and Clinical relevance*

1  
2  
3 Among the green triaged patients, there were patients whose physiological parameters indicated that they  
4 required urgent attention although the proportion of these patients is relatively low compared to our sample  
5 size. These findings emphasise the need for an ED triage and an effective referral system based on on-scene  
6 triage. Additionally, they highlight the efficacy of physiological scores such as TEWS, a component of  
7 SATS, in triaging patients accurately and the need to include GCS assessment for all patients presenting to  
8 the ED. Reasons for these patients being undertriaged must be explored extensively to enhance healthcare  
9 delivery in the EDs. Although the reasons for this undertriage are multifactorial, in this case, the lack of  
10 appropriate training or standard, uniform protocol for patient management in the ED to quickly identify  
11 these patients among those that have normal physiological parameters is most evident. The other factor,  
12 overcrowding of the ED with limitation of resources, may also lead to inadequate trauma care.[25]  
13  
14  
15  
16  
17  
18  
19  
20  
21  
22  
23

### 24 ***Strengths***

25  
26  
27 This is a prospective cohort study, with vital signs recorded by a dedicated research officer, documenting  
28 the profile of green triaged patients from a public secondary care hospital in an urban LMIC setting  
29 conducted over a period of 3 years. Triage validity was assessed using a standardised and validated triage  
30 scoring system (SATS), that included both physiological parameters and injury characteristics of the  
31 patients.  
32  
33  
34  
35  
36  
37  
38

### 39 ***Limitations***

40  
41 Firstly, the study provides data from a single secondary care centre, results of which may not be  
42 generalisable to other secondary care hospitals or other Indian healthcare settings. Secondly, to ensure  
43 feasibility, data of only 10 consecutive patients were collected in each shift. Thirdly, we did not have data  
44 on the number of clinicians that participated in the triaging process or how they acquired knowledge and  
45 skills to triage patients. Lastly, 30-day mortality was missing for some patients while we have none on  
46 morbidity. This is a limiting factor towards assessing the morbidity gains.  
47  
48  
49  
50  
51  
52  
53

### 54 **CONCLUSION**



1  
2  
3 Three-fourths (74%) of the patients triaged green by clinicians in a secondary care hospital in Mumbai were  
4 undertriaged when analysed using rSATS. This highlights the need for implementation and evaluation of  
5 trauma triage training, involving systems that rely on presenting physiological parameters, for clinicians,  
6 nurses and other paramedical staff in the EDs. Additionally, direct admissions of the non-urgent patients to  
7 this secondary-care hospital warrants strengthening the referral systems to avoid overcrowding of the Indian  
8 EDs.  
9  
10  
11  
12  
13  
14  
15  
16  
17

## 18 LIST OF ABBREVIATIONS

19  
20  
21  
22  
23 Emergency department (ED), Trauma Triage Study in India (TTRIS), South African Triage Scale (SATS),  
24 Triage Early Warning Score (TEWS), Low- and Middle-Income Country (LMIC), Khurshedji Behramji  
25 Bhabha Hospital (KBBH), Computerized Tomography (CT), Casualty Medical Officer (CMO), Clinician's  
26 Tacit Triage (CTT), International Classification of Disease version 10 (ICD-10), Intensive Care Unit (ICU),  
27 Systolic blood pressure (SBP), Respiratory rate (RR), Heart rate (HR), Peripheral capillary oxygen  
28 saturation (SpO<sub>2</sub>), Glasgow Coma Scale (GCS), Alert Verbal Pain unresponsive scaled (AVPU), Traumatic  
29 Brain Injury (TBI), Length of stay in the hospital (LoS), Leave against medical advice (LAMA), Injury  
30 Severity Score (ISS), Revised Trauma Score (RTS), Retrospective SATS (rSATS), Retrospective TEWS  
31 (rTEWS), Retrospective SATS clinical discriminators (rSATScd), Retrospective Green (rGreen),  
32 Retrospective Yellow (rYellow), Retrospective Orange (rOrange), Retrospective Red (rRed), Standard  
33 deviation (SD), Inter quartile range (IQR)  
34  
35  
36  
37  
38  
39  
40  
41  
42  
43  
44  
45

## 46 DECLARATIONS

### 47 *Ethical clearance*

48  
49  
50 Ethics committee approval for TTRIS was obtained from the ethics and scientific committee of KBBH  
51 (KBBH, HO/4982/KBB,12/08/2016). Informed consent for follow-up was taken from patients at the time  
52  
53  
54  
55  
56  
57  
58  
59  
60

of discharge from the hospital. In case the patient was unconscious, consent was obtained from a family member or the patient's legally acceptable representative.

### ***Consent for publication***

Not Applicable

### ***Availability of data and materials***

The data are available to whoever wants them by emailing the corresponding author. They can write their aims and objectives, and then, the authors can decide if that study can be done without duplication of the work.

### ***Competing Interests***

There is no conflict of interest to disclose from any of the authors

### ***Funding***

The data collection for TTRIS was funded by grants from the Swedish National Board of Health and Welfare, grant numbers 22464/2017 and 23745/2016.

### ***Author Contribution***

Authors AA, RD, BS, SD and MGW have conceptualized the study. AA and RD analysed the data and AA, RD, BS were involved in the interpretation of the data and manuscript writing. GR, NR, MK, JA, KDS, NS, MM, AG, NR, and MGW contributed to the study design and critical revisions to the manuscript. All authors have contributed to drafting the article and revising it. They also approved the final version of the manuscript. All authors agree to be responsible for all aspects of the work.

### ***Acknowledgments***

We thank the Thursday Truth Seekers (TTS) and the Trauma Triage Study in India (TTRIS), India, research team for their support.

### **REFERENCES**

1. GBD 2017 Causes of Death Collaborators. Global, regional, and national age-sex-specific mortality for 282 causes of death in 195 countries and territories, 1980-2017: a systematic analysis for the Global

- 1  
2  
3 Burden of Disease Study 2017. *Lancet* [Internet]. 2018 Nov 10 [cited 2021 Aug 23];392(10159):1736–88.  
4 Available from: <https://pubmed.ncbi.nlm.nih.gov/30496103/>  
5
- 6 2. World Health Organization. WHO country cooperation strategy at a glance : India. 2018. Available from:  
7 <https://apps.who.int/iris/handle/10665/136895>  
8
- 9 3. Government of India. Ministry of Road Transport & Highways Transport Research Wing. Road  
10 Accidents in India 2019. 2019; Available from: [https://morth.nic.in/sites/default/files/RA\\_Uploading.pdf](https://morth.nic.in/sites/default/files/RA_Uploading.pdf)  
11
- 12 4. G G. Injuries in India: A national perspective. *Burden of Disease in India Equitable Development -*  
13 *Healthy Future New Delhi: National Commission on Macroeconomics and Health, Ministry of Health &*  
14 *Family Welfare, Government of India.* 2005;325–347. Available from:  
15 [http://www.drbramedkarcollege.ac.in/sites/default/files/Burden of disease in India.pdf#page=343](http://www.drbramedkarcollege.ac.in/sites/default/files/Burden%20of%20disease%20in%20India.pdf#page=343)  
16
- 17 5. Fitzgerald M, Cameron P, Mackenzie C, Farrow N, Scicluna P, Gocentas R, et al. Trauma resuscitation  
18 errors and computer-assisted decision support. *Arch Surg* [Internet]. 2011 Feb [cited 2021 Aug  
19 23];146(2):218–25. Available from: <https://pubmed.ncbi.nlm.nih.gov/21339436/>  
20
- 21 6. Cameron P, Gabbe B, Smith K, Mitra B. Triaging the right patient to the right place in the shortest time.  
22 *Br J Anaesth* [Internet]. 2014 [cited 2021 Aug 23];113(2):226–33. Available from:  
23 <https://pubmed.ncbi.nlm.nih.gov/24961786/>  
24
- 25 7. Twomey M, Wallis LA, Thompson M lou, Myers JE. The South African Triage Scale (adult version)  
26 provides reliable acuity ratings. *Int Emerg Nurs* [Internet]. 2012 Jul [cited 2021 Aug 23];20(3):142–50.  
27 Available from: <https://pubmed.ncbi.nlm.nih.gov/22726946/>  
28
- 29 8. Ebrahimi M, Heydari A, Mazlom R, Mirhaghi A. The reliability of the Australasian Triage Scale: a meta-  
30 analysis. *World J Emerg Med* [Internet]. 2015 [cited 2021 Aug 23];6(2):94. Available from:  
31 <https://pubmed.ncbi.nlm.nih.gov/26056538/>  
32
- 33 9. Roy N, Murlidhar V, Chowdhury R, Patil SB, Supe PA, Vaishnav PD, et al. Where there are no  
34 emergency medical services-prehospital care for the injured in Mumbai, India. *Prehosp Disaster Med*  
35 [Internet]. 2010 [cited 2021 Aug 23];25(2):145–51. Available from:  
36 <https://pubmed.ncbi.nlm.nih.gov/20467994/>  
37
- 38 10. Woolard RH, Borron SW MJM. Emergency Department Design. In: *Ciottone's Disaster Medicine.*  
39 Elsevier. 2016;125–130.  
40
- 41 11. Kumar S, Kumar S, Gupta B. Urban health: Needs urgent attention. *Indian J Public Health* [Internet].  
42 2018 Jul 1 [cited 2021 Aug 23];62(3):214–7. Available from: <https://pubmed.ncbi.nlm.nih.gov/30232971/>  
43
- 44 12. Bashar MA, Bhattacharya S, Tripathi S, Sharma N, Singh A. Strengthening primary health care through  
45 e-referral system. *J Family Med Prim Care* [Internet]. 2019 [cited 2021 Aug 23];8(4):1511–3. Available  
46 from: <https://pubmed.ncbi.nlm.nih.gov/31143753/>  
47
- 48 13. Gidwani S, Jena NN. Perspective article for *European Journal of Emergency Medicine: emergency*  
49 *medicine in India.* *Eur J Emerg Med* [Internet]. 2020 [cited 2021 Aug 23];27(5):317–8. Available from:  
50 <https://pubmed.ncbi.nlm.nih.gov/32852409/>  
51
- 52 14. McHugh M, Tanabe P, McClelland M, Khare RK. More patients are triaged using the Emergency  
53 Severity Index than any other triage acuity system in the United States. *Acad Emerg Med* [Internet]. 2012  
54 Jan [cited 2021 Aug 23];19(1):106–9. Available from: <https://pubmed.ncbi.nlm.nih.gov/22211429/>  
55  
56  
57

15. Gerdin LW, Khajanchi M, Kumar V, Roy N, Saha ML, Soni KD, et al. Comparison of emergency department trauma triage performance of clinicians and clinical prediction models: a cohort study in India. *BMJ Open* [Internet]. 2020 Feb 18 [cited 2021 Aug 23];10(2). Available from: <https://pubmed.ncbi.nlm.nih.gov/32075827/>
16. Rominski S, Bell SA, Oduro G, Ampong P, Oteng R, Donkor P. The implementation of the South African Triage Score (SATS) in an urban teaching hospital, Ghana. *Afr J Emerg Med* [Internet]. 2014 [cited 2021 Aug 23];4(2):71–5. Available from: <https://pubmed.ncbi.nlm.nih.gov/28344927/>
17. Bruijns SR, Wallis LA, Burch VC. A prospective evaluation of the Cape triage score in the emergency department of an urban public hospital in South Africa. *Emerg Med J* [Internet]. 2008 Jul [cited 2021 Aug 23];25(7):398–402. Available from: <https://pubmed.ncbi.nlm.nih.gov/18573947/>
18. World Health Organization. The international statistical classification of diseases and health related problems ICD-10: Tabular list v. 1: Tenth revision. 2nd ed. Genève, Switzerland: World Health Organization. 2005;
19. Mena JH, Sanchez AI, Rubiano AM, Peitzman AB, Sperry JL, Gutierrez MI, et al. Effect of the modified Glasgow Coma Scale score criteria for mild traumatic brain injury on mortality prediction: comparing classic and modified Glasgow Coma Scale score model scores of 13. *J Trauma* [Internet]. 2011 Nov [cited 2021 Aug 23];71(5):1185–93. Available from: <https://pubmed.ncbi.nlm.nih.gov/22071923/>
20. Javali RH, Krishnamoorthy, Patil A, Srinivasarangan M, Suraj, Sriharsha. Comparison of Injury Severity Score, New Injury Severity Score, Revised Trauma Score and Trauma and Injury Severity Score for Mortality Prediction in Elderly Trauma Patients. *Indian J Crit Care Med* [Internet]. 2019 [cited 2021 Aug 23];23(2):73–7. Available from: <https://pubmed.ncbi.nlm.nih.gov/31086450/>
21. Champion HR, Sacco WJ, Copes WS, Gann DS, Gennarelli TA, Flanagan ME. A revision of the Trauma Score. *J Trauma* [Internet]. 1989 [cited 2021 Aug 23];29(5):623–9. Available from: <https://pubmed.ncbi.nlm.nih.gov/2657085/>
22. Fitschen-Oestern S, Lippross S, Lefering R, Klüter T, Weuster M, Franke GM, et al. Does the time of the day affect multiple trauma care in hospitals? A retrospective analysis of data from the TraumaRegister DGU®. Available from: <https://doi.org/10.1186/s12873-021-00525-0>
23. R Core Team. R: A Language and Environment for Statistical Computing. Vienna, Austria: R Foundation for Statistical Computing. 2020; Available from: <https://www.r-project.org/>
24. Ryösä A, Tainio J, Itälä A, Gullichsen E. Clinical Profile, Treatment Details and Survival of Trauma Patients Treated at Intensive Care Unit in a Level II Trauma Center. *J Acute Med* [Internet]. 2017 [cited 2022 Sep 21];7(1):19–23. Available from: <https://doi.org/10.6705/j.jacme.2017.0701.003>
25. Sarang B, Bhandarkar P, Raykar N, O'Reilly GM, Soni KD, Wärnberg MG, et al. Associations of On-arrival Vital Signs with 24-hour In-hospital Mortality in Adult Trauma Patients Admitted to Four Public University Hospitals in Urban India: A Prospective Multi-Centre Cohort Study. *Injury* [Internet]. 2021 May 1 [cited 2021 Aug 23];52(5):1158–63. Available from: <https://pubmed.ncbi.nlm.nih.gov/33685640/>

### Figure 1: Study Flowchart

### Figure 2: Percentage distribution of different injury mechanisms among injury types (N = 4135)

1  
2  
3 **Figure 3: Patients' disposition from ED as per retrospective triage using CTS (N=4135)**  
4  
5  
6  
7  
8  
9  
10  
11  
12  
13  
14  
15  
16  
17  
18  
19  
20  
21  
22  
23  
24  
25  
26  
27  
28  
29  
30  
31  
32  
33  
34  
35  
36  
37  
38  
39  
40  
41  
42  
43  
44  
45  
46  
47  
48  
49  
50  
51  
52  
53  
54  
55  
56  
57  
58  
59  
60

For peer review only

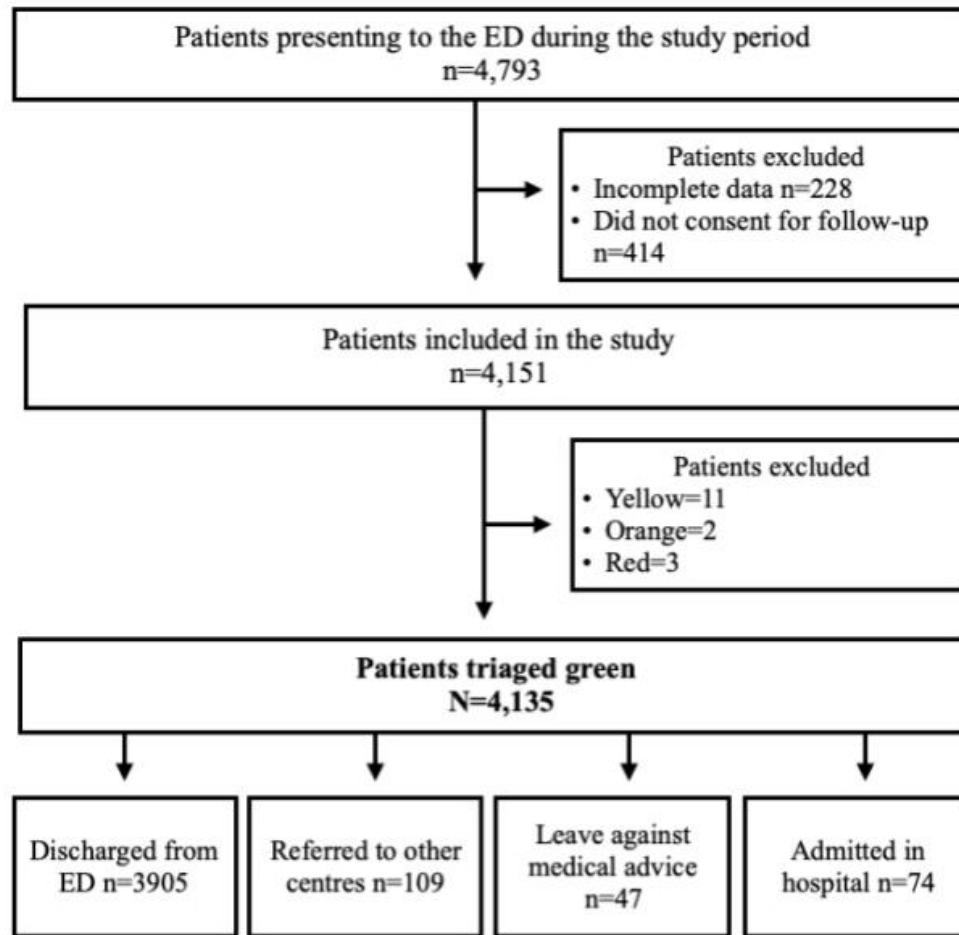

Figure 1: Study Flowchart

52x51mm (300 x 300 DPI)



Figure 2: Percentage distribution of different injury mechanisms among injury types (N = 4135)

77x41mm (300 x 300 DPI)

1  
2  
3  
4  
5  
6  
7  
8  
9  
10  
11  
12  
13  
14  
15  
16  
17  
18  
19  
20  
21  
22  
23  
24  
25  
26  
27  
28  
29  
30  
31  
32  
33  
34  
35  
36  
37  
38  
39  
40  
41  
42  
43  
44  
45  
46  
47  
48  
49  
50  
51  
52  
53  
54  
55  
56  
57  
58  
59  
60



Figure 3: Patients' disposition from ED as per retrospective triage using CTS (N=4135)  
61x46mm (300 x 300 DPI)



**Table 1: Physiological and injury characteristics of patients triaged green (N=4135)**

| <b>Demographics</b>                         |               |
|---------------------------------------------|---------------|
| <i>Mechanism of Injury (%)</i>              |               |
| Transport accidents                         | 916 (22.2)    |
| Assault                                     | 870 (21)      |
| Fall                                        | 856 (20.7)    |
| Other                                       | 852 (20.6)    |
| Animal bite                                 | 641 (15.5)    |
| <i>Transfer status</i>                      |               |
| Direct                                      | 4006 (97)     |
| Transferred                                 | 129 (3)       |
| <b>Vitals</b>                               |               |
| <i>AVPU (%)</i>                             |               |
| Unresponsive                                | 3 (0.1)       |
| Pain                                        | 6 (0.1)       |
| Verbal                                      | 3 (0.1)       |
| Alert                                       | 4123 (99.7)   |
| <i>GCS (mean (SD))</i>                      | 14.98 (0.4)   |
| <i>GCS (%)</i>                              |               |
| Mild                                        | 4125 (99.8)   |
| Moderate                                    | 4 (0.1)       |
| Severe                                      | 6 (0.1)       |
| <i>Systolic blood pressure (mean (SD))</i>  | 128.05 (18.9) |
| <i>Diastolic blood pressure (mean (SD))</i> | 84.34 (13.3)  |
| <i>Heart rate (mean (SD))</i>               | 88.88 (17)    |
| <i>Oxygen saturation (mean (SD))</i>        | 97.79 (2.2)   |
| <i>Respiratory rate (mean (SD))</i>         | 22.63 (3.7)   |
| <i>Need for oxygen support (%)</i>          |               |
| Not on oxygen support                       | 4135 (100.0)  |
| <i>RTS (mean (SD))</i>                      | 7.99 (0.13)   |
| <b>Injury characteristics</b>               |               |
| <i>Type of Injury (%)</i>                   |               |
| Blunt                                       | 4075 (98.5)   |

|    |                                      |             |
|----|--------------------------------------|-------------|
| 1  |                                      |             |
| 2  |                                      |             |
| 3  |                                      |             |
| 4  | Penetrating                          | 56 (1.4)    |
| 5  | Blunt & penetrating                  | 4 (0.1)     |
| 6  |                                      |             |
| 7  | <i>Number of serious injury* (%)</i> |             |
| 8  | No serious injury                    | 4112 (99.4) |
| 9  |                                      |             |
| 10 | Single                               | 21 (0.5)    |
| 11 | Multiple                             | 2 (0.0)     |
| 12 |                                      |             |
| 13 | <i>ISS (%)</i>                       |             |
| 14 |                                      |             |
| 15 | No defined ISS                       | 2048 (49.5) |
| 16 | Mild                                 | 2072 (50.1) |
| 17 |                                      |             |
| 18 | Moderate                             | 15 (0.4)    |
| 19 | Severe                               | 0 (0.0)     |
| 20 |                                      |             |
| 21 | Profound                             | 0 (0.0)     |
| 22 |                                      |             |

23 \*A serious injury was defined as an injury that warrants hospitalisation.(1)

24

25

26

27

28

29

30

31

32

33

34

35

36

37

38

39

40

41

42

43

44

45

46

47

48

49

50

51

52

53

54

55

56

57

58

59

60

**Table 2A: The Cape Triage Score depicting the TEWS (2)**

|                                           | Adult Triage Score |              |        |         |                 |                        |               |
|-------------------------------------------|--------------------|--------------|--------|---------|-----------------|------------------------|---------------|
|                                           | 3                  | 2            | 1      | 0       | 1               | 2                      | 3             |
| Mobility                                  |                    |              |        | Walking | With help       | Stretcher/<br>Immobile |               |
| RR                                        |                    | Less than 9  |        | 9-14    | 15-20           | 21-29                  | More than 29  |
| HR                                        |                    | Less than 41 | 41-50  | 51-100  | 101-110         | 111-129                | More than 129 |
| SBP                                       | Less than 71       | 71-80        | 81-100 | 101-199 |                 | More than 199          |               |
| Temp.                                     |                    | Less than 35 |        | 35-38.4 |                 | 38.5 or more           |               |
| AVPU                                      |                    |              |        | Alert   | Reacts to Voice | Reacts to Pain         | Unresponsive  |
| Trauma                                    |                    |              |        | No      | Yes             |                        |               |
| <b>Over 12 years / taller than 150 cm</b> |                    |              |        |         |                 |                        |               |

**Table 2B: The Cape Triage Score depicting the SATS color code (2)**

| Colour               | Red                   | Orange                         | Yellow                      | Green              |
|----------------------|-----------------------|--------------------------------|-----------------------------|--------------------|
| TEWS                 | 7 or more             | 5 - 6                          | 3-4                         | 0-2                |
| Target time to treat | Immediate             | Less than 10 min               | Less than 60 min            | Less than 240 min  |
| Mechanism of injury  |                       | High energy transfer           |                             |                    |
|                      |                       | Shortness of breath - acute    |                             |                    |
|                      |                       | Coughing blood                 |                             |                    |
|                      |                       | Chest pain                     |                             |                    |
|                      |                       | Haemorrhage uncontrolled       | Haemorrhage - controlled    |                    |
|                      | Seizure - current     | Seizure-post ictal             |                             |                    |
|                      |                       | Focal neurology - acute        |                             |                    |
|                      |                       | Level of consciousness reduced |                             |                    |
| Presentation         |                       | Psychosis/aggression           |                             | All other patients |
|                      |                       | Threatened limb                |                             |                    |
|                      |                       | Dislocation - other joint      | Dislocation - finger or toe |                    |
|                      |                       | Fracture - compound            | Fracture - closed           |                    |
|                      |                       | Burn over 20%                  | Burn - other                |                    |
|                      | Burn-face/ inhalation | Burn - electrical              |                             |                    |
|                      |                       | Burn-circumferential           |                             |                    |

|                                              |                                     |                                           |                                              |
|----------------------------------------------|-------------------------------------|-------------------------------------------|----------------------------------------------|
|                                              |                                     | Burn-chemical                             |                                              |
|                                              |                                     | Poisoning/overdose                        | Abdominal pain                               |
|                                              | Hypoglycemia<br>glucose less than 3 | Diabetic - glucose over 11<br>& ketonuria | Diabetic - glucose over 17<br>(no ketonuria) |
|                                              |                                     | Vomiting - fresh blood                    | Vomiting - persistent                        |
|                                              |                                     | Pregnancy and abdominal<br>trauma or pain | Pregnancy and trauma                         |
|                                              |                                     |                                           | Pregnancy and PV bleed                       |
| Pain                                         |                                     | Severe                                    | Moderate                                     |
|                                              |                                     |                                           | Mild                                         |
| Senior health care professional's discretion |                                     |                                           |                                              |

## References

- Gardner A, Forson PK, Oduro G, Stewart B, Dike N, Glover P, et al. Diagnostic accuracy of the Kampala Trauma Score using estimated Abbreviated Injury Scale scores and physician opinion. *Injury* [Internet]. 2017 Jan 1 [cited 2021 Aug 23];48(1):177–83. Available from: <https://pubmed.ncbi.nlm.nih.gov/27908493/>
- Rominski S, Bell SA, Oduro G, Ampong P, Oteng R, Donkor P. The implementation of the South African Triage Score (SATS) in an urban teaching hospital, Ghana. *African journal of emergency medicine: Revue africaine de la medecine d'urgence* [Internet]. 2014 [cited 2021 Aug 23];4(2):71–5. Available from: <https://pubmed.ncbi.nlm.nih.gov/28344927/>

STROBE Statement—Checklist of items that should be included in reports of *cohort studies*1  
2  
3  
4  
5  
6  
7  
8  
9  
10  
11  
12  
13  
14  
15  
16  
17  
18  
19  
20  
21  
22  
23  
24  
25  
26  
27  
28  
29  
30  
31  
32  
33  
34  
35  
36  
37  
38  
39  
40  
41  
42  
43  
44  
45  
46  
47  
48  
49  
50  
51  
52  
53  
54  
55  
56  
57  
58  
59  
60

|                              | Item No | Recommendation                                                                                                                                                                                                                                                                                                         | Page No            |
|------------------------------|---------|------------------------------------------------------------------------------------------------------------------------------------------------------------------------------------------------------------------------------------------------------------------------------------------------------------------------|--------------------|
| <b>Title and abstract</b>    | 1       | (a) Indicate the study's design with a commonly used term in the title or the abstract<br>(b) Provide in the abstract an informative and balanced summary of what was done and what was found                                                                                                                          | 1<br>3             |
| <b>Introduction</b>          |         |                                                                                                                                                                                                                                                                                                                        |                    |
| Background/rationale         | 2       | Explain the scientific background and rationale for the investigation being reported                                                                                                                                                                                                                                   | 5                  |
| Objectives                   | 3       | State specific objectives, including any prespecified hypotheses                                                                                                                                                                                                                                                       | 5                  |
| <b>Methods</b>               |         |                                                                                                                                                                                                                                                                                                                        |                    |
| Study design                 | 4       | Present key elements of study design early in the paper                                                                                                                                                                                                                                                                | 6                  |
| Setting                      | 5       | Describe the setting, locations, and relevant dates, including periods of recruitment, exposure, follow-up, and data collection                                                                                                                                                                                        | 6                  |
| Participants                 | 6       | (a) Give the eligibility criteria, and the sources and methods of selection of participants. Describe methods of follow-up<br>(b) For matched studies, give matching criteria and number of exposed and unexposed                                                                                                      | 7                  |
| Variables                    | 7       | Clearly define all outcomes, exposures, predictors, potential confounders, and effect modifiers. Give diagnostic criteria, if applicable                                                                                                                                                                               | 8                  |
| Data sources/<br>measurement | 8*      | For each variable of interest, give sources of data and details of methods of assessment (measurement). Describe comparability of assessment methods if there is more than one group                                                                                                                                   | 7                  |
| Bias                         | 9       | Describe any efforts to address potential sources of bias                                                                                                                                                                                                                                                              | 9                  |
| Study size                   | 10      | Explain how the study size was arrived at                                                                                                                                                                                                                                                                              | -                  |
| Quantitative variables       | 11      | Explain how quantitative variables were handled in the analyses. If applicable, describe which groupings were chosen and why                                                                                                                                                                                           | 9                  |
| Statistical methods          | 12      | (a) Describe all statistical methods, including those used to control for confounding<br>(b) Describe any methods used to examine subgroups and interactions<br>(c) Explain how missing data were addressed<br>(d) If applicable, explain how loss to follow-up was addressed<br>(e) Describe any sensitivity analyses | 9                  |
| <b>Results</b>               |         |                                                                                                                                                                                                                                                                                                                        |                    |
| Participants                 | 13*     | (a) Report numbers of individuals at each stage of study—eg numbers potentially eligible, examined for eligibility, confirmed eligible, included in the study, completing follow-up, and analysed<br>(b) Give reasons for non-participation at each stage<br>(c) Consider use of a flow diagram                        | 10<br><br>Figure 1 |
| Descriptive data             | 14*     | (a) Give characteristics of study participants (eg demographic, clinical, social) and information on exposures and potential confounders<br>(b) Indicate number of participants with missing data for each variable of interest<br>(c) Summarise follow-up time (eg, average and total amount)                         | 10                 |
| Outcome data                 | 15*     | Report numbers of outcome events or summary measures over time                                                                                                                                                                                                                                                         | 10-11              |

|    |                          |    |                                                                                                                                                                                                              |       |
|----|--------------------------|----|--------------------------------------------------------------------------------------------------------------------------------------------------------------------------------------------------------------|-------|
| 1  | Main results             | 16 | (a) Give unadjusted estimates and, if applicable, confounder-adjusted estimates and their precision (eg, 95% confidence interval). Make clear which confounders were adjusted for and why they were included | 10-11 |
| 2  |                          |    | (b) Report category boundaries when continuous variables were categorized                                                                                                                                    |       |
| 3  |                          |    | (c) If relevant, consider translating estimates of relative risk into absolute risk for a meaningful time period                                                                                             |       |
| 4  |                          |    |                                                                                                                                                                                                              |       |
| 5  |                          |    |                                                                                                                                                                                                              |       |
| 6  |                          |    |                                                                                                                                                                                                              |       |
| 7  |                          |    |                                                                                                                                                                                                              |       |
| 8  |                          |    |                                                                                                                                                                                                              |       |
| 9  | Other analyses           | 17 | Report other analyses done—eg analyses of subgroups and interactions, and sensitivity analyses                                                                                                               | 11    |
| 10 |                          |    |                                                                                                                                                                                                              |       |
| 11 | <b>Discussion</b>        |    |                                                                                                                                                                                                              |       |
| 12 |                          |    |                                                                                                                                                                                                              |       |
| 13 | Key results              | 18 | Summarise key results with reference to study objectives                                                                                                                                                     | 12    |
| 14 | Limitations              | 19 | Discuss limitations of the study, taking into account sources of potential bias or imprecision. Discuss both direction and magnitude of any potential bias                                                   | 13    |
| 15 |                          |    |                                                                                                                                                                                                              |       |
| 16 | Interpretation           | 20 | Give a cautious overall interpretation of results considering objectives, limitations, multiplicity of analyses, results from similar studies, and other relevant evidence                                   | 12-13 |
| 17 |                          |    |                                                                                                                                                                                                              |       |
| 18 |                          |    |                                                                                                                                                                                                              |       |
| 19 | Generalisability         | 21 | Discuss the generalisability (external validity) of the study results                                                                                                                                        | 13    |
| 20 |                          |    |                                                                                                                                                                                                              |       |
| 21 | <b>Other information</b> |    |                                                                                                                                                                                                              |       |
| 22 | Funding                  | 22 | Give the source of funding and the role of the funders for the present study and, if applicable, for the original study on which the present article is based                                                | 15    |
| 23 |                          |    |                                                                                                                                                                                                              |       |
| 24 |                          |    |                                                                                                                                                                                                              |       |

25  
26 \*Give information separately for exposed and unexposed groups.

27  
28 **Note:** An Explanation and Elaboration article discusses each checklist item and gives methodological background and  
29 published examples of transparent reporting. The STROBE checklist is best used in conjunction with this article (freely  
30 available on the Web sites of PLoS Medicine at <http://www.plosmedicine.org/>, Annals of Internal Medicine at  
31 <http://www.annals.org/>, and Epidemiology at <http://www.epidem.com/>). Information on the STROBE Initiative is  
32 available at <http://www.strobe-statement.org>.  
33  
34  
35  
36  
37  
38  
39  
40  
41  
42  
43  
44  
45  
46  
47  
48  
49  
50  
51  
52  
53  
54  
55  
56  
57  
58  
59  
60
