# Supplementary material for: Profile and triage validity of trauma patients triaged green: a prospective cohort study from a secondary care hospital in India
Source: PubMed Central journal article supplement (PMC10173999; doi:10.1136/bmjopen-2022-065036), 2023-05-08
Supplement: bmjopen-2022-065036supp001.pdf [file bmjopen-2022-065036supp001.pdf]

**Table 1: Physiological and injury characteristics of patients triaged green (N=4135)**

| <b>Demographics</b>                         |               |
|---------------------------------------------|---------------|
| <i>Mechanism of Injury (%)</i>              |               |
| Transport accidents                         | 916 (22.2)    |
| Assault                                     | 870 (21)      |
| Fall                                        | 856 (20.7)    |
| Other                                       | 852 (20.6)    |
| Animal bite                                 | 641 (15.5)    |
| <i>Transfer status</i>                      |               |
| Direct                                      | 4006 (97)     |
| Transferred                                 | 129 (3)       |
| <b>Vitals</b>                               |               |
| <i>AVPU (%)</i>                             |               |
| Unresponsive                                | 3 (0.1)       |
| Pain                                        | 6 (0.1)       |
| Verbal                                      | 3 (0.1)       |
| Alert                                       | 4123 (99.7)   |
| <i>GCS (mean (SD))</i>                      | 14.98 (0.4)   |
| <i>GCS (%)</i>                              |               |
| Mild                                        | 4125 (99.8)   |
| Moderate                                    | 4 (0.1)       |
| Severe                                      | 6 (0.1)       |
| <i>Systolic blood pressure (mean (SD))</i>  | 128.05 (18.9) |
| <i>Diastolic blood pressure (mean (SD))</i> | 84.34 (13.3)  |
| <i>Heart rate (mean (SD))</i>               | 88.88 (17)    |
| <i>Oxygen saturation (mean (SD))</i>        | 97.79 (2.2)   |
| <i>Respiratory rate (mean (SD))</i>         | 22.63 (3.7)   |
| <i>Need for oxygen support (%)</i>          |               |
| Not on oxygen support                       | 4135 (100.0)  |
| <i>RTS (mean (SD))</i>                      | 7.99 (0.13)   |
| <b>Injury characteristics</b>               |               |
| <i>Type of Injury (%)</i>                   |               |
| Blunt                                       | 4075 (98.5)   |

|                                      |             |
|--------------------------------------|-------------|
| Penetrating                          | 56 (1.4)    |
| Blunt & penetrating                  | 4 (0.1)     |
| <i>Number of serious injury* (%)</i> |             |
| <hr/>                                |             |
| No serious injury                    | 4112 (99.4) |
| Single                               | 21 (0.5)    |
| Multiple                             | 2 (0.0)     |
| <i>ISS (%)</i>                       |             |
| <hr/>                                |             |
| No defined ISS                       | 2048 (49.5) |
| Mild                                 | 2072 (50.1) |
| Moderate                             | 15 (0.4)    |
| Severe                               | 0 (0.0)     |
| Profound                             | 0 (0.0)     |
| <hr/>                                |             |

\*A serious injury was defined as an injury that warrants hospitalisation.(1)

**Table 2A: The Cape Triage Score depicting the TEWS (2)**

| <b>Adult Triage Score</b>                 |              |              |        |         |                 |                        |               |
|-------------------------------------------|--------------|--------------|--------|---------|-----------------|------------------------|---------------|
|                                           | 3            | 2            | 1      | 0       | 1               | 2                      | 3             |
| Mobility                                  |              |              |        | Walking | With help       | Stretcher/<br>Immobile |               |
| RR                                        |              | Less than 9  |        | 9-14    | 15-20           | 21-29                  | More than 29  |
| HR                                        |              | Less than 41 | 41-50  | 51-100  | 101-110         | 111-129                | More than 129 |
| SBP                                       | Less than 71 | 71-80        | 81-100 | 101-199 |                 | More than 199          |               |
| Temp.                                     |              | Less than 35 |        | 35-38.4 |                 | 38.5 or more           |               |
| AVPU                                      |              |              |        | Alert   | Reacts to Voice | Reacts to Pain         | Unresponsive  |
| Trauma                                    |              |              |        | No      | Yes             |                        |               |
| <b>Over 12 years / taller than 150 cm</b> |              |              |        |         |                 |                        |               |

**Table 2B: The Cape Triage Score depicting the SATS color code (2)**

| Colour               | Red                   | Orange                         | Yellow                      | Green              |
|----------------------|-----------------------|--------------------------------|-----------------------------|--------------------|
| TEWS                 | 7 or more             | 5 - 6                          | 3-4                         | 0-2                |
| Target time to treat | Immediate             | Less than 10 min               | Less than 60 min            | Less than 240 min  |
| Mechanism of injury  |                       | High energy transfer           |                             |                    |
|                      |                       | Shortness of breath - acute    |                             |                    |
|                      |                       | Coughing blood                 |                             |                    |
|                      |                       | Chest pain                     |                             |                    |
|                      |                       | Haemorrhage uncontrolled       | Haemorrhage - controlled    |                    |
|                      | Seizure - current     | Seizure-post ictal             |                             |                    |
|                      |                       | Focal neurology - acute        |                             |                    |
|                      |                       | Level of consciousness reduced |                             |                    |
| Presentation         |                       | Psychosis/aggression           |                             | All other patients |
|                      |                       | Threatened limb                |                             |                    |
|                      |                       | Dislocation - other joint      | Dislocation - finger or toe |                    |
|                      |                       | Fracture - compound            | Fracture - closed           |                    |
|                      |                       | Burn over 20%                  | Burn - other                |                    |
|                      | Burn-face/ inhalation | Burn - electrical              |                             |                    |
|                      |                       | Burn-circumferential           |                             |                    |

|                                              |                                     |                                           |                                              |
|----------------------------------------------|-------------------------------------|-------------------------------------------|----------------------------------------------|
|                                              |                                     | Burn-chemical                             |                                              |
|                                              |                                     | Poisoning/overdose                        | Abdominal pain                               |
|                                              | Hypoglycemia<br>glucose less than 3 | Diabetic - glucose over 11<br>& ketonuria | Diabetic - glucose over 17<br>(no ketonuria) |
|                                              |                                     | Vomiting - fresh blood                    | Vomiting - persistent                        |
|                                              |                                     | Pregnancy and abdominal<br>trauma or pain | Pregnancy and trauma                         |
|                                              |                                     |                                           | Pregnancy and PV bleed                       |
| Pain                                         |                                     | Severe                                    | Moderate                                     |
|                                              |                                     |                                           | Mild                                         |
| Senior health care professional's discretion |                                     |                                           |                                              |

## References

1. Gardner A, Forson PK, Oduro G, Stewart B, Dike N, Glover P, et al. Diagnostic accuracy of the Kampala Trauma Score using estimated Abbreviated Injury Scale scores and physician opinion. *Injury* [Internet]. 2017 Jan 1 [cited 2021 Aug 23];48(1):177–83. Available from: <https://pubmed.ncbi.nlm.nih.gov/27908493/>
2. Rominski S, Bell SA, Oduro G, Ampong P, Oteng R, Donkor P. The implementation of the South African Triage Score (SATS) in an urban teaching hospital, Ghana. *African journal of emergency medicine: Revue africaine de la medecine d'urgence* [Internet]. 2014 [cited 2021 Aug 23];4(2):71–5. Available from: <https://pubmed.ncbi.nlm.nih.gov/28344927/>
