# Supplementary material for: Profile and triage validity of trauma patients triaged green: a prospective cohort study from a secondary care hospital in India
Source: PubMed Central journal article supplement (PMC10173999; doi:10.1136/bmjopen-2022-065036), 2023-05-08
Supplement: bmjopen-2022-065036supp002.pdf [file bmjopen-2022-065036supp002.pdf]

## Supplementary material

Table of excluded International Classification of Diseases version 10 (ICD-10) codes

| ICD-10 code | Short description     | Full description                                                                   |
|-------------|-----------------------|------------------------------------------------------------------------------------|
| W65         | Other external causes | Drowning and submersion while in bath-tub                                          |
| W67         | Other external causes | Drowning and submersion while in swimming-pool                                     |
| W68         | Other external causes | Drowning and submersion following fall into swimming-pool                          |
| W69         | Other external causes | Drowning and submersion while in natural water                                     |
| W70         | Other external causes | Drowning and submersion following fall into natural water                          |
| W73         | Other external causes | Other specified drowning and submersion                                            |
| W74         | Other external causes | Unspecified drowning and submersion                                                |
| W78         | Other external causes | Inhalation of gastric contents                                                     |
| W79         | Other external causes | Inhalation and ingestion of food causing obstruction of respiratory tract          |
| W80         | Other external causes | Inhalation and ingestion of other objects causing obstruction of respiratory tract |
| W81         | Other external causes | Confined to or trapped in a low-oxygen environment                                 |
| W83         | Other external causes | Other specified threats to breathing                                               |

| W84         | Other external causes | Unspecified threat to breathing                                                                                                             |
|-------------|-----------------------|---------------------------------------------------------------------------------------------------------------------------------------------|
| X20         | Other external causes | Contact with venomous snakes and lizards                                                                                                    |
| ICD-10 code | Short description     | Full description                                                                                                                            |
| X21         | Other external causes | Contact with venomous spiders                                                                                                               |
| X22         | Other external causes | Contact with scorpions                                                                                                                      |
| X23         | Other external causes | Contact with hornets, wasps and bees                                                                                                        |
| X24         | Other external causes | Contact with centipedes and venomous millipedes (tropical)                                                                                  |
| X25         | Other external causes | Contact with other venomous arthropods                                                                                                      |
| X26         | Other external causes | Contact with venomous marine animals and plants                                                                                             |
| X27         | Other external causes | Contact with other specified venomous animals                                                                                               |
| X28         | Other external causes | Contact with other specified venomous plants                                                                                                |
| X29         | Other external causes | Contact with unspecified venomous animal or plant                                                                                           |
| X40         | Other external causes | Accidental poisoning by and exposure to nonopioid analgesics, antipyretics and antirheumatics                                               |
| X41         | Other external causes | Accidental poisoning by and exposure to antiepileptic, sedative-hypnotic, antiparkinsonism and psychotropic drugs, not elsewhere classified |
| X42         | Other external causes | Accidental poisoning by and exposure to narcotics and psychodysleptics [hallucinogens], not elsewhere classified                            |

| X43         | Other external causes | Accidental poisoning by and exposure to other drugs acting on the autonomic nervous system                 |
|-------------|-----------------------|------------------------------------------------------------------------------------------------------------|
| X44         | Other external causes | Accidental poisoning by and exposure to other and unspecified drugs, medicaments and biological substances |
| X45         | Other external causes | Accidental poisoning by and exposure to alcohol                                                            |
| X46         | Other external causes | Accidental poisoning by and exposure to organic solvents and halogenated hydrocarbons and their vapours    |
| ICD-10 code | Short description     | Full description                                                                                           |
| X47         | Other external causes | Accidental poisoning by and exposure to other gases and vapours                                            |
| X48         | Other external causes | Accidental poisoning by and exposure to pesticides                                                         |
| X49         | Other external causes | Accidental poisoning by and exposure to other and unspecified chemicals and noxious substances             |
| X50         | Other external causes | Overexertion and strenuous or repetitive movements                                                         |
| X51         | Other external causes | Travel and motion                                                                                          |
| X52         | Other external causes | Prolonged stay in weightless environment                                                                   |
| X53         | Other external causes | Lack of food                                                                                               |
| X54         | Other external causes | Lack of water                                                                                              |
| X57         | Other external causes | Unspecified privation                                                                                      |
| X60         | Intentional self-harm | Intentional self-poisoning by and exposure to nonopioid analgesics, antipyretics and antirheumatics        |

| X61         | Intentional self-harm | Intentional self-poisoning by and exposure to antiepileptic, sedative-hypnotic, antiparkinsonism and psychotropic drugs, not elsewhere classified |
|-------------|-----------------------|---------------------------------------------------------------------------------------------------------------------------------------------------|
| X62         | Intentional self-harm | Intentional self-poisoning by and exposure to narcotics and psychodysleptics [hallucinogens], not elsewhere classified                            |
| X63         | Intentional self-harm | Intentional self-poisoning by and exposure to other drugs acting on the autonomic nervous system                                                  |
| X64         | Intentional self-harm | Intentional self-poisoning by and exposure to other and unspecified drugs, medicaments and biological substances                                  |
| X65         | Intentional self-harm | Intentional self-poisoning by and exposure to alcohol                                                                                             |
| X66         | Intentional self-harm | Intentional self-poisoning by and exposure to organic solvents and halogenated hydrocarbons and their vapours                                     |
| ICD-10 code | Short description     | Full description                                                                                                                                  |
| X67         | Intentional self-harm | Intentional self-poisoning by and exposure to other gases and vapours                                                                             |
| X68         | Intentional self-harm | Intentional self-poisoning by and exposure to pesticides                                                                                          |
| X69         | Intentional self-harm | Intentional self-poisoning by and exposure to other and unspecified chemicals and noxious substances                                              |
| X85         | Assault               | Assault by drugs, medicaments and biological substances                                                                                           |
| X88         | Assault               | Assault by gases and vapours                                                                                                                      |
| X89         | Assault               | Assault by other specified chemicals and noxious substances                                                                                       |
| X90         | Assault               | Assault by unspecified chemical or noxious substance                                                                                              |
| Y06         | Assault               | Neglect and abandonment                                                                                                                           |
| Y060        | Assault               | Neglect and abandonment by spouse or partner                                                                                                      |

|             |                              |                                                                                                                                                       |
|-------------|------------------------------|-------------------------------------------------------------------------------------------------------------------------------------------------------|
| Y061        | Assault                      | Neglect and abandonment by parent                                                                                                                     |
| Y062        | Assault                      | Neglect and abandonment by acquaintance or friend                                                                                                     |
| Y068        | Assault                      | Neglect and abandonment by other specified persons                                                                                                    |
| Y069        | Assault                      | Neglect and abandonment by unspecified person                                                                                                         |
| Y07         | Assault                      | Other maltreatment                                                                                                                                    |
| Y070        | Assault                      | Other maltreatment by spouse or partner                                                                                                               |
| Y071        | Assault                      | Other maltreatment by parent                                                                                                                          |
| Y072        | Assault                      | Other maltreatment by acquaintance or friend                                                                                                          |
| Y073        | Assault                      | Other maltreatment by official authorities                                                                                                            |
| Y078        | Assault                      | Other maltreatment by other specified persons                                                                                                         |
| Y079        | Assault                      | Other maltreatment by unspecified person                                                                                                              |
| Y10         | Event of undetermined intent | Poisoning by and exposure to nonopioid analgesics, antipyretics and antirheumatics, undetermined intent                                               |
| ICD-10 code | Short description            | Full description                                                                                                                                      |
| Y11         | Event of undetermined intent | Poisoning by and exposure to antiepileptic, sedative-hypnotic, antiparkinsonism and psychotropic drugs, not elsewhere classified, undetermined intent |
| Y12         | Event of undetermined intent | Poisoning by and exposure to narcotics and psychodysleptics [hallucinogens], not elsewhere classified, undetermined intent                            |
| Y13         | Event of undetermined intent | Poisoning by and exposure to other drugs acting on the autonomic nervous system, undetermined intent                                                  |
| Y14         | Event of undetermined intent | Poisoning by and exposure to other and unspecified drugs, medicaments and biological substances, undetermined intent                                  |

|      |                                          |                                                                                                                   |
|------|------------------------------------------|-------------------------------------------------------------------------------------------------------------------|
| Y15  | Event of undetermined intent             | Poisoning by and exposure to alcohol, undetermined intent                                                         |
| Y16  | Event of undetermined intent             | Poisoning by and exposure to organic solvents and halogenated hydrocarbons and their vapours, undetermined intent |
| Y17  | Event of undetermined intent             | Poisoning by and exposure to other gases and vapours, undetermined intent                                         |
| Y18  | Event of undetermined intent             | Poisoning by and exposure to pesticides, undetermined intent                                                      |
| Y19  | Event of undetermined intent             | Poisoning by and exposure to other and unspecified chemicals and noxious substances, undetermined intent          |
| Y352 | Legal intervention and operations of war | Legal intervention involving gas                                                                                  |
| Y355 | Legal intervention and operations of war | Legal execution                                                                                                   |
